# Supplementary material
Source: PubMed Central journal article supplement (PMC3465956)

# **Stereoselective Synthesis of Morpholines Via Copper-Promoted Oxyamination of Alkenes**

**Fatima C. Sequeira and Sherry R. Chemler\***

*Department of Chemistry, The State University of New York at Buffalo, Buffalo, New York 14260*

*schemler@buffalo.edu*

Supporting Information II: NMR Spectra of New Compounds

fs-V-28proton

Sample Name:

Data Collected on:  
chemnmr400.chem.buffalo.edu-inova400  
Archive directory:

Sample directory:

Fidfile: PROTON

Pulse Sequence: PROTON (s2pul)  
Solvent: cdcl3  
Data collected on: Nov 3 2011

Temp. 25.0 C / 298.1 K  
Operator: Chemler

Relax. delay 2.000 sec  
Pulse 45.0 degrees  
Acq. time 2.585 sec  
Width 6387.7 Hz  
8 repetitions  
OBSERVE H1, 399.9389035 MHz  
DATA PROCESSING  
FT size 32768  
Total time 0 min 29 sec

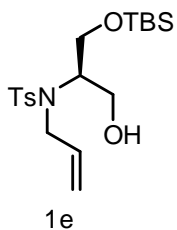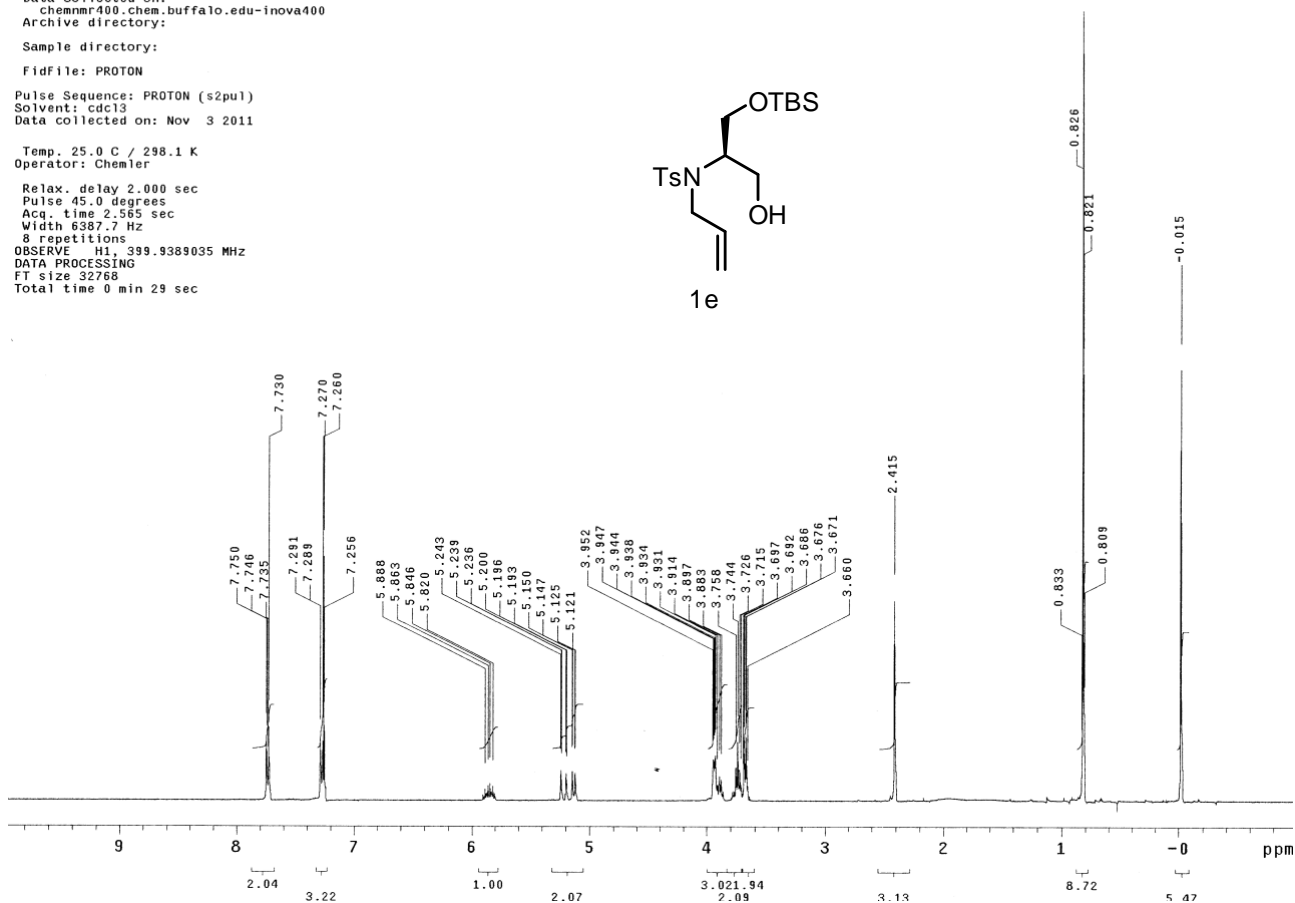

fs-V-28-carbon

Sample Name:

Data Collected on:  
roesy.chem.buffalo.edu-mercury300  
Archive directory:

Sample directory:

Fidfile: CARBON

Pulse Sequence: CARBON (s2pul)  
Solvent: cdcl3  
Data collected on: Nov 2 2011

Temp. 99.9 C / 1272.2 K  
Operator: Sherry

Relax. delay 7.000 sec  
Pulse 45.0 degrees  
Acq. time 0.869 sec  
Width 18867.3 Hz

6368 repetitions  
OBSERVE C13, 75.4536377 MHz  
DECOUPLE H1, 300.0754430 MHz  
Power: 38 dB  
continuously on  
WALTZ-16 modulated  
DATA PROCESSING  
Line broadening 0.5 Hz  
FT size 32768  
Total time 2231746 hr, 50 min

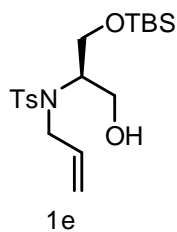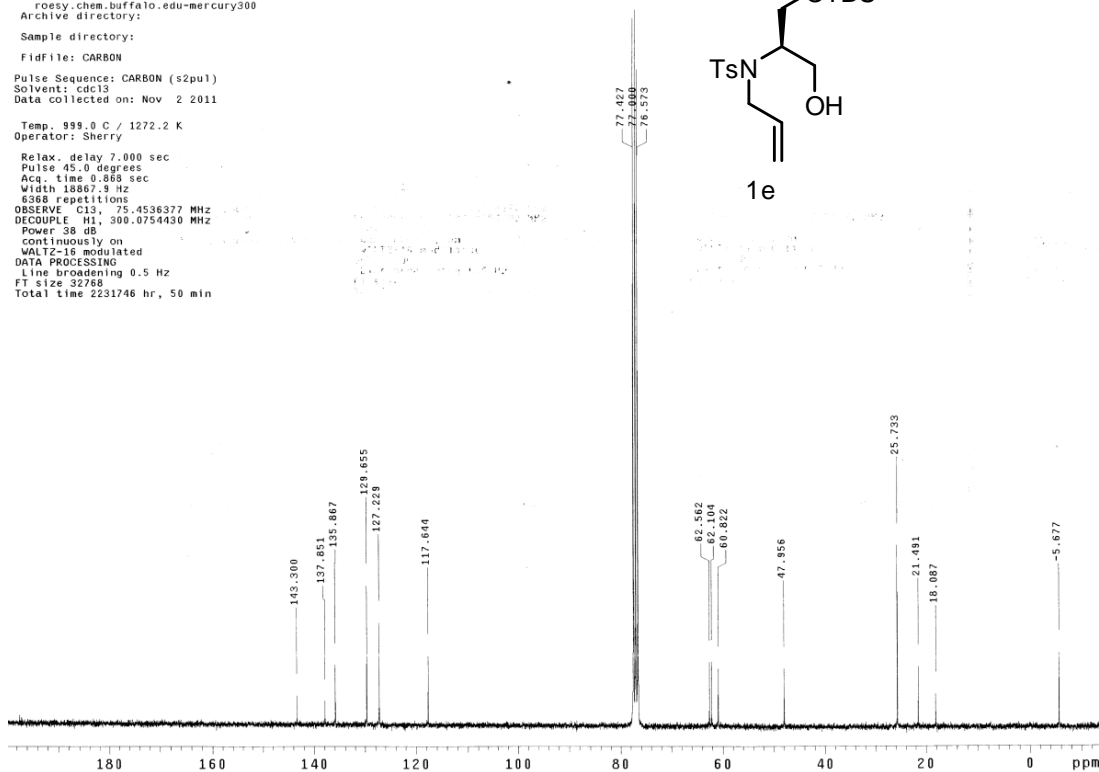



fs-III-288-proton

Sample Name:

Data Collected on:  
chemnmr500.chem.buffalo.edu-inova500

Archive directory:

Sample directory:

FidFile: PROTON

Pulse Sequence: PROTON (s2pu1)

Solvent: cdcl3

Data collected on: Oct 12 2011

Operator: Sherry

Relax. delay 1.000 sec

Pulse 45.0 degrees

Acq. time 2.048 sec

Width 8000.0 Hz

8 repetitions

OBSERVE H1, 499.8983757 MHz

DATA PROCESSING

FT size 32768

Total time 0 min 24 sec

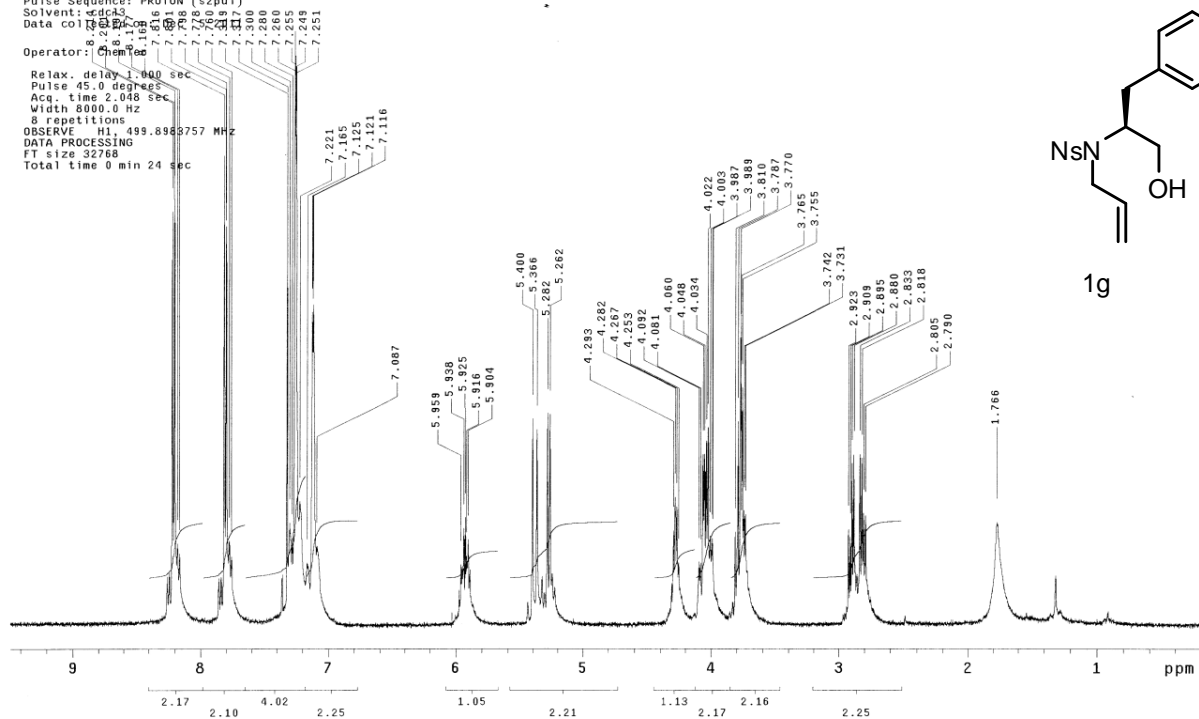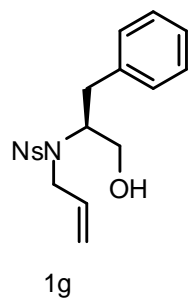

fs-III-288

Sample Name:

Data Collected on:  
roesy.chem.buffalo.edu-mercury300

Archive directory:

Sample directory:

FidFile: fs-III-288-carbon

Pulse Sequence: CARBON (s2pu1)

Solvent: cdcl3

Data collected on: Oct 12 2011

Temp. 25.0 C / 298.1 K

Operator: Sherry

Relax. delay 6.000 sec

Pulse 45.0 degrees

Acq. time 0.868 sec

Width 18867.9 Hz

7488 repetitions

OBSERVE C13, 75.4536366 MHz

DECOUPLE H1, 300.0754430 MHz

Power 38 dB

continuously on

WALTZ-16 modulated

DATA PROCESSING

Line broadening 0.5 Hz

FT size 32768

Total time 1953969 hr, 4 min

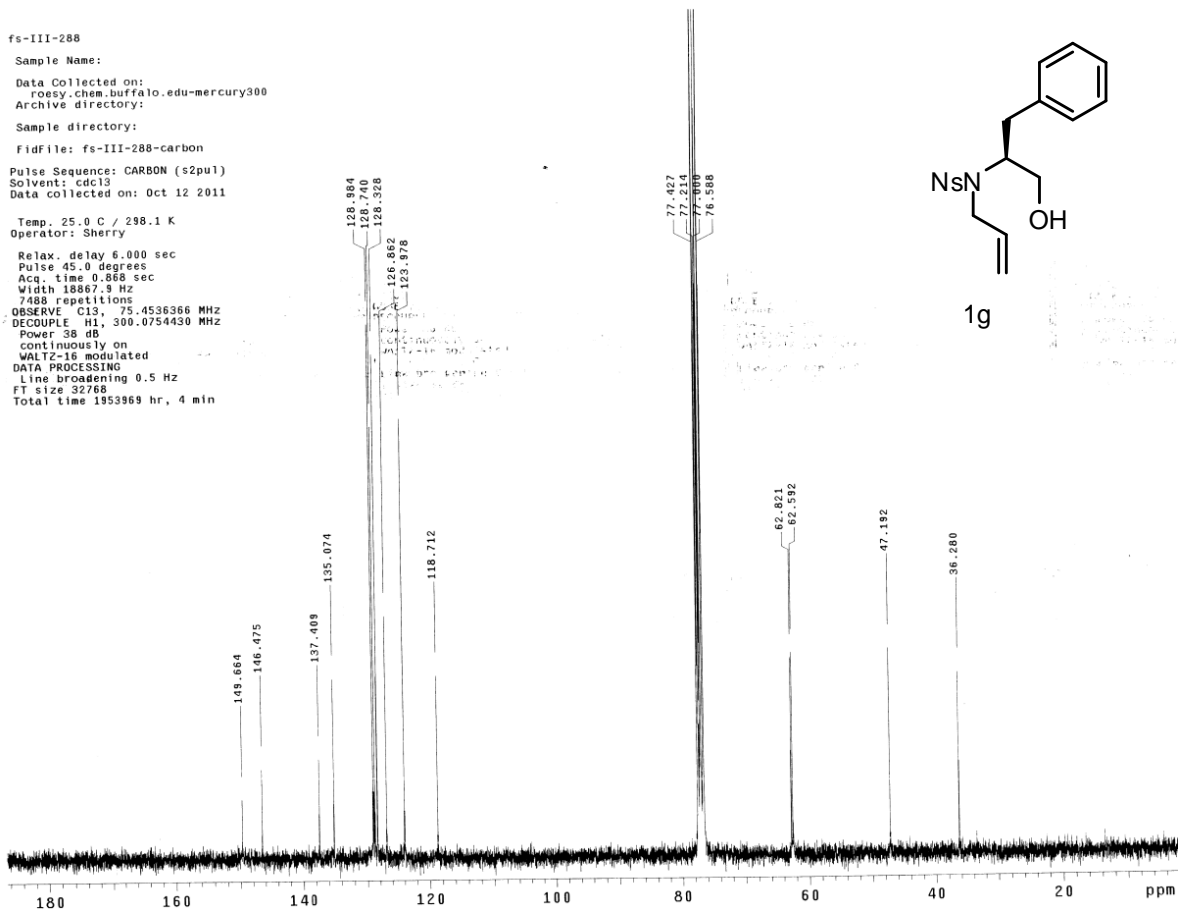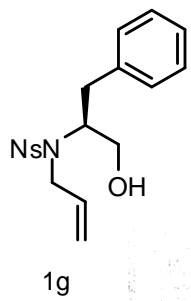

fs-V-46-proton

Sample Name:  
Data Collected on:  
chemnmr400.chem.buffalo.edu-inova400  
Archive directory:  
Sample directory:  
FidFile: PROTON

Pulse Sequence: PROTON (s2pul)  
Solvent: cdc13  
Data collected on: Dec 30 2011

Temp. 25.0 C / 298.1 K  
Operator: Chemler  
Relax. delay 2.000 sec  
Pulse 45.0 degrees  
Acq. time 2.565 sec  
Width 6387.7 Hz  
8 repetitions  
OBSERVE H1, 399.9389020 MHz  
DATA PROCESSING  
FT size 32768  
Total time 0 min 29 sec

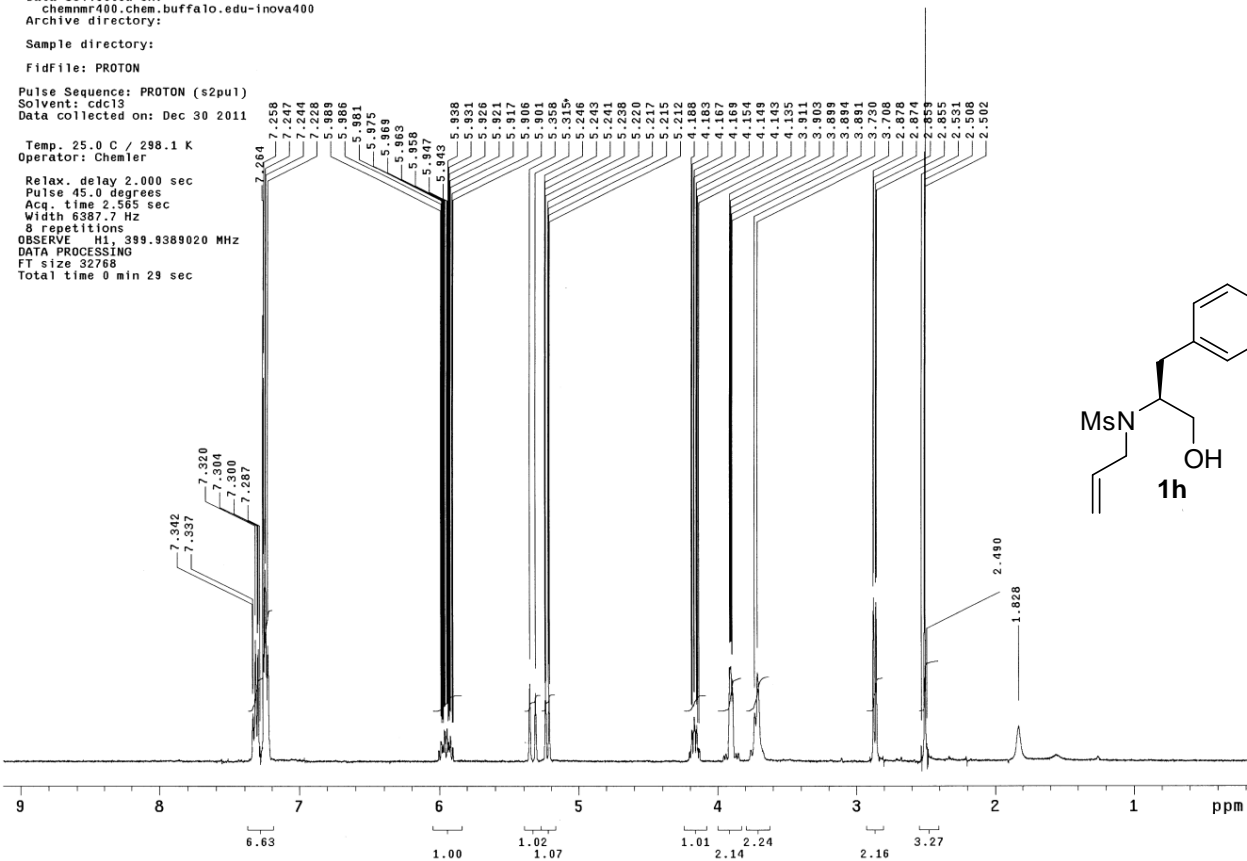

fs-V-46proton

Sample Name:  
Data Collected on:  
roesy.chem.buffalo.edu-mercury300  
Archive directory:  
Sample directory:  
FidFile: CARBON

Pulse Sequence: CARBON (s2pul)  
Solvent: cdc13  
Data collected on: Dec 29 2011

Temp. 25.0 C / 298.1 K  
Operator: Sherry

Relax. delay 1.000 sec  
Pulse 45.0 degrees  
Acq. time 0.868 sec  
Width 18867.9 Hz  
31456 repetitions  
OBSERVE C13, 75.4536375 MHz  
DECOUPLE H1, 300.0754430 MHz  
Power 38 dB  
continuously on  
WALTZ-16 modulated  
DATA PROCESSING  
Line broadening 0.5 Hz  
FT size 32768  
Total time 565060 hr, 45 min

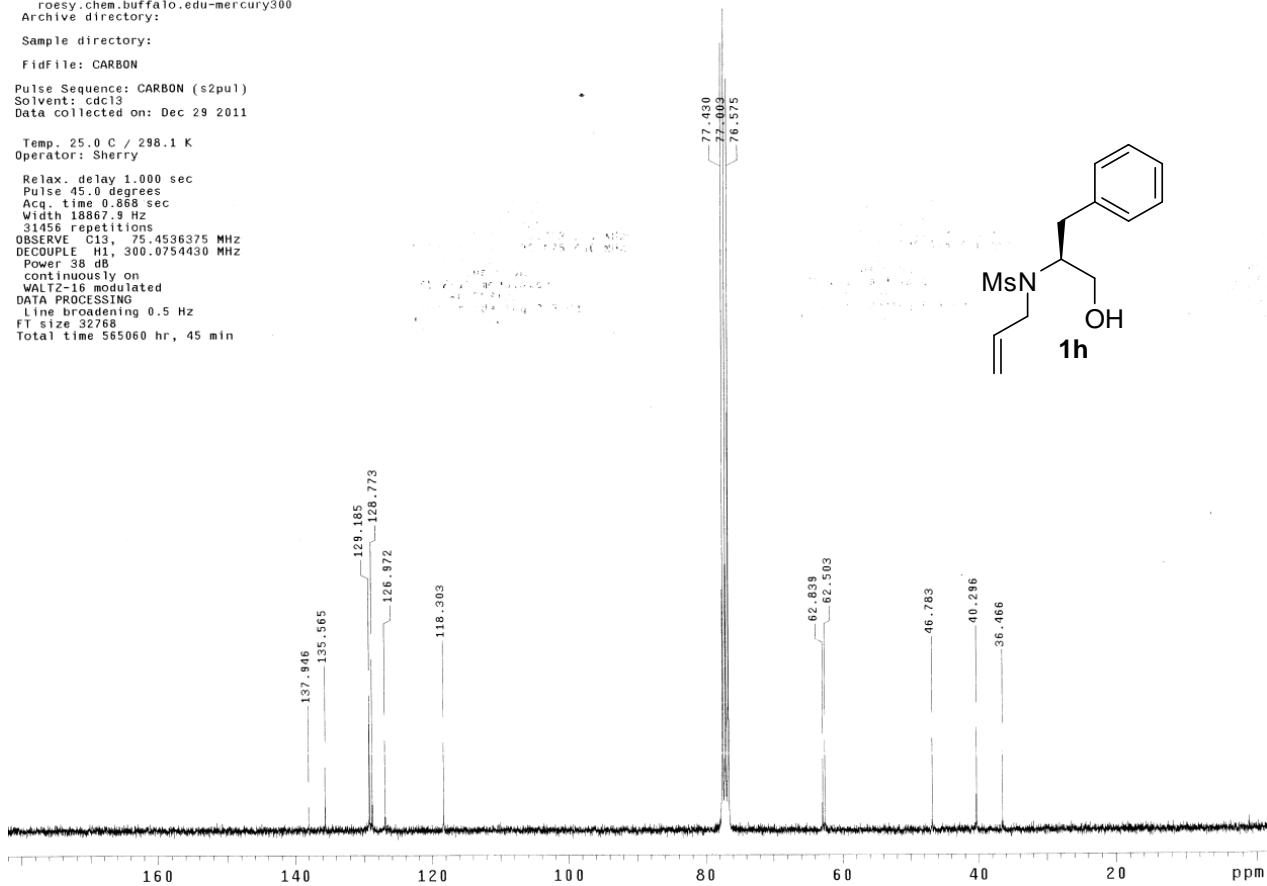

fs-II-12hNMRredo

Sample Name:

Data Collected on:  
chemnmr400.chem.buffalo.edu-inova400  
Archive directory:

Sample directory:

FidFile: PROTON

Pulse Sequence: PROTON (s2pu1)  
Solvent: cdcl3  
Data collected on: May 1 2012

Temp. 25.0 C / 298.1 K  
Operator: Chemler

Relax. delay 1.000 sec  
Pulse 45.0 degrees  
Acq. time 2.565 sec  
Width 6387.7 Hz  
3 repetitions  
OBSERVE H1, 399.9389031 MHz  
DATA PROCESSING  
FT size 32768  
Total time 0 min 29 sec

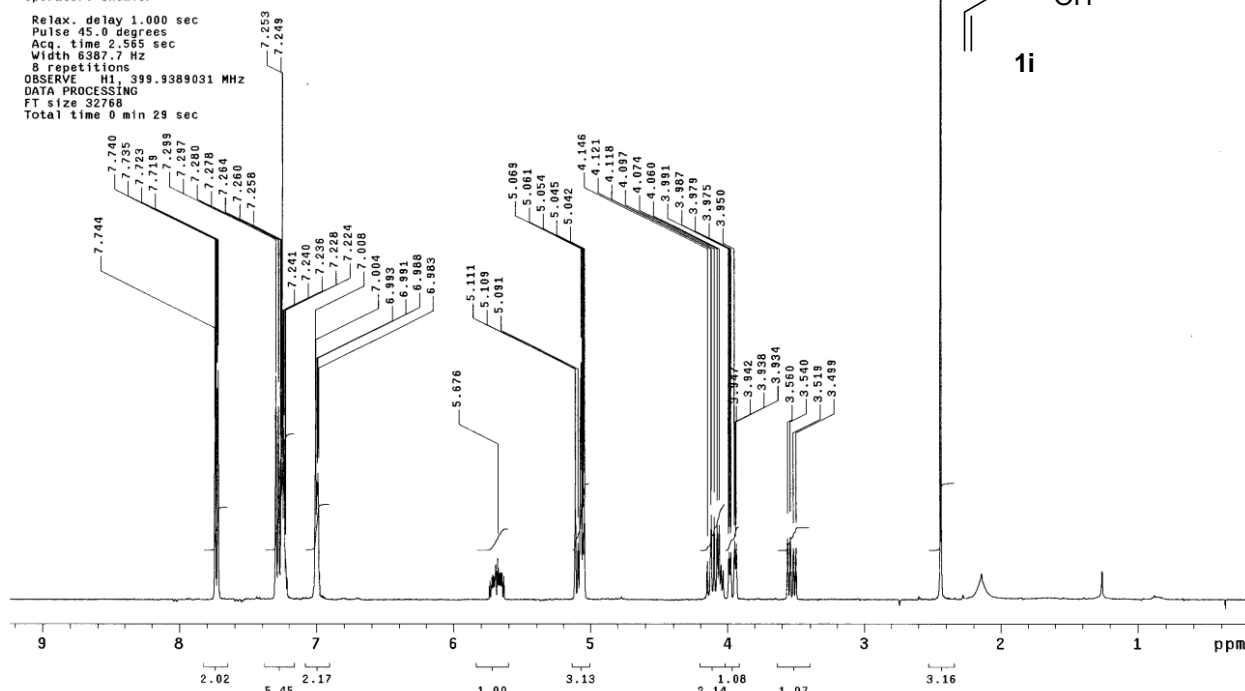

fs-iv-266carbon2

Sample Name:

Data Collected on:  
roesy.chem.buffalo.edu-mercury300  
Archive directory:

Sample directory:

FidFile: CARBON

Pulse Sequence: CARBON (s2pu1)  
Solvent: cdcl3  
Data collected on: Nov 3 2012

Temp. 99.0 C / 1272.2 K  
Operator: Sherry

Relax. delay 5.000 sec  
Pulse 45.0 degrees  
Acq. time 0.868 sec  
Width 18867.9 Hz  
320 repetitions  
OBSERVE C13, 75.4536400 MHz  
DECOUPLE H1, 300.0754430 MHz  
Power 38 dB  
continuously on  
WALTZ-16 modulated  
DATA PROCESSING  
Line broadening 0.5 Hz  
FT size 32768  
Total time 14780 hr, 58 min

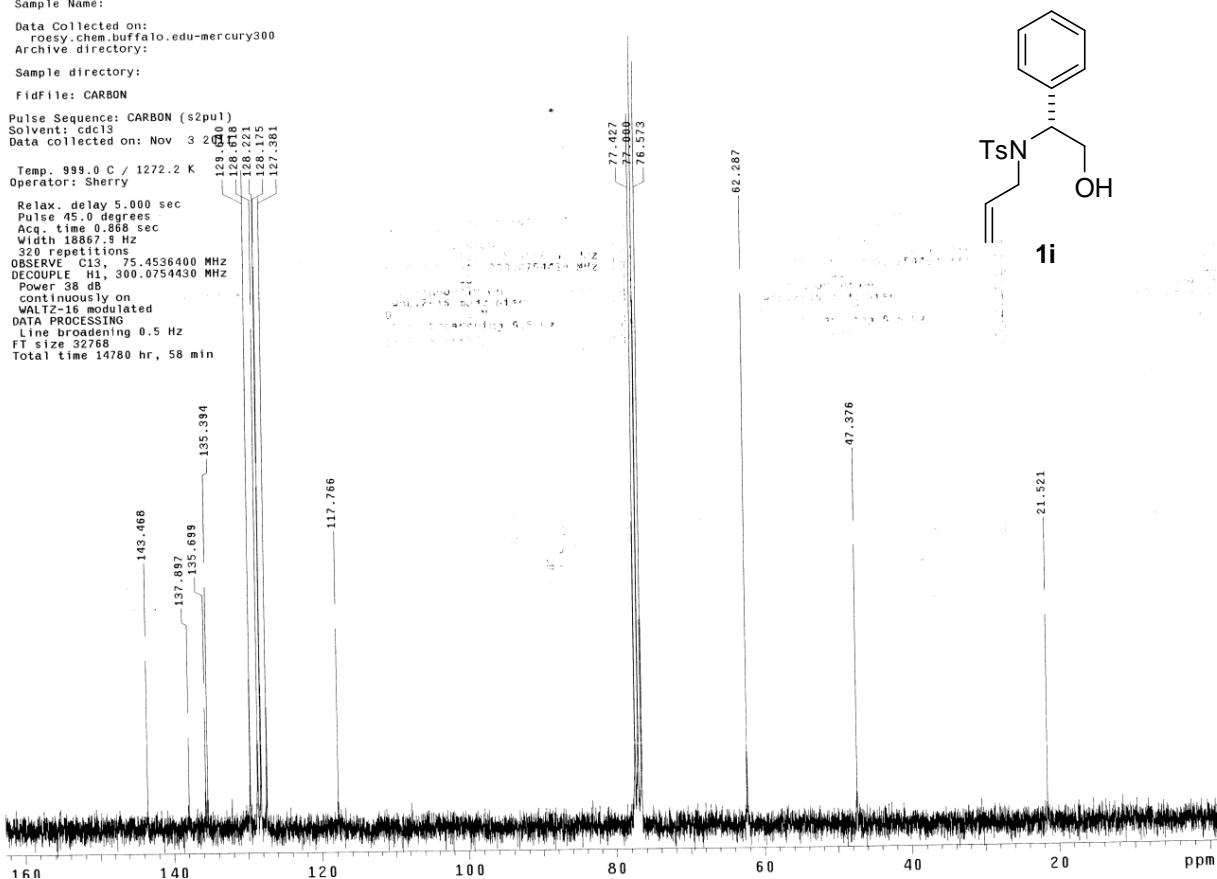

fs-IV-239-proton

Sample Name:

Data Collected on: chemmr400.chem.buffalo.edu-inova400  
Archive directory:

Sample directory:

Fidfile: PROTON

Pulse Sequence: PROTON (s2pul)  
Solvent: cdcl3  
Data collected on: Dec 29 2011

Temp. 25.0 C / 298.1 K  
Operator: Chemler

Relax. delay 2.000 sec  
Pulse 45.0 degrees  
Acq. time 2.565 sec  
Width 6387.7 Hz  
8 repetitions  
OBSERVE H1, 399.938020 MHz  
DATA PROCESSING  
FT size 32768  
Total time 0 min 29 sec

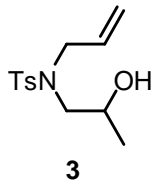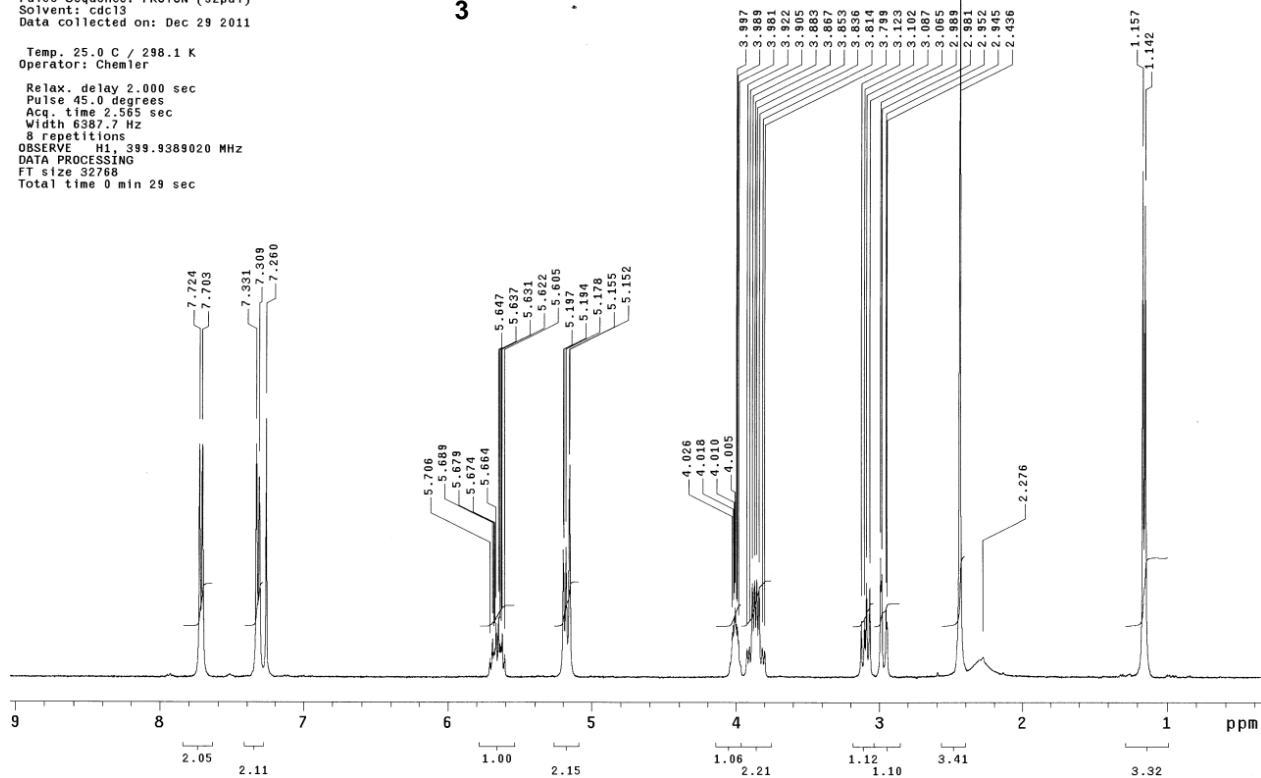

fs-IV-239-carbon  
Sample Name:  
Data Collected on: roesy.chem.buffalo.edu-mercury300  
Archive directory:  
Sample directory:  
Fidfile: CARBON  
Pulse Sequence: CARBON (s2pul)  
Solvent: cdcl3  
Data collected on: Nov 3 2011

Temp. 25.0 C / 298.1 K  
Operator: Sherry  
Relax. delay 1.000 sec  
Pulse 45.0 degrees  
Acq. time 0.958 sec  
Width 18867.8 Hz  
384 repetitions  
OBSERVE C13, 75.4538428 MHz  
DECOUPLE H1, 399.9754428 MHz  
Power 38 dB  
continuous ly on  
WALTZ-16 modulated  
DATA PROCESSING  
Sine broadening 0.5 Hz  
FT size 32768  
Total time 18576 hr, 17 min

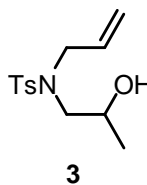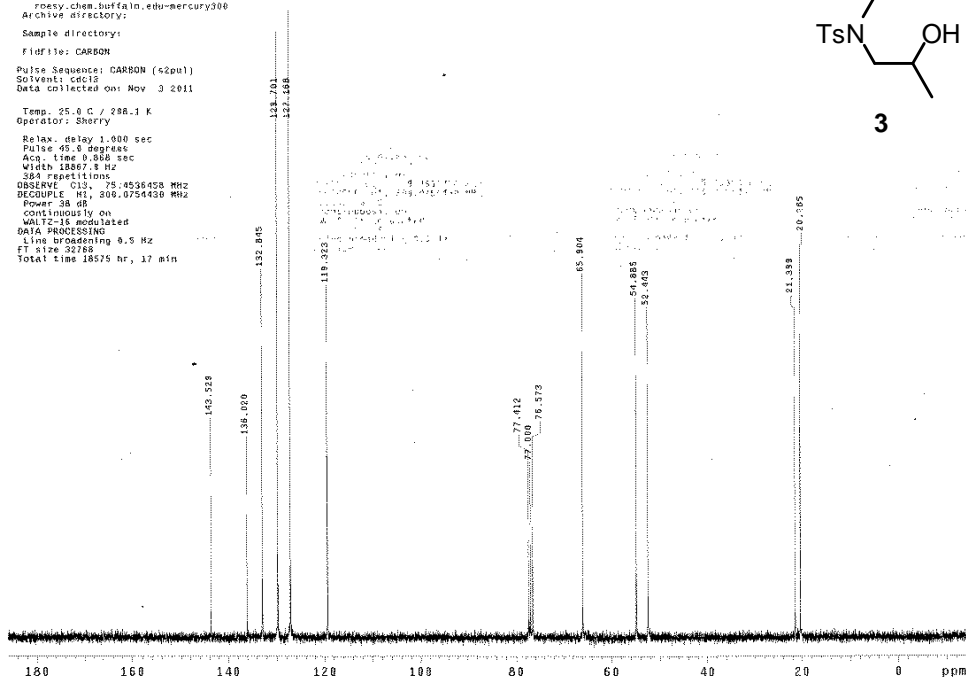

fs-III-207-hp1c

Sample Name:

Data Collected on:  
chemmp908.chem.buffalo.edu-inova500  
Archive directory:

Sample directory:

Fidfile: PROTON

Pulse Sequence: PROTON (s2pu1)

Solvent: cdcl3

Data collected on: Jul 14 2010

Operator: Chemler

Relax. delay 1.000 sec

Pulse 45.0 degrees

Acq. time 2.868 sec

Width 8000.0 Hz

0 repetitions

OBSERVE H1 498.8984211 MHz

DATA PROCESSING

FT size 32768

Total time 0 min 25 sec

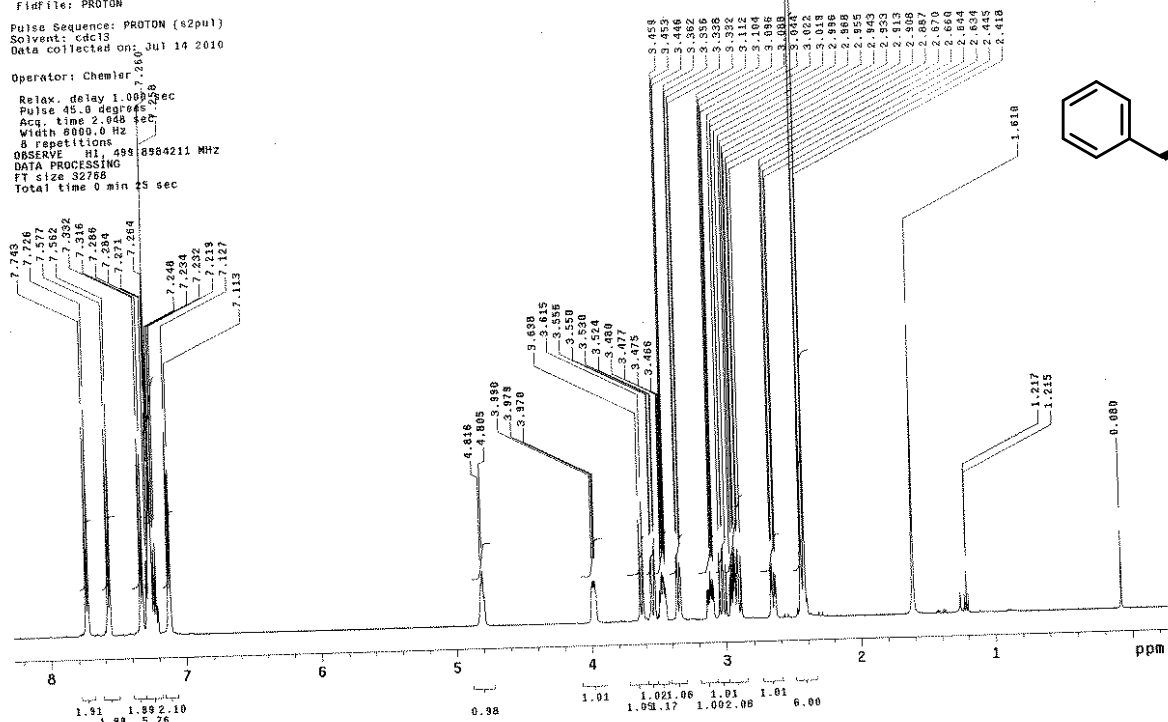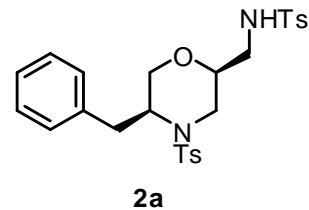

fs-III-207-carbon

Sample Name:

Data Collected on:  
roesy.chem.buffalo.edu-mercury300  
Archive directory:

Sample directory:

Fidfile: CARBON

Pulse Sequence: CARBON (s2pu1)

Solvent: cdcl3

Data collected on: Jul 16 2010

Operator: Chemler

Relax. delay 1.000 sec

Pulse 45.0 degrees

Acq. time 0.868 sec

Width 13867.9 Hz

25046 repetitions

OBSERVE C13, 75.4536375 MHz

DECOUPLE H1, 300.0754430 MHz

Power 38 dB

continuously on

WALTZ-16 modulated

DATA PROCESSING

Line broadening 0.5 Hz

FT size 32768

Total time 13 hr, 26 min

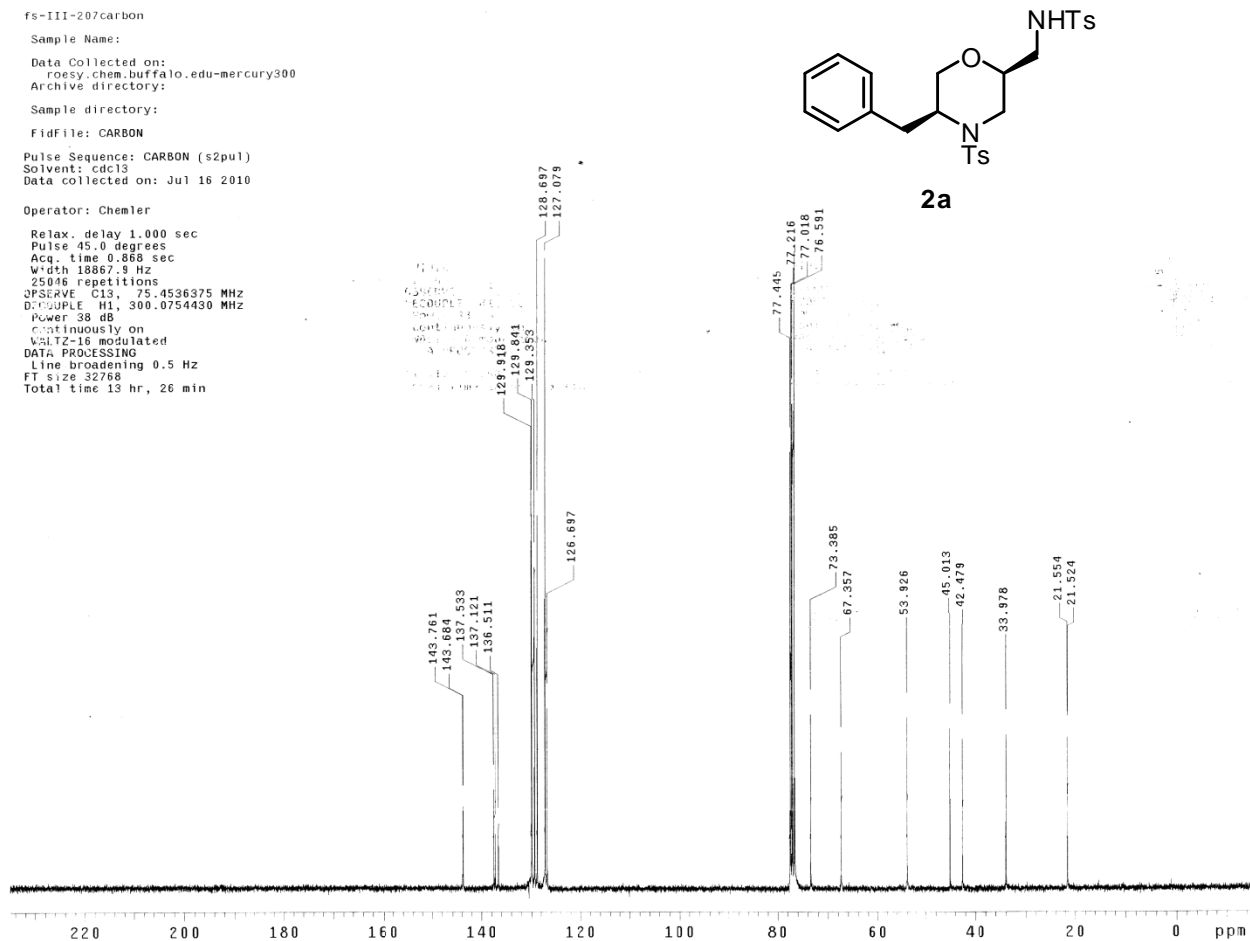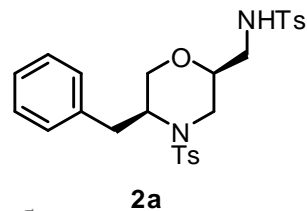



fs-III-234-proton  
 Sample Name:  
 Data Collected on:  
 chemnar480.chem.buffalo.edu-inova480  
 Archive directory:  
 Sample directory:  
 Fidfile: fs-III-234-proton  
 Pulse Sequence: PROTON (s2pu1)  
 Solvent: cdcl3  
 Data collected on: Jan 14 2012

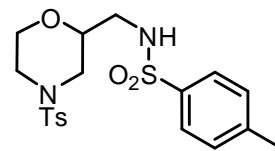

2b

Temp. 25.0 C / 298.1 K  
 Operator: Chemler  
 Relax. delay 2.000 sec  
 Pulse 45.0 degrees  
 Acq. time 2.505 sec  
 Width 6387.7 Hz  
 8 repetitions  
 OBSERVE H1, 399.9389015 MHZ  
 DATA PROCESSING  
 FT size 32768  
 Total time 0 min 29 sec

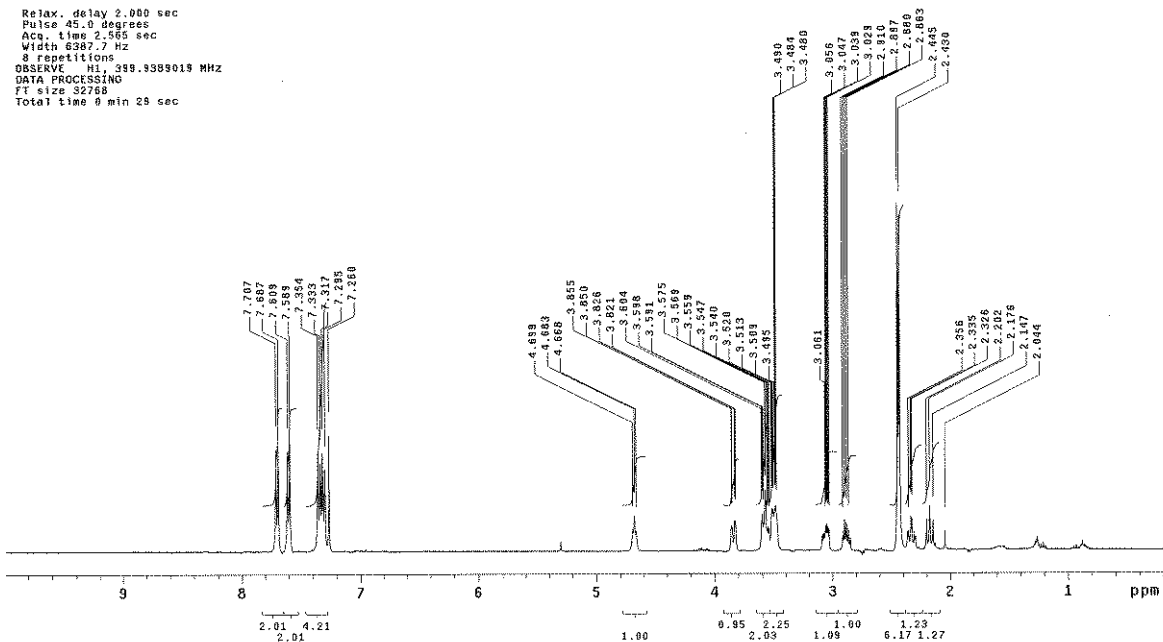

fs-III-234-carbon  
 Sample Name:  
 Data Collected on:  
 roesy.chem.buffalo.edu-mercury300  
 Archive directory:  
 Sample directory:  
 Fidfile: CARBON  
 Pulse Sequence: CARBON (s2pu1)  
 Solvent: cdcl3  
 Data collected on: Jan 13 2012

Temp. 22.0 C / 295.1 K  
 Operator: Sherry  
 Relax. delay 1.000 sec  
 Pulse 45.0 degrees  
 Acq. time 0.868 sec  
 Width 18867.9 Hz  
 25584 repetitions  
 OBSERVE C13, 75.4536375 MHZ  
 DECOUPLE H1, 300.0754430 MHZ  
 Power 38 dB  
 continuously on  
 WALTZ-16 modulated  
 DATA PROCESSING  
 Line broadening 0.5 Hz  
 FT size 32768  
 Total time 565060 hr, 45 min

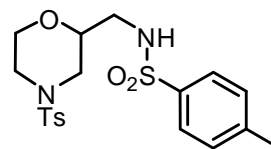

2b

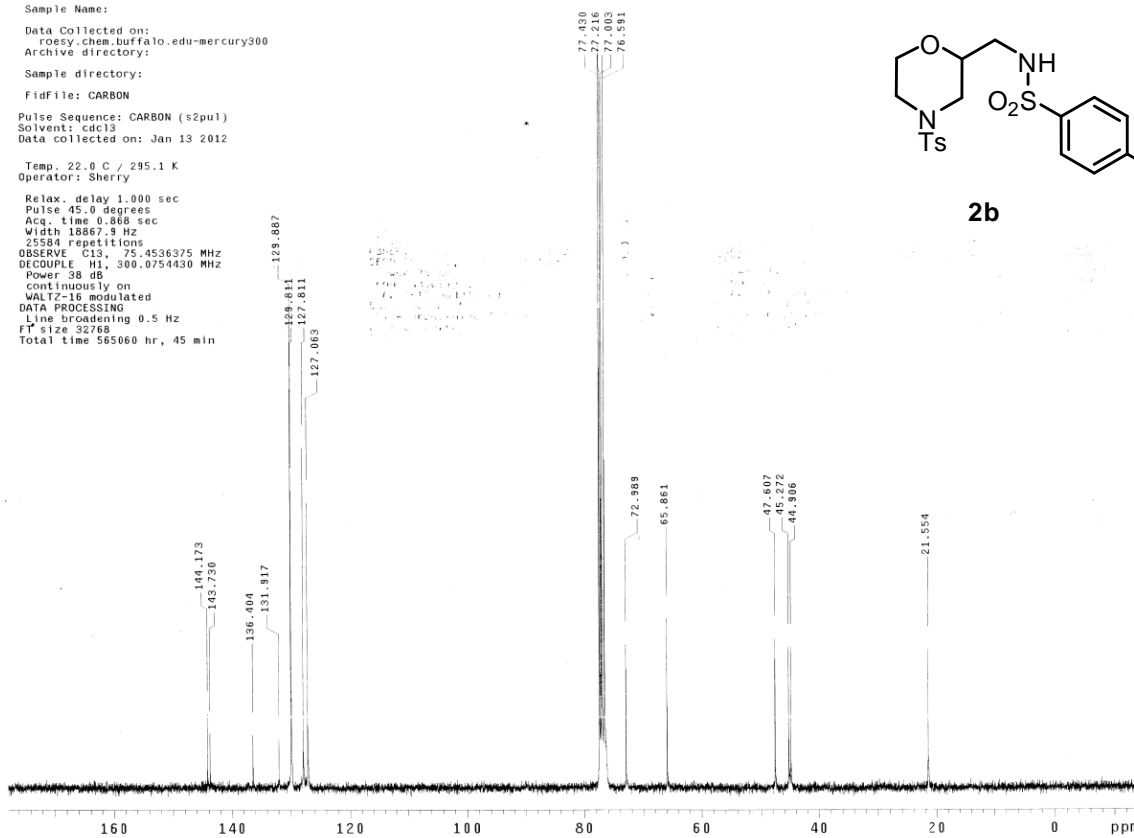

fs-SBQ *shery*  
 Sample Name:  
 Data Collected on:  
 chemmr400.chem.buffalo.edu-inova400  
 Archive directory:  
 Sample directory:  
 Fidfile: PROTON  
 Pulse Sequence: PROTON (s2pu1)  
 Solvent: cdcl3  
 Data collected on: Jan 21 2012

Temp. 25.0 C / 298.1 K  
 Operator: Chemter  
 Relax. delay 1.000 sec  
 Pulse 45.0 degrees  
 Acq. time 2.565 sec  
 Width 6387.7 Hz  
 8 repetitions  
 OBSERVE H1, 399.9389037 MHz  
 DATA PROCESSING  
 FT size 32768  
 Total time 0 min 29 sec

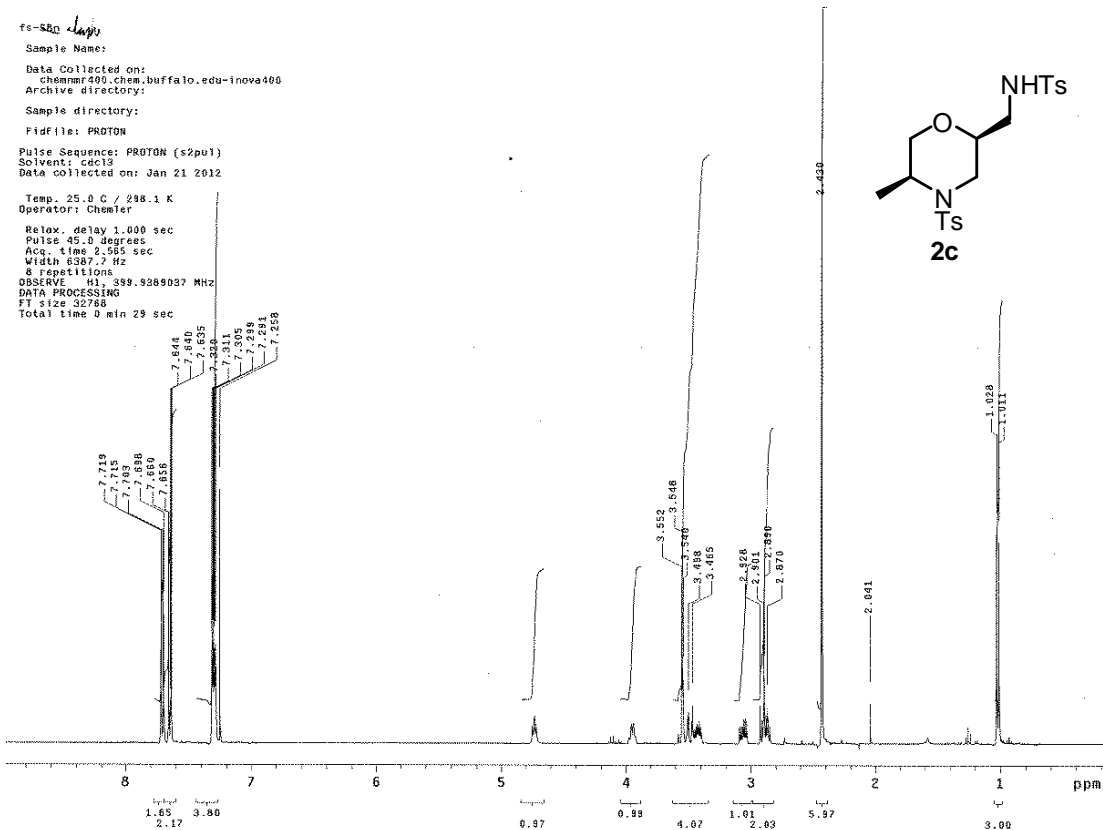

STANDARD PROTON PARAMETERS

Sample Name:  
 Data Collected on:  
 rosey.chem.buffalo.edu-mercury300  
 Archive directory:  
 Sample directory:  
 Fidfile: fs-v-78-carbon  
 Pulse Sequence: CARBON (s2pu1)  
 Solvent: cdcl3  
 Data collected on: Jan 19 2012

Temp. 22.0 C / 295.1 K  
 Operator: Shery  
 Relax. delay 1.000 sec  
 Pulse 45.0 degrees  
 Acq. time 0.868 sec  
 Width 18867.9 Hz  
 4464 repetitions  
 OBSERVE C13, 75.4536375 MHz  
 DECOUPLE H1, 399.0754450 MHz  
 Power 38 dB  
 continuously on  
 WALTZ-16 modulated  
 DATA PROCESSING  
 FT size 32768  
 Total time 118235 hr, 15 min

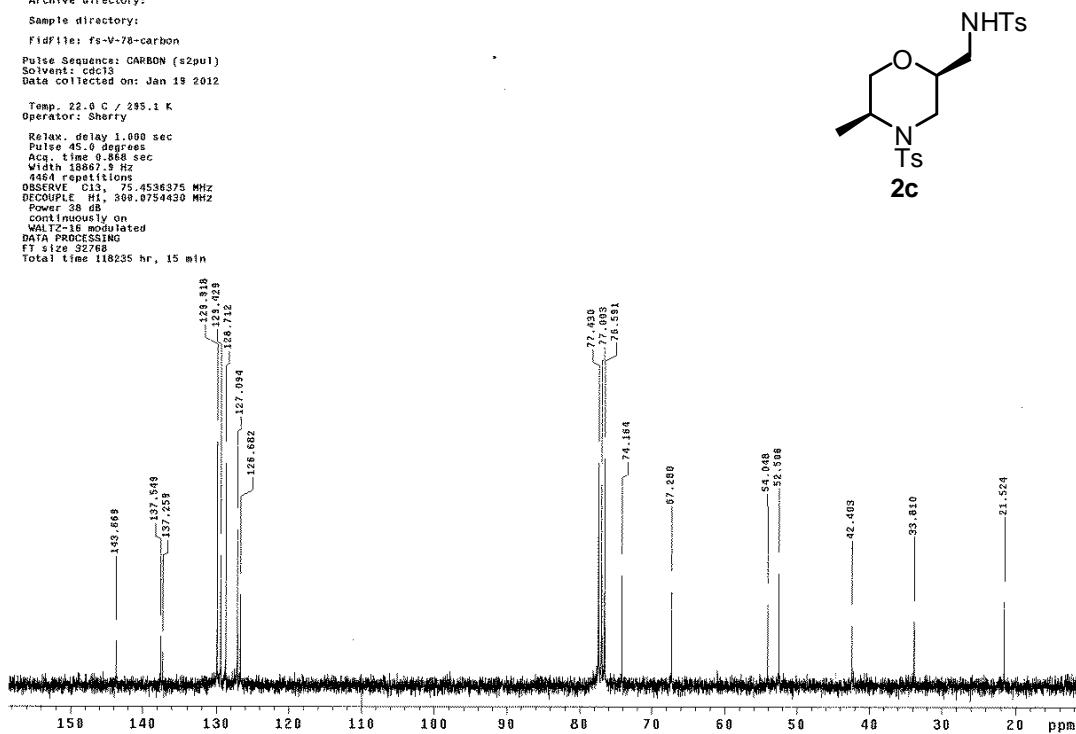

fs-1p-pro-carbon

Sample Name:

Data Collected on:  
chemm400.chem.buffalo.edu-inova400

Archive directory:

Sample directory:

Fidfile: PROTON

Pulse Sequence: PROTON (s2pu1)

Solvent: cdc13

Data collected on: Jan 17 2012

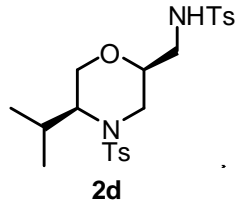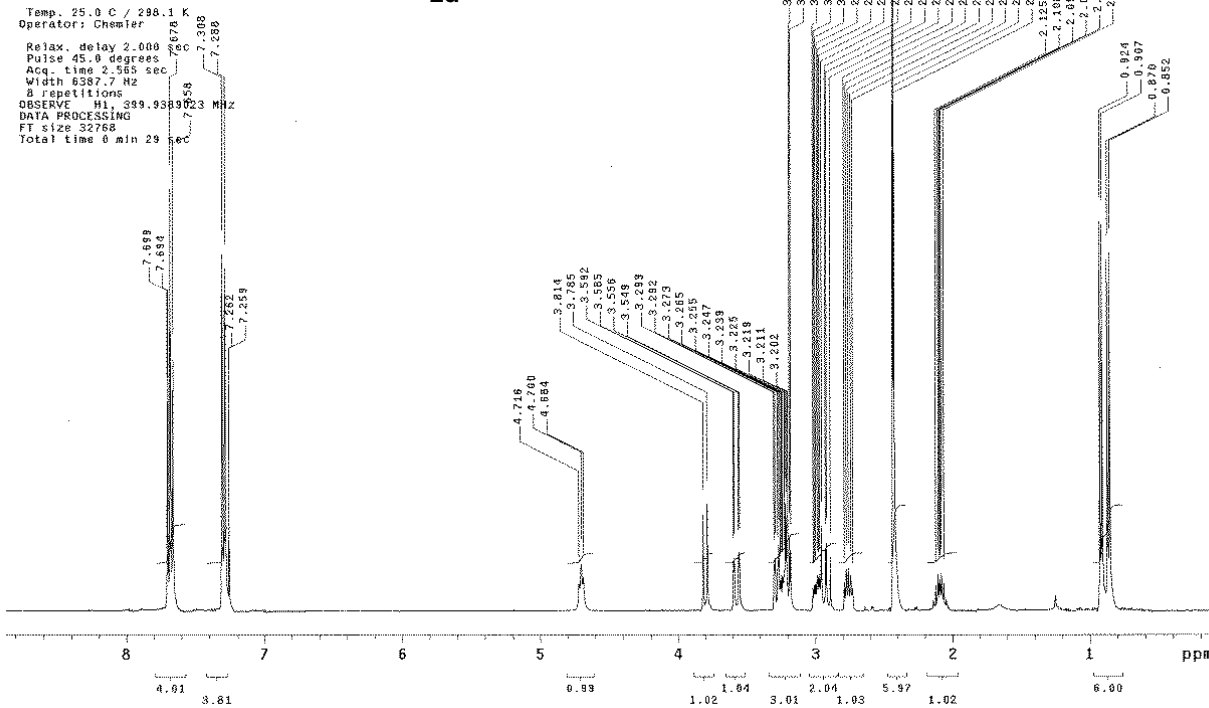

fs-111-1p-13c-trs-1-carbon

Sample Name:

Data Collected on:  
roesy.chem.buffalo.edu-mercury300

Archive directory:

Sample directory:

Fidfile: CARBON

Pulse Sequence: CARBON (s2pu1)

Solvent: cdc13

Data collected on: Aug 3 2010

Operator: Chemler

Relax. delay 2.000 sec

Pulse 45.0 degrees

Acq. time 0.868 sec

Width 18667.5 Hz

5616 repetitions

OBSERVE C13, 75.4536375 MHz

DECOUPLE H1, 300.0754430 MHz

Power 38 dB

continuously on

WALTZ-16 modulated

DATA PROCESSING

Line broadening 0.5 Hz

FT size 92768

Total time 23 hr, 30 min

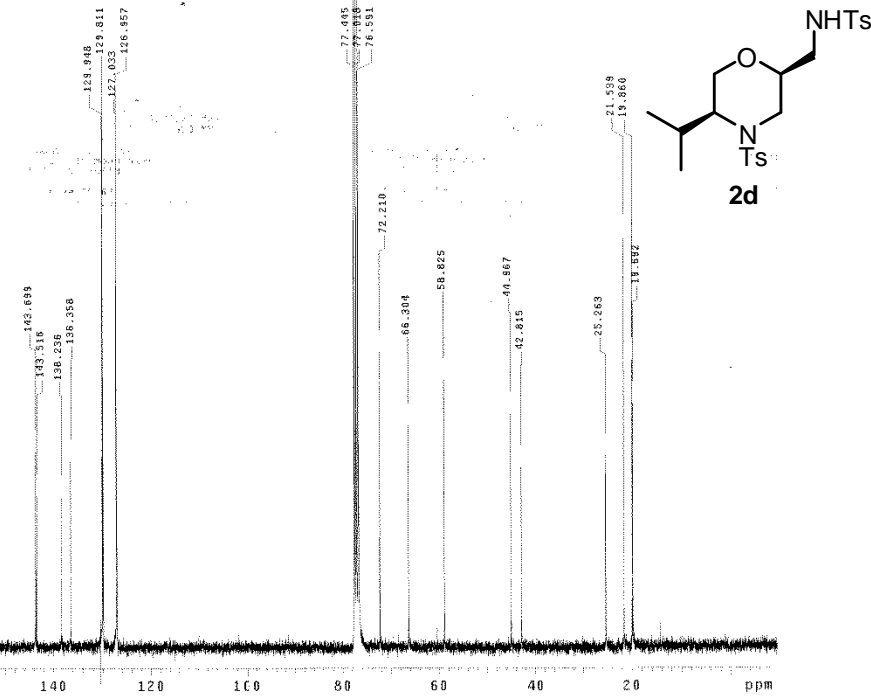



fs-II-12f-NMRreda

Sample Name:

Data Collected on:  
chemnar400.chem.buffalo.edu-inova400

Archive directory:

Sample directory:

Fidfile: PROTON

Pulse Sequence: PROTON (s2pu1)  
Solvent: cdcl3  
Data collected on: May 2 2012

Temp. 25.0 C / 298.1 K  
Operator: Chemler  
Relax. delay 1.000 sec  
Pulse 45.0 degrees  
Acq. time 2.585 sec  
Width 6387.7 Hz  
6 repetitions  
OBSERVE H1, 399.9388042 MHz  
DATA PROCESSING  
FT size 32768  
Total time 0 min 28 sec

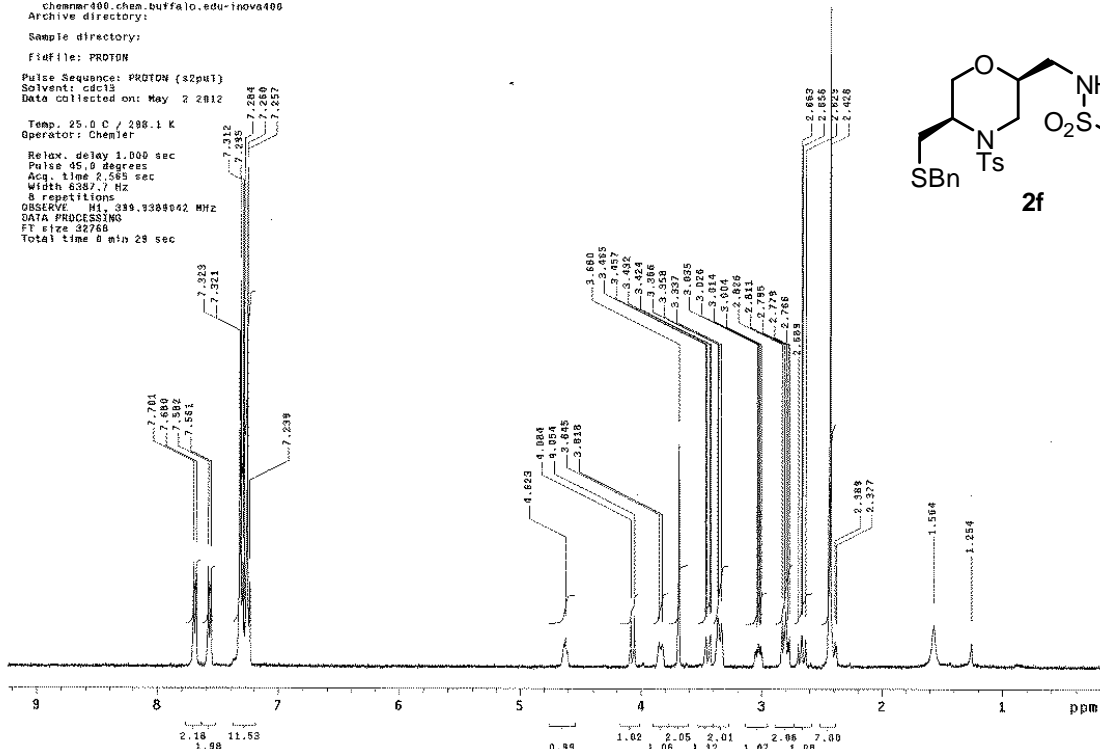

STANDARD CARBON PARAMETERS

Sample Name:

Data Collected on:  
roesy.chem.buffalo.edu-mercury300

Archive directory:

Sample directory:

Fidfile: CARBON

Pulse Sequence: CARBON (s2pu1)  
Solvent: cdcl3  
Data collected on: Jan 25 2012

Temp. 22.0 C / 295.1 K  
Operator: Sherry

Relax. delay 6.000 sec  
Pulse 45.0 degrees  
Acq. time 0.868 sec  
Width 18867.9 Hz  
6544 repetitions  
OBSERVE C13, 75.4536375 MHz  
DECOUPLE H1, 300.0754430 MHz  
Power: 38 dB  
continuously on  
WALTZ-16 modulated  
DATA PROCESSING  
Line broadening 0.5 Hz  
FT size 32768  
Total time 89761 hr, 29 min

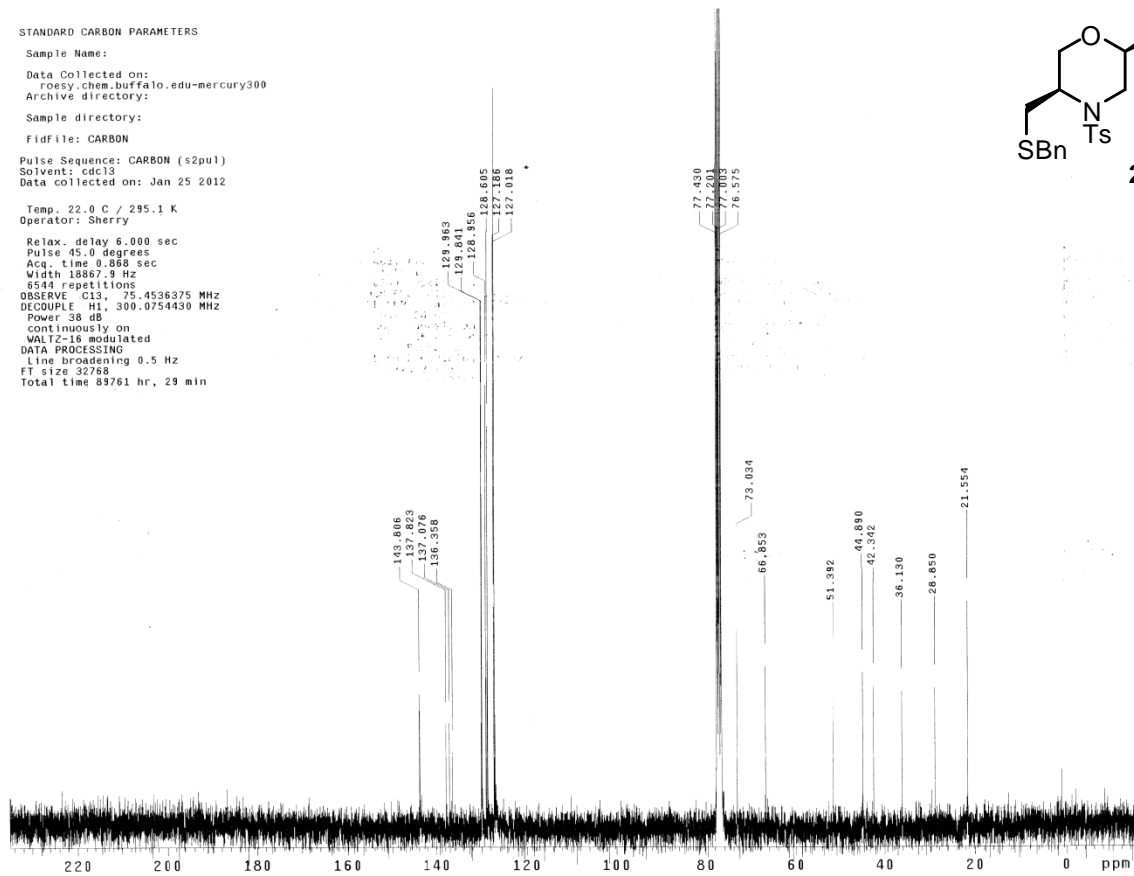

fs-V-77

Sample Name:

Data Collected on:  
chemmr500.chem.buffalo.edu-inova500  
Archive directory:

Sample directory:

Fidfile: PROTON

Pulse Sequence: PROTON (s2pul)  
Solvent: cdcl3  
Data collected on: Jan 20 2012

Operator: Chemler

Relax. delay 2.000 sec  
Pulse 45.0 degrees  
Acq. time 2.048 sec  
Width 8000.0 Hz  
8 repetitions  
OBSERVE H1 499.8984089 MHz  
DATA PROCESSING  
FT size 32768  
Total time 0 min 32 sec

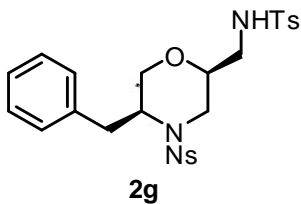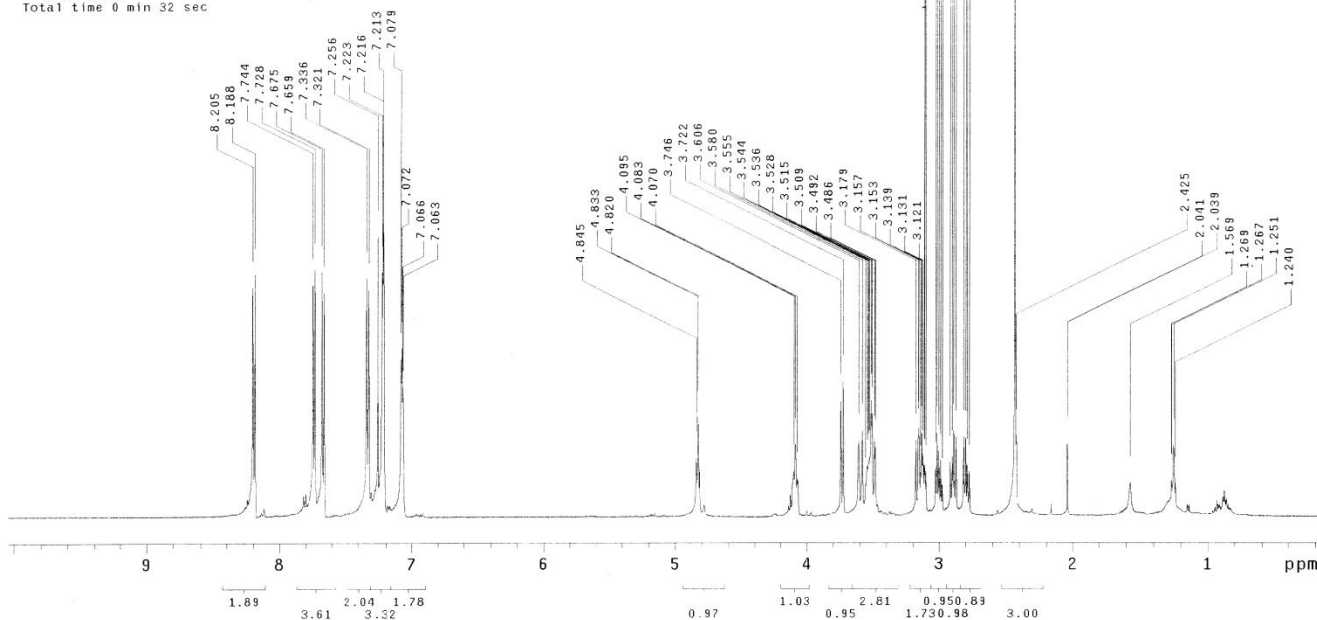

fs-IV-236-carbon

Sample Name:

Data Collected on:  
roesy.chem.buffalo.edu-mercury300  
Archive directory:

Sample directory:

Fidfile: fs-IV-236-carbon

Pulse Sequence: CARBON (s2pul)  
Solvent: cdcl3  
Data collected on: Oct 17 2011

Temp. 25.0 C / 298.1 K  
Operator: Sherry

Relax. delay 7.000 sec  
Pulse 45.0 degrees  
Acq. time 0.868 sec  
Width 18867.9 Hz  
812 repetitions  
OBSERVE C13 76.4536366 MHz  
DECOUPLE H1 300.0754430 MHz  
Power 38 dB  
continuously on  
WALTZ-16 modulated  
DATA PROCESSING  
Line broadening 0.5 Hz  
FT size 32768  
Total time 2231746 hr, 50 min

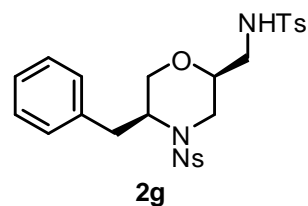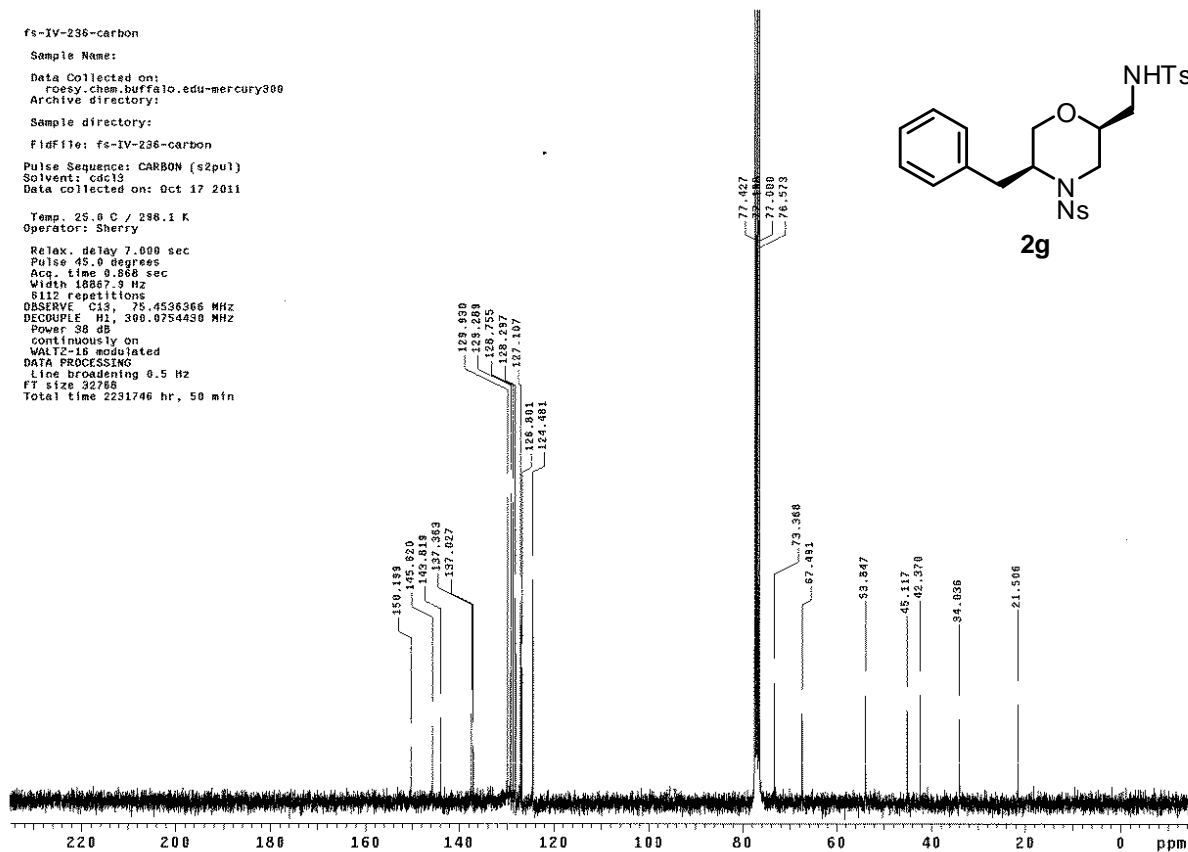







fs-IV-236-proton

Sample Name:

Data Collected on:  
Chemmr400.chem.buffalo.edu-inova400

Archive directory:

Sample directory:

FidFile: PROTON

Pulse Sequence: PROTON (s2pu1)

Solvent: cdcl3

Data Collected on: Oct 18 2011

Temp. 25.0 C / 298.1 K

Operator: Chemler

Relax. delay 1.000 sec

Pulse 45.0 degrees

Acq. time 2.565 sec

Width 6387.7 Hz

8 repetitions

OBSERVE H1, 399.9389071 MHz

DATA PROCESSING

FT size 32768

Total time 0 min 28 sec

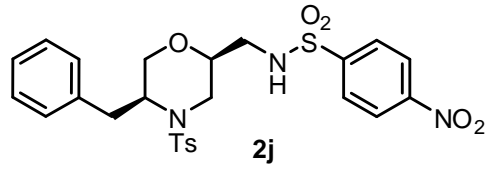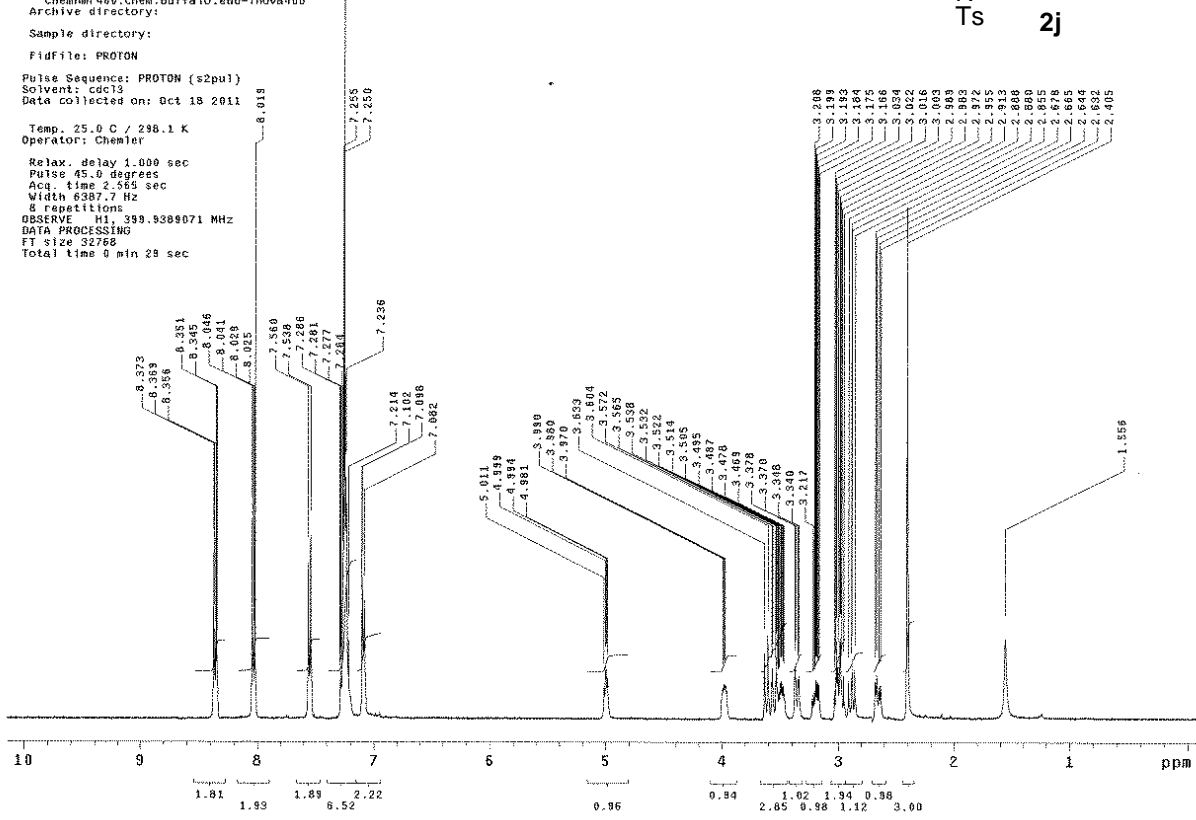

fs-IV-236-carbon

Sample Name:

Data Collected on:  
rosey.chem.buffalo.edu-mercury300

Archive directory:

Sample directory:

FidFile: CARBON

Pulse Sequence: CARBON (s2pu1)

Solvent: cdcl3

Data collected on: Oct 17 2011

Temp. 26.6 C / 299.8 K

Operator: Sherry

Relax. delay 7.000 sec

Pulse 45.0 degrees

Acq. time 0.868 sec

Width 18867.8 Hz

6112 repetitions

OBSERVE C13, 75.4536366 MHz

DECUPLE H1, 300.0754430 MHz

Power 38 dB

continuously on

WALTZ-16 modulated

DATA PROCESSING

Line broadening 0.5 Hz

FT size 32768

Total time 2291746 hr, 50 min

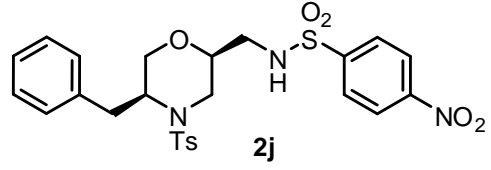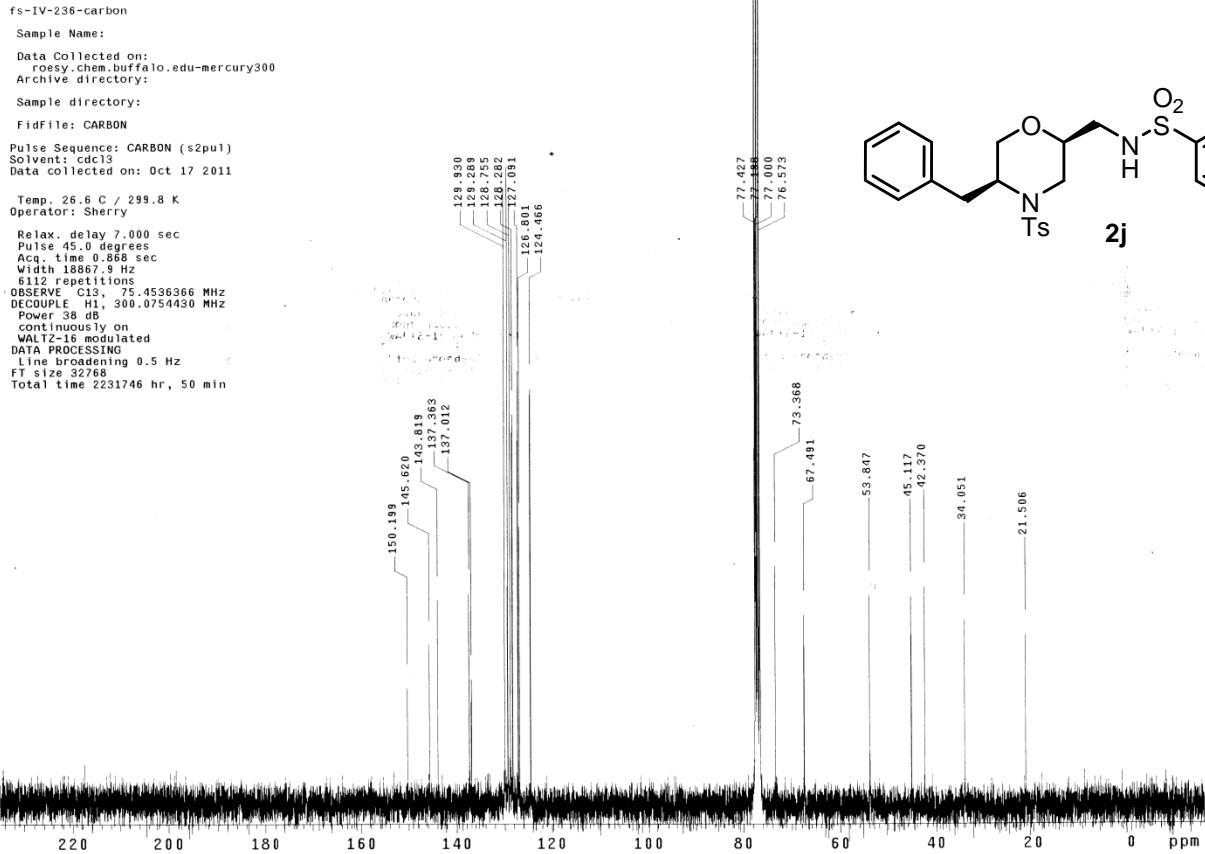

fs-IV-240-proton  
 Sample Name:  
 Data Collected on:  
 roesy.chem.buffalo.edu-mercury300  
 Archive directory:  
 Sample directory:  
 Fidfile: PROTON  
 Pulse Sequence: PROTON (s2pu1)  
 Solvent: cdcl3  
 Data collected on: Oct 12 2011  
 Temp. 25.0 C / 298.1 K  
 Operator: Sherry  
 Relax. delay 1.000 sec  
 Pulse 45.0 degrees  
 Acq. time 1.706 sec  
 Width 4803.1 Hz  
 8 repetitions  
 OBSERVE H1, 300.0738816 MHZ  
 DATA PROCESSING  
 FT size 16384  
 Total time 0 min 23 sec

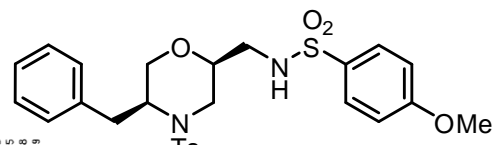

2k

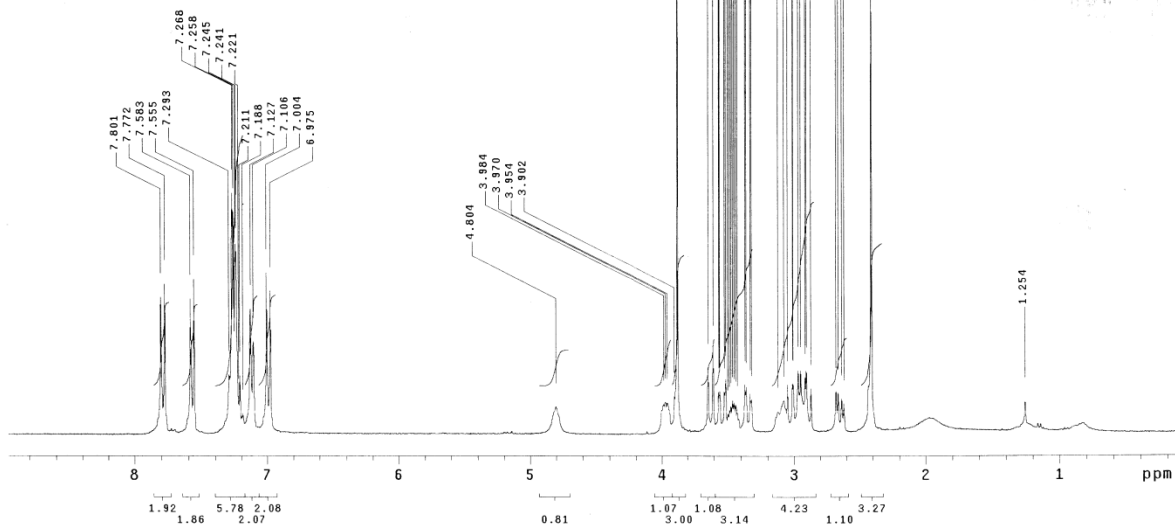

fs-IV-240-carbon  
 Sample Name:  
 Data Collected on:  
 roesy.chem.buffalo.edu-mercury300  
 Archive directory:  
 Sample directory:  
 Fidfile: CARBON  
 Pulse Sequence: CARBON (s2pu1)  
 Solvent: cdcl3  
 Data collected on: Oct 12 2011  
 Temp. 25.0 C / 298.1 K  
 Operator: Sherry  
 Relax. delay 6.000 sec  
 Pulse 45.0 degrees  
 Acq. time 0.868 sec  
 Width 18867.9 Hz  
 1120 repetitions  
 OBSERVE C13, 75.4536375 MHZ  
 DECOUPLE H1, 300.0754430 MHZ  
 Power 38 dB  
 continuously on  
 WALTZ-16 modulated  
 DATA PROCESSING  
 Line broadening 0.5 Hz  
 FT size 32768  
 Total time 1953969 hr, 4 min

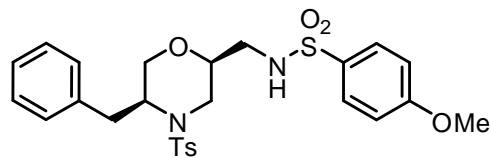

2k

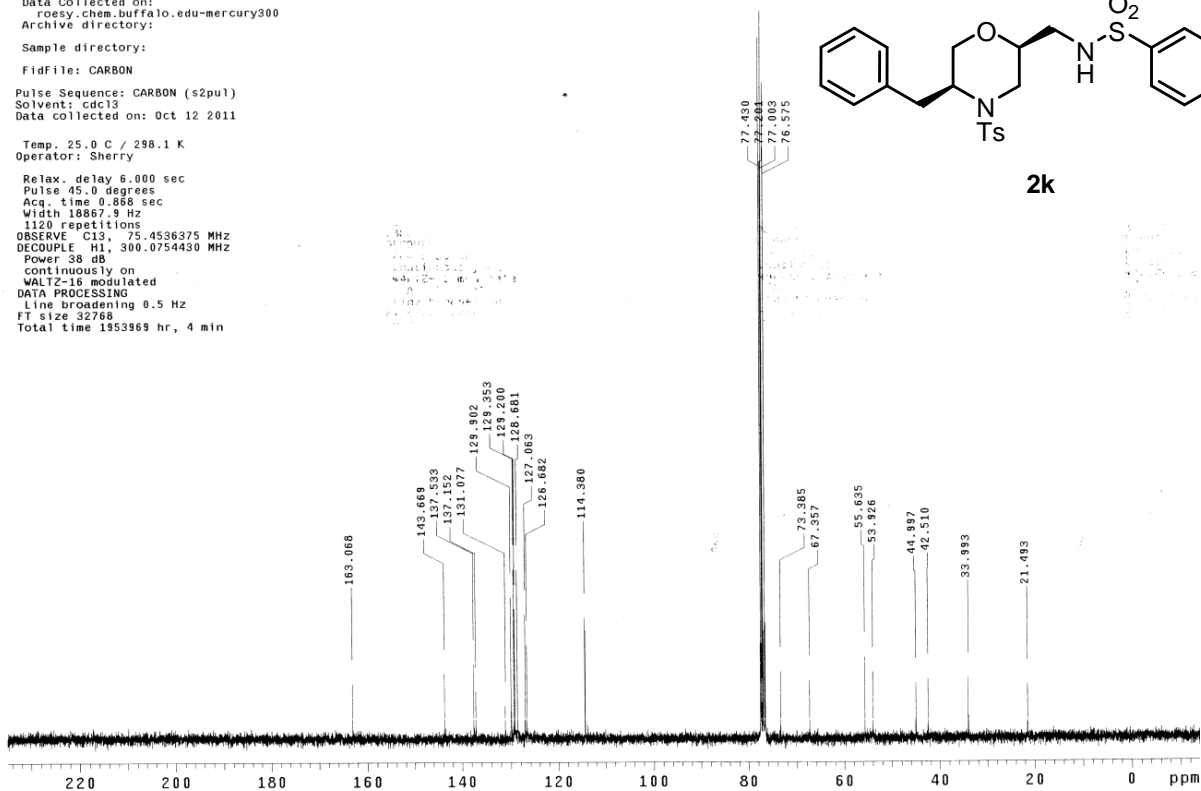

fs-v-mscap-major-1

Sample Name:  
DC-13Rf\_2  
Data Collected on:  
chemm300.chem.buffalo.edu-inova500  
Archive directory:  
Sample directory:  
FidFile: PRDTON

Pulse Sequence: PRDTON (s2pul)  
Solvent: cdcl3  
Data collected on: Jan 24 2012

Operator: Chewler

Relax. delay 1.000 sec  
Pulse 45.0 degrees  
Acq. time 2.048 sec  
Width 8000.0 Hz  
8 repetitions  
OBSERVE N1, 499.8984050 MHz  
DATA PROCESSING  
F1 size 32768  
Total time 0 min 24 sec

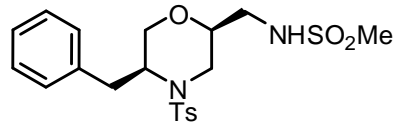

*cis*-21

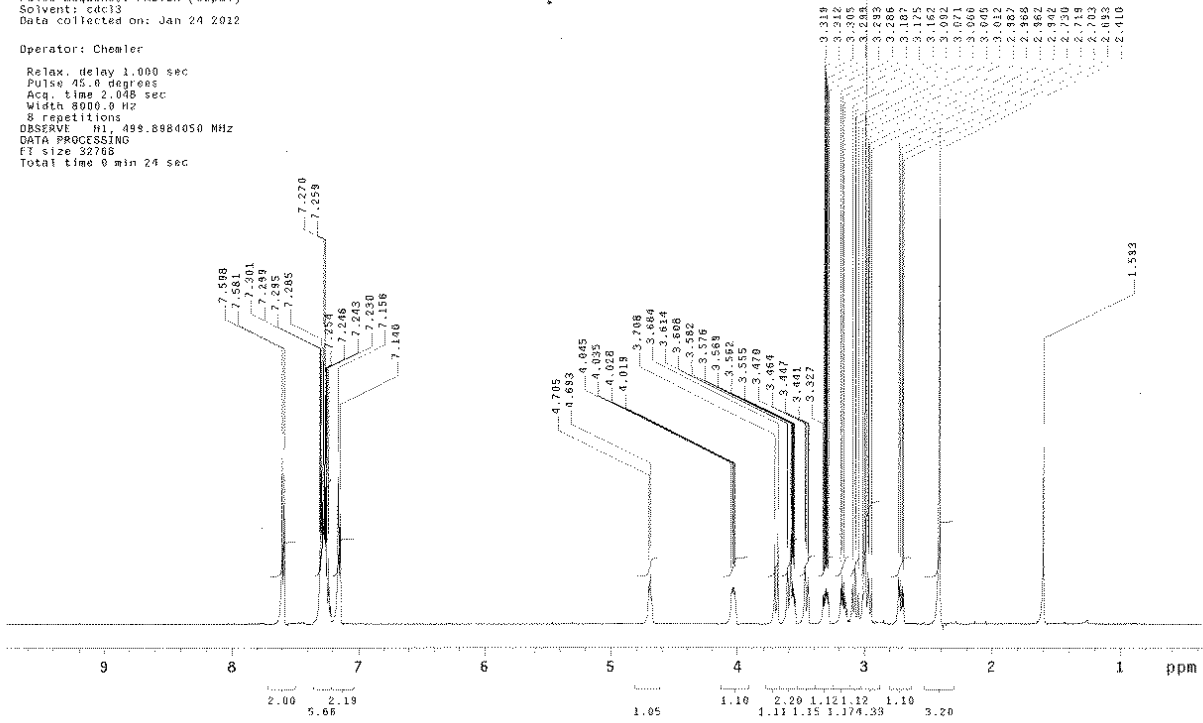

fs-v-83major-carbon

Sample Name:  
Data Collected on:  
roesy.chem.buffalo.edu-mercury300  
Archive directory:  
Sample directory:  
FidFile: CARBON

Pulse Sequence: CARBON (s2pul)  
Solvent: cdcl3  
Data collected on: Jan 24 2012

Temp. 22.0 C / 295.1 K  
Operator: Sherry

Relax. delay 1.000 sec  
Pulse 45.0 degrees  
Acq. time 0.868 sec  
Width 18867.9 Hz  
6352 repetitions  
OBSERVE C13, 75.4536389 MHz  
DECOUPLE H1, 300.0754430 MHz  
Power 38 dB  
continuously on  
WALTZ-16 modulated  
DATA PROCESSING  
Line broadening 0.5 Hz  
F1 size 32768  
Total time 27899 hr, 21 min

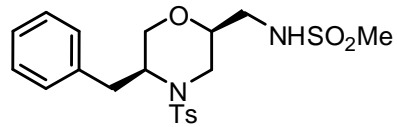

*cis*-21

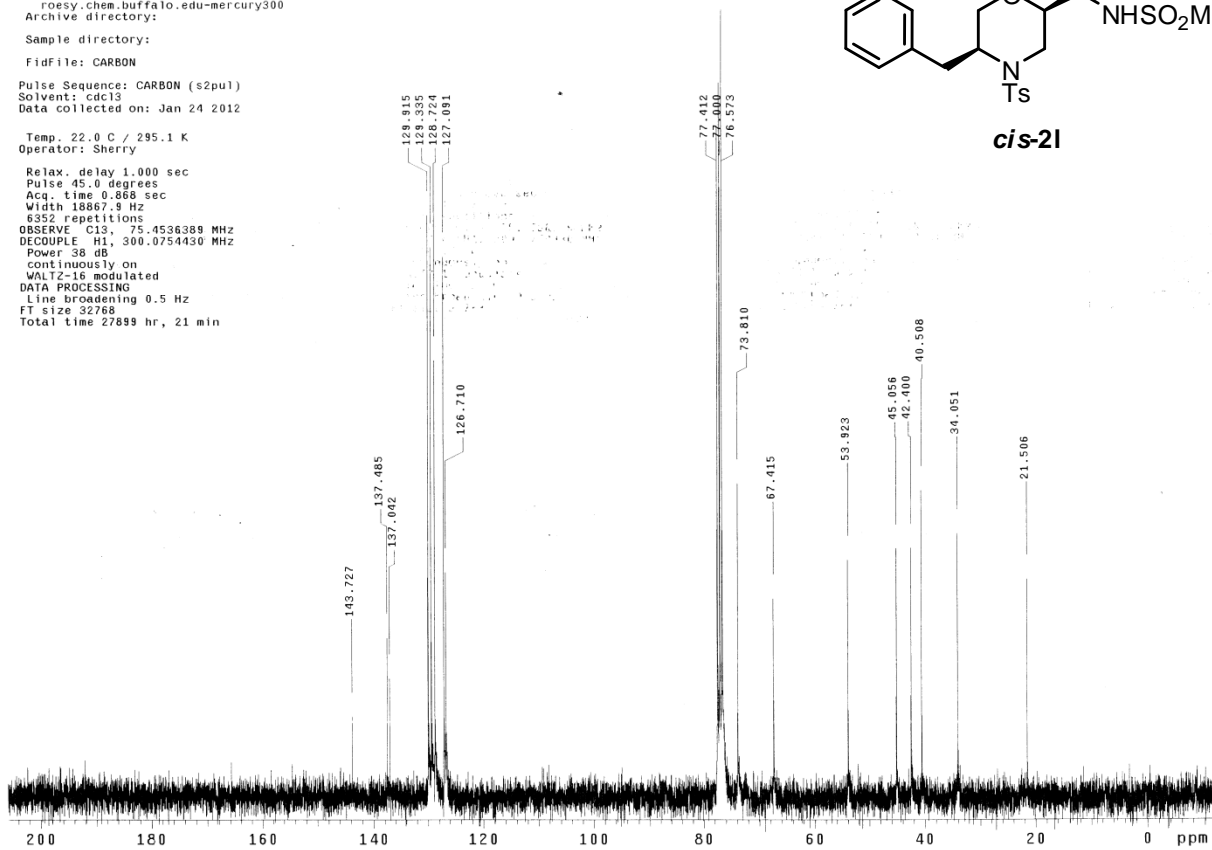

fs-V-82Ms-proton  
 Sample Name: DC-9CRUDE  
 Data Collected on: chemmr408.chem.buffalo.edu-inova409  
 Archive directory:  
 Sample directory:  
 FidFile: PROTON  
 Pulse Sequence: PROTON (s2pu1)  
 Solvent: cdc13  
 Data collected on: Jan 26 2012  
 Operator: Chemier  
 Relax. delay 1.000 sec  
 Pulse 45.0 degrees  
 Acq. time 2.395 sec  
 Width 6387.7 Hz  
 8 repetitions  
 OBSERVE H1, 359.9389019 MHz  
 DATA PROCESSING  
 FT size 32768  
 Total time 0 min 29 sec

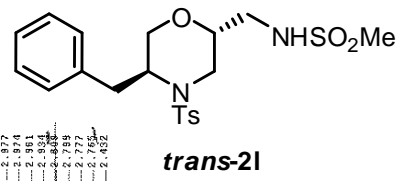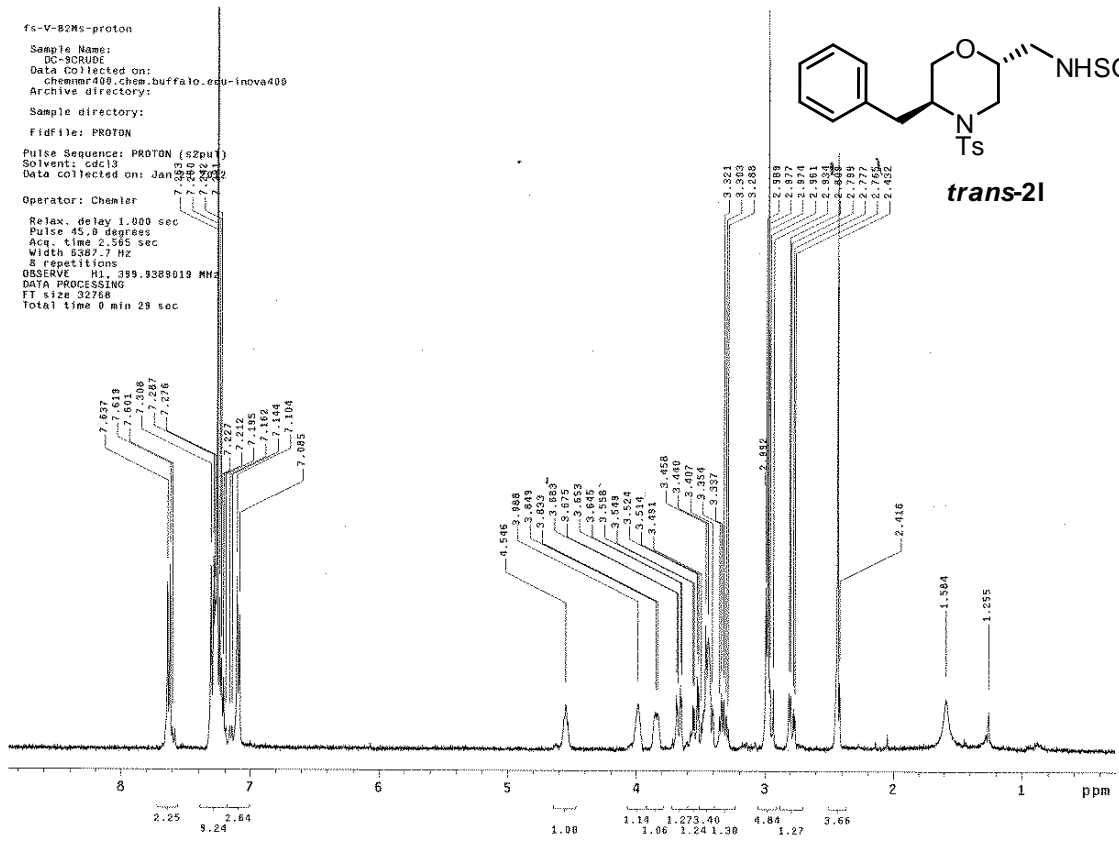

fs-V-MScapin  
 Sample Name:  
 Data Collected on: roesy.chem.buffalo.edu-mercury300  
 Archive directory:  
 Sample directory:  
 FidFile: CARBON  
 Pulse Sequence: CARBON (s2pu1)  
 Solvent: cdc13  
 Data collected on: Jan 26 2012  
 Temp. 22.0 C / 295.1 K  
 Operator: Sherry  
 Relax. delay 1.000 sec  
 Pulse 45.0 degrees  
 Acq. time 0.868 sec  
 Width 18867.3 Hz  
 24112 repetitions  
 OBSERVE C13, 75.4536375 MHz  
 DECOUPLE H1, 300.0754430 MHz  
 Power 38 dB  
 continuously on  
 WALTZ-16 modulated  
 DATA PROCESSING  
 Line Broadening 0.5 Hz  
 FT size 32768  
 Total time 2564 hr, 30 min

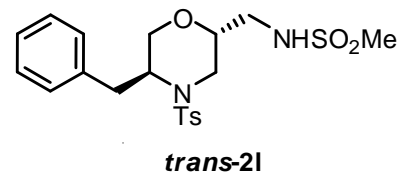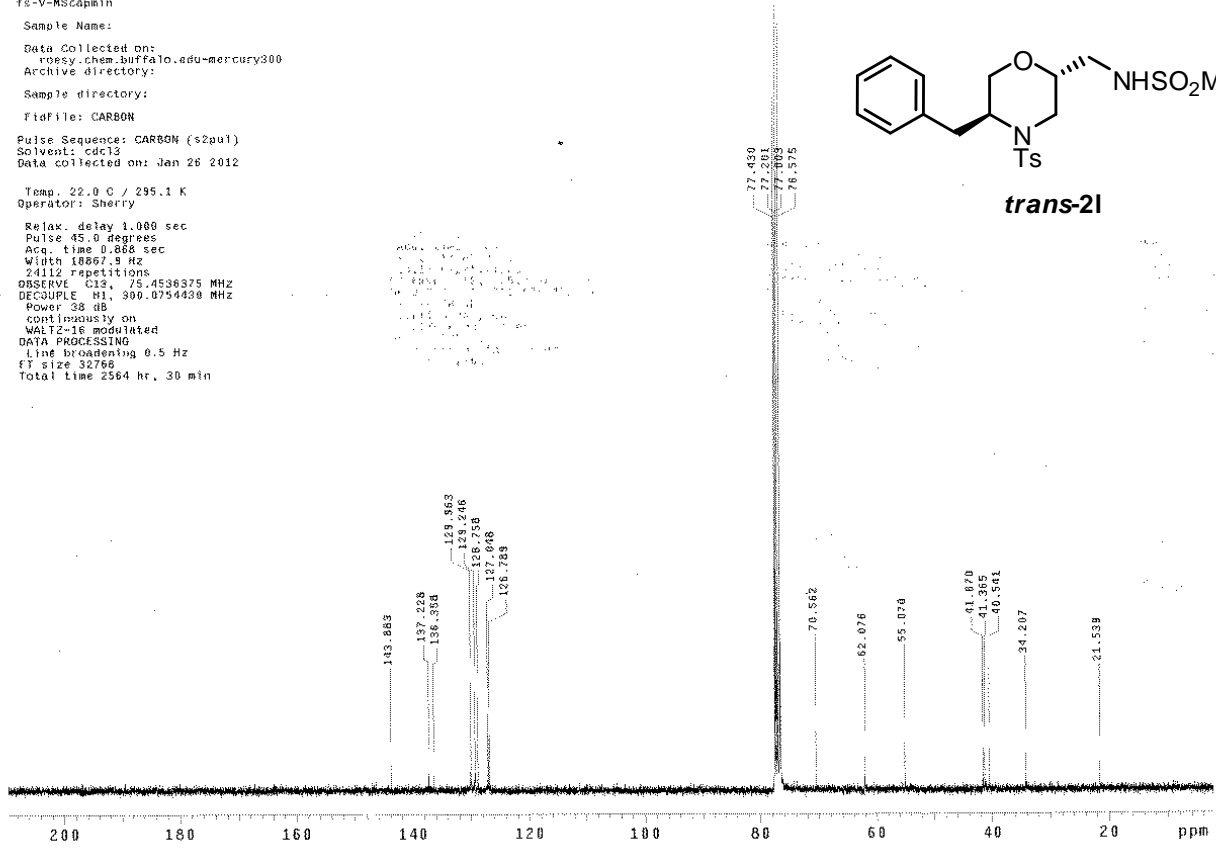

fs-IV-SES-prton2

Sample Name:

Data Collected on:  
chemnmr500.chem.buffalo.edu-inova500  
Archive directory:

Sample directory:

Fidfile: PROTON

Pulse Sequence: PROTON (s2pul)

Solvent: cdcl3

Data collected on: Jan 2 2012

Operator: Chemler

Relax. delay 1.700 sec  
Pulse 45.0 degrees  
Acq. time 2.048 sec  
Width 8000.0 Hz  
8 repetitions  
OBSERVE F1: 499.8984079 MHz  
DATA PROCESSING  
FT size 22758  
Total time 0 min 24 sec

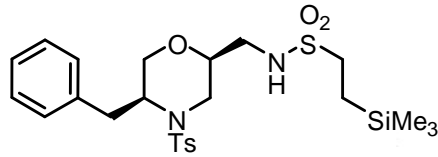

2m

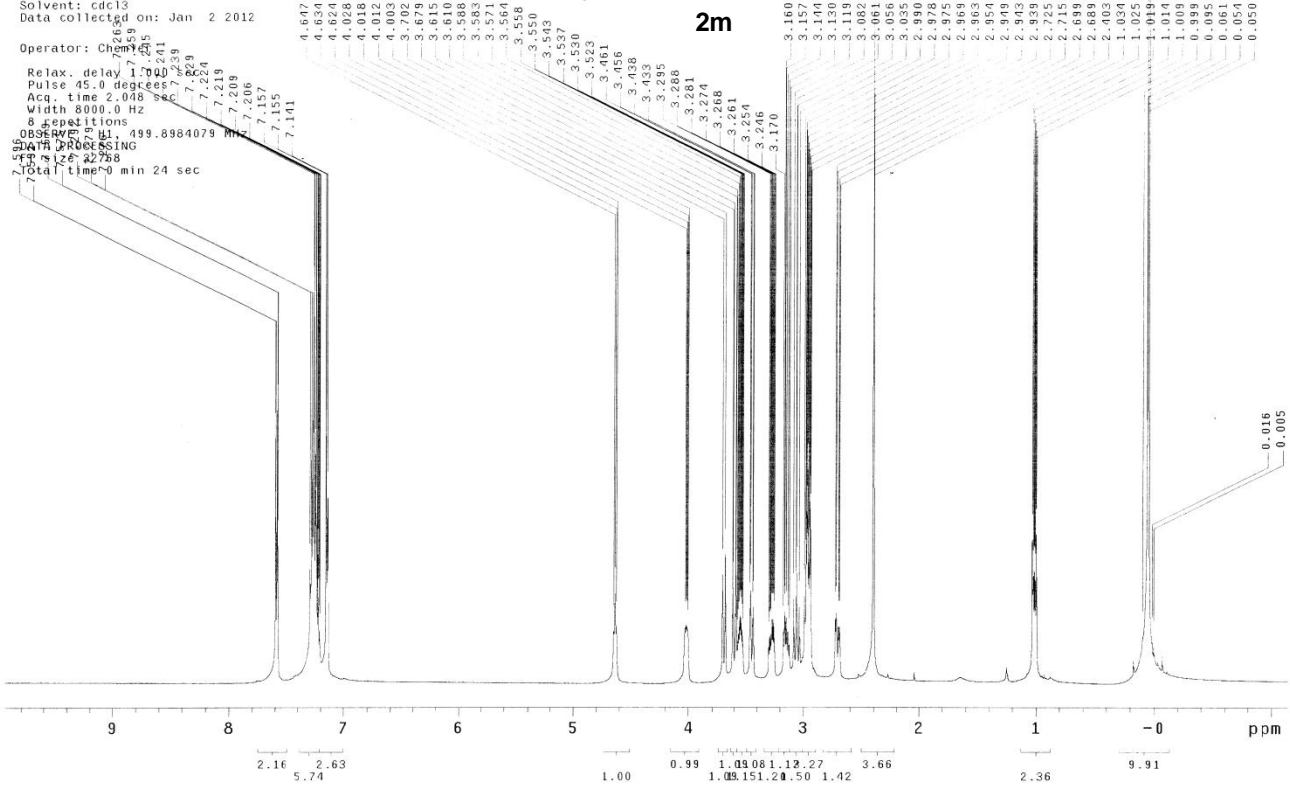

fs-IV-222-carbon

Sample Name:

Data Collected on:  
roesy.chem.buffalo.edu-mercury300  
Archive directory:

Sample directory:

Fidfile: fs-IV-222-carbon

Pulse Sequence: CARBON (s2pul)

Solvent: cdcl3

Data collected on: Aug 1 2011

Temp. 22.0 C / 295.1 K

Operator: Chemler

Relax. delay 1.000 sec  
Pulse 45.0 degrees  
Acq. time 0.868 sec  
Width 18867.9 Hz  
2080 repetitions  
OBSERVE C13, 75.4541732 MHz  
DECOUPLE H1, 300.0754430 MHz  
Power 38 dB  
continuously on  
WALTZ-16 modulated  
DATA PROCESSING  
Line broadening 0.5 Hz  
FT size 32768  
Total time 253 hr, 48 min

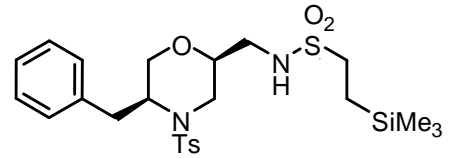

2m

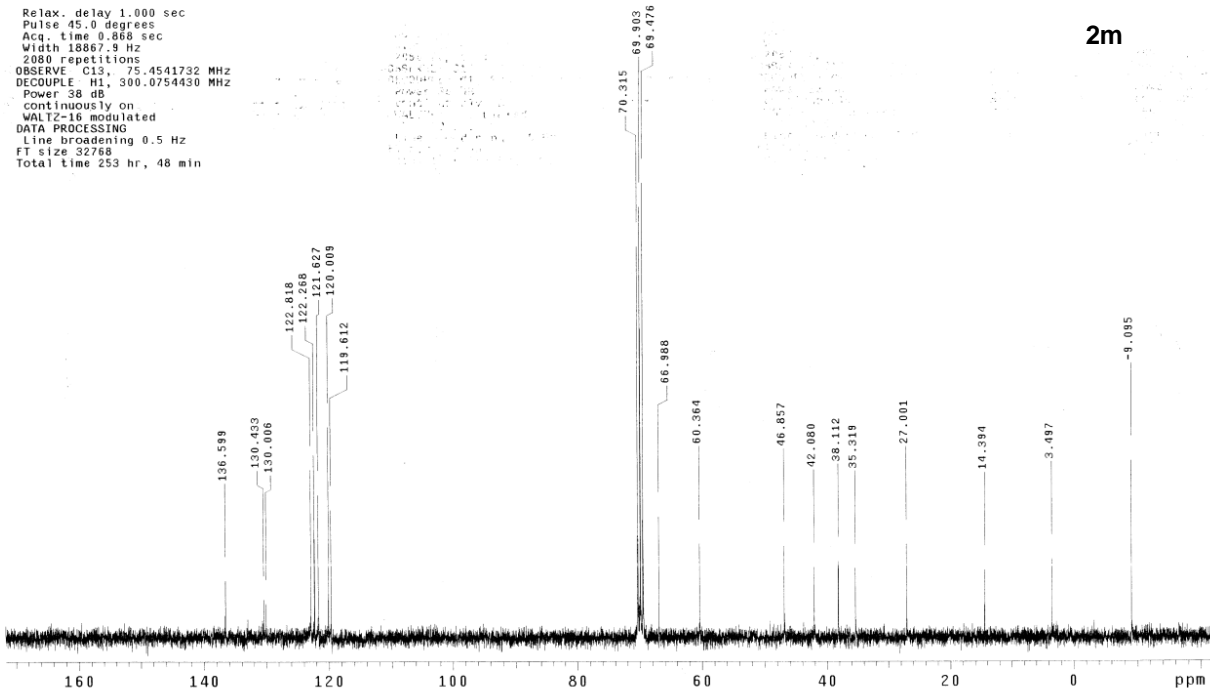

fs-V-Bzcapmajor-prton

Sample Name:  
DC34crude  
Data collected on:  
chemmr500.chem.buffalo.edu-inova500  
Archive directory:  
Sample directory:

FidFile: PROTDN

Pulse Sequence: PROTON (s2pul)  
Solvent: cdcl3  
Data collected on: Apr 18 2012

Temp: 25.0 C / 298.1 K

Operator: Chemler

Relax. delay 1.000 sec  
Pulse 45.0 degrees  
Acq. time 2.008 sec  
Width 3000.0 Hz  
8 repetitions  
OBSERVE H1, 499.8364064 MHz  
DATA PROCESSING  
FT size 32768  
Total time 0 min 24 sec

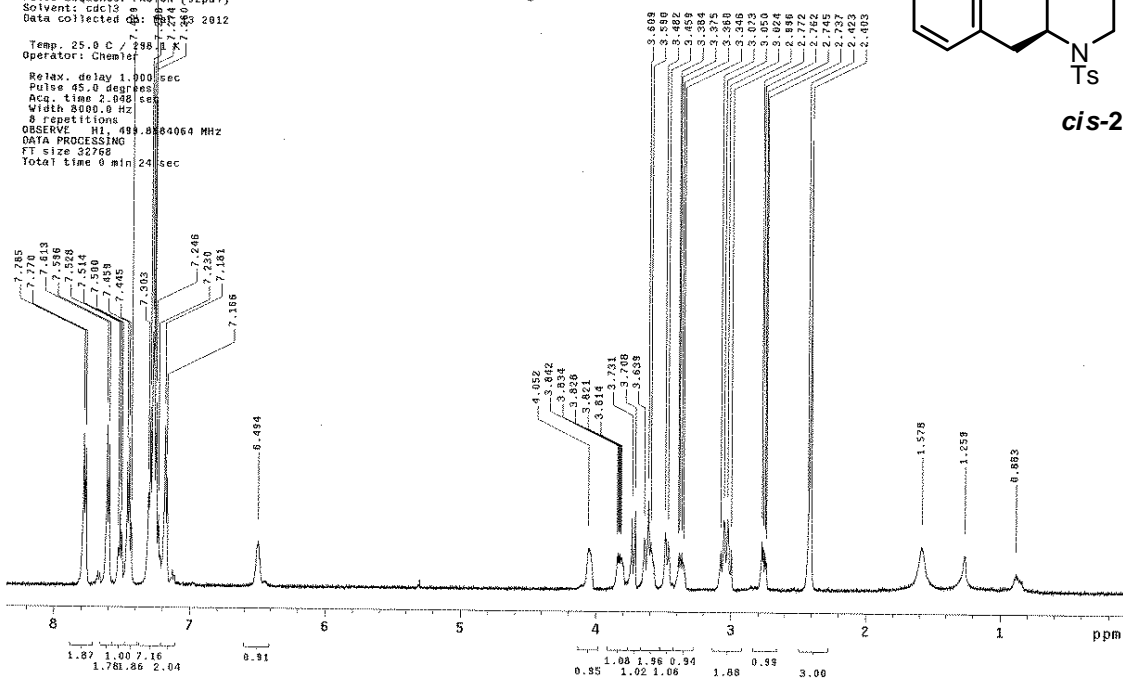

fs-IV-152-carbon

Sample Name:  
Data collected on:  
rossy.chem.buffalo.edu-mercury300  
Archive directory:

Sample directory:

FidFile: CARBON

Pulse Sequence: CARBON (s2pul)  
Solvent: cdcl3  
Data collected on: Apr 18 2011

Temp: 22.0 C / 295.1 K

Operator: Chemler

Relax. delay 5.000 sec  
Pulse 45.0 degrees  
Acq. time 0.868 sec  
Width 18867.3 Hz  
3095 repetitions  
OBSERVE C13, 75.4536375 MHz  
REQUIRE H1, 300.0254450 MHz  
Power 33 dB  
cc: 1100000  
Waltz-16 modulated  
DATA PROCESSING  
1.0 Hz broadening 0.5 Hz  
FT size 32768  
Total time 562578 hr, 34 min

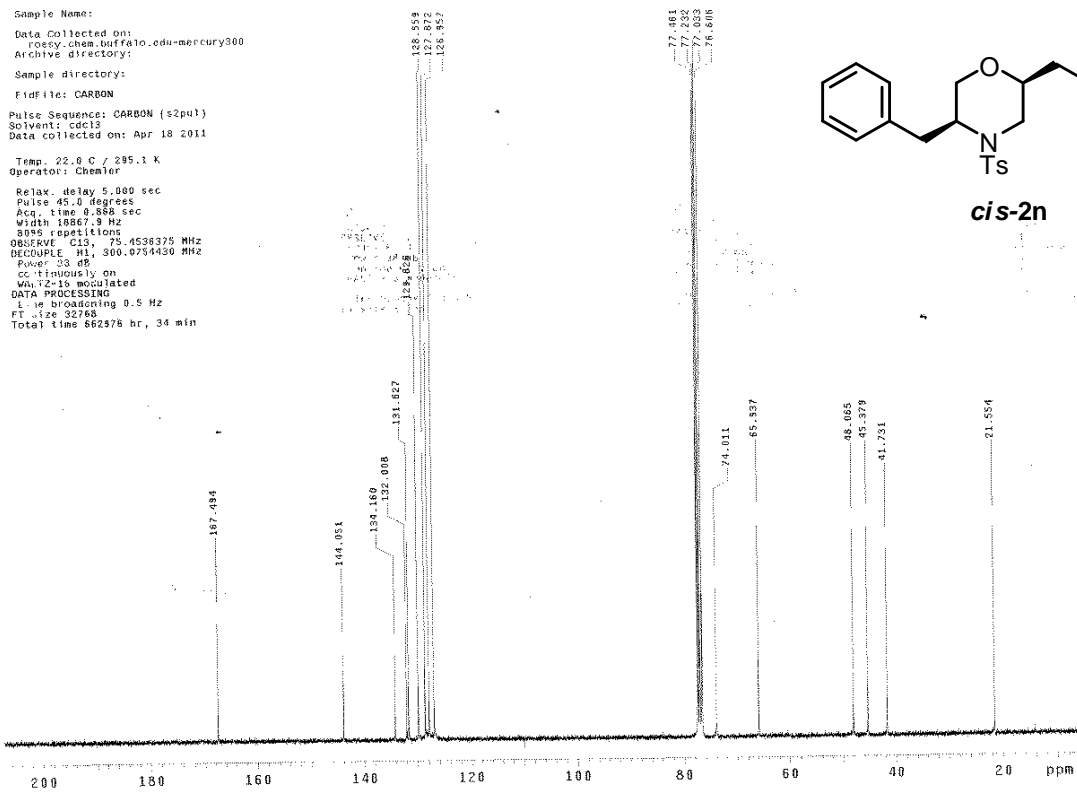

fs-IV-142-min  
 Sample Name:  
 Data Collected on:  
 chemmr400.chem.buffalo.edu-inova400  
 Archive directory:  
 Sample directory:  
 Fidfile: PROTON  
 Pulse Sequence: PROTON (s2pul)  
 Solvent: cdcl3  
 Data collected on: 7/26/11  
 Temp. 25.0 C / 298.1 K  
 Operator: Chemist  
 Relax. delay 1.000 sec  
 Pulse 45.0 degrees  
 Acq. time 2.565 sec  
 Width 6387.7 Hz  
 8 repetitions  
 OBSERVE M1, 398.9023 MHz  
 DATA PROCESSING  
 FT size 32768  
 Total time 0 min 39 sec

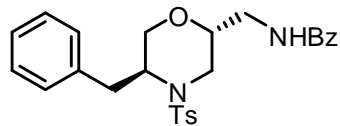

**trans-2n**

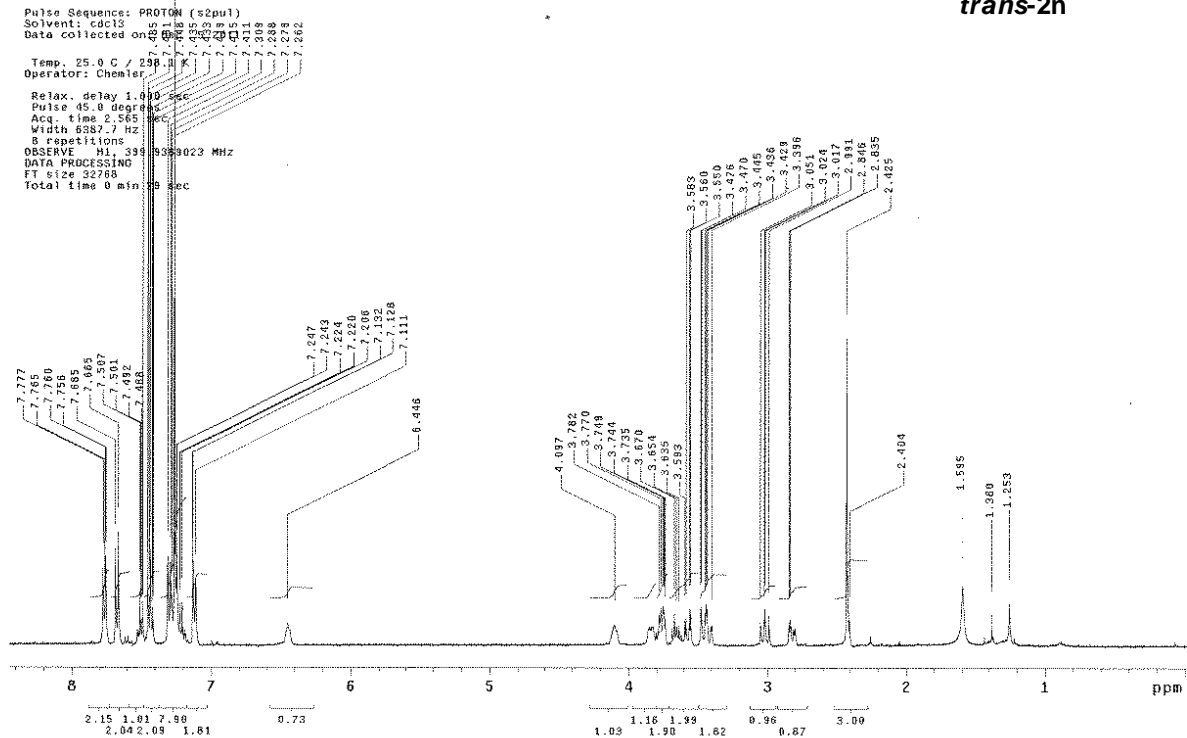

fs-IV-142-minor  
 Sample Name:  
 Data Collected on:  
 roesy.chem.buffalo.edu-mercury300  
 Archive directory:  
 Sample directory:  
 Fidfile: fs-IV-142-minor-carbon  
 Pulse Sequence: CARBON (s2pul)  
 Solvent: cdcl3  
 Data collected on: Nov 21 2011  
 Temp. 25.0 C / 298.1 K  
 Operator: Sherry  
 Relax. delay 1.000 sec  
 Pulse 45.0 degrees  
 Acq. time 0.888 sec  
 Width 16867.9 Hz  
 23024 repetitions  
 OBSERVE C13, 75.4536375 MHz  
 DECOUPLE H1, 300.0754430 MHz  
 Power 38 dB  
 continuously on  
 WALTZ-16 modulated  
 DATA PROCESSING  
 Line broadening 0.5 Hz  
 FT size 32768  
 Total time 2472 hr, 39 min

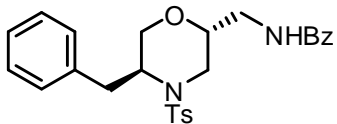

**trans-2n**

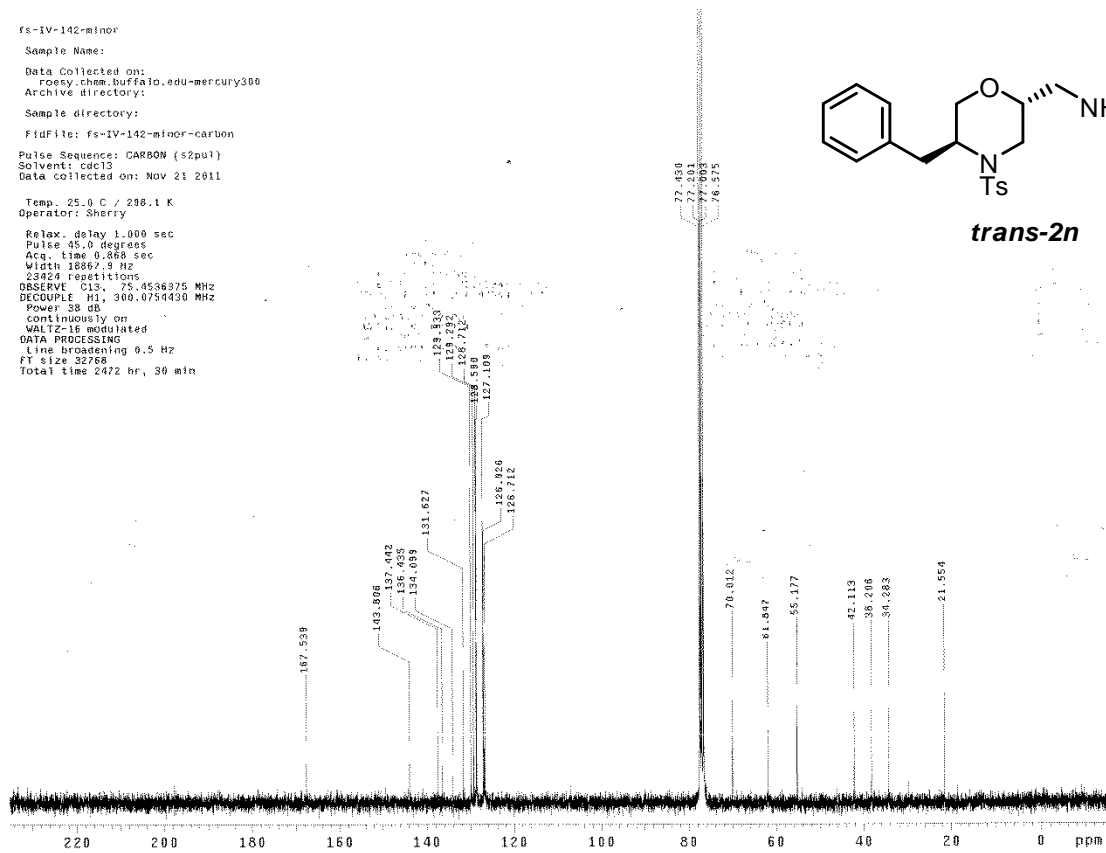

fs-cis-II-27dNMR  
 Sample Name:  
 Data Collected on:  
 roesy.chem.buffalo.edu-mercury300  
 Archive directory:  
 Sample directory:  
 Fidfile: PROTON  
 Pulse Sequence: PROTON (s2pu1)  
 Solvent: cdcl3  
 Data collected on: Apr 30 2012  
 Temp: 22.6 C / 295.1 K  
 Operator: Sherry  
 Relax. delay 1.600 sec  
 Pulse 45.0 degrees  
 Acq. time 1.706 sec  
 Width 4803.1 Hz  
 128 repetitions  
 OBSERVE H1, 300.0738875 MHz  
 DATA PROCESSING  
 FT size 16384  
 Total time 3 hr, 33 min

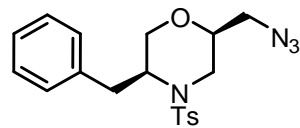

**cis-20**

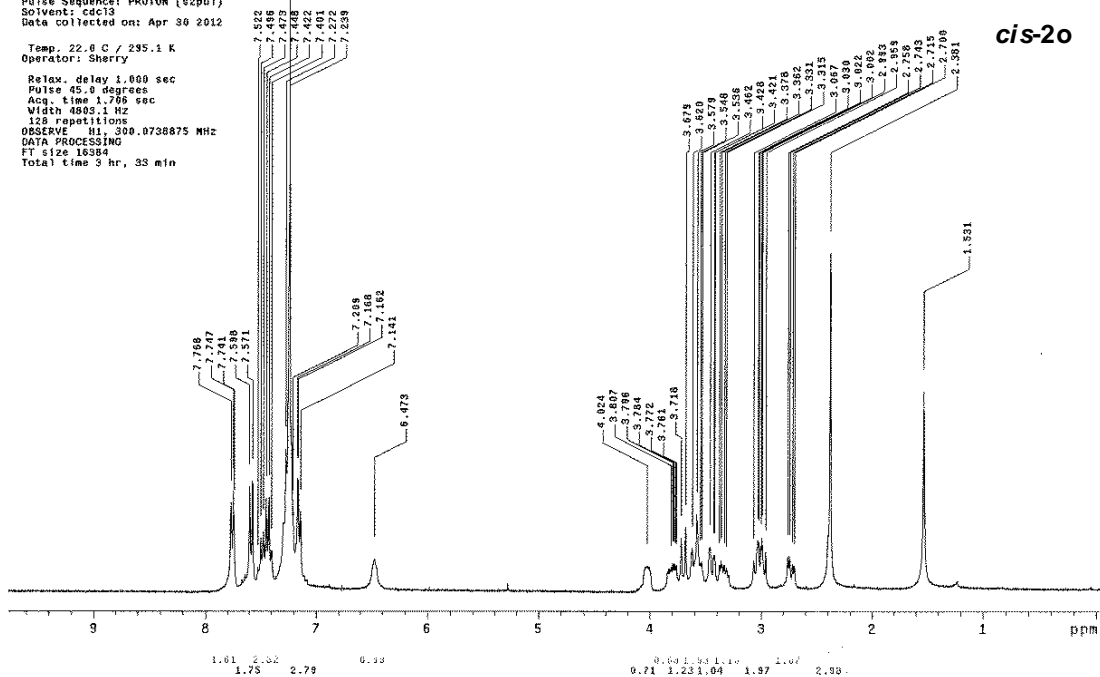

STANDARD PROTON PARAMETERS

Sample Name:  
 Data Collected on:  
 roesy.chem.buffalo.edu-mercury300  
 Archive directory:  
 Sample directory:  
 Fidfile: fs-V-78-carbon  
 Pulse Sequence: CARBON (s2pu1)  
 Solvent: cdcl3  
 Data collected on: Jan 19 2012

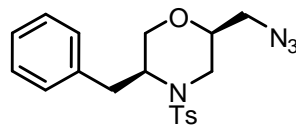

**cis-20**

Temp: 22.0 C / 295.1 K  
 Operator: Sherry  
 Relax. delay 1.000 sec  
 Pulse 45.0 degrees  
 Acq. time 0.868 sec  
 Width 18867.9 Hz  
 4464 repetitions  
 OBSERVE C13, 75.4536375 MHz  
 DECOUPLE H1, 300.0754430 MHz  
 Power 38 dB  
 continuously on  
 WALTZ-16 modulated  
 DATA PROCESSING  
 FT size 32768  
 Total time 118235 hr, 15 min

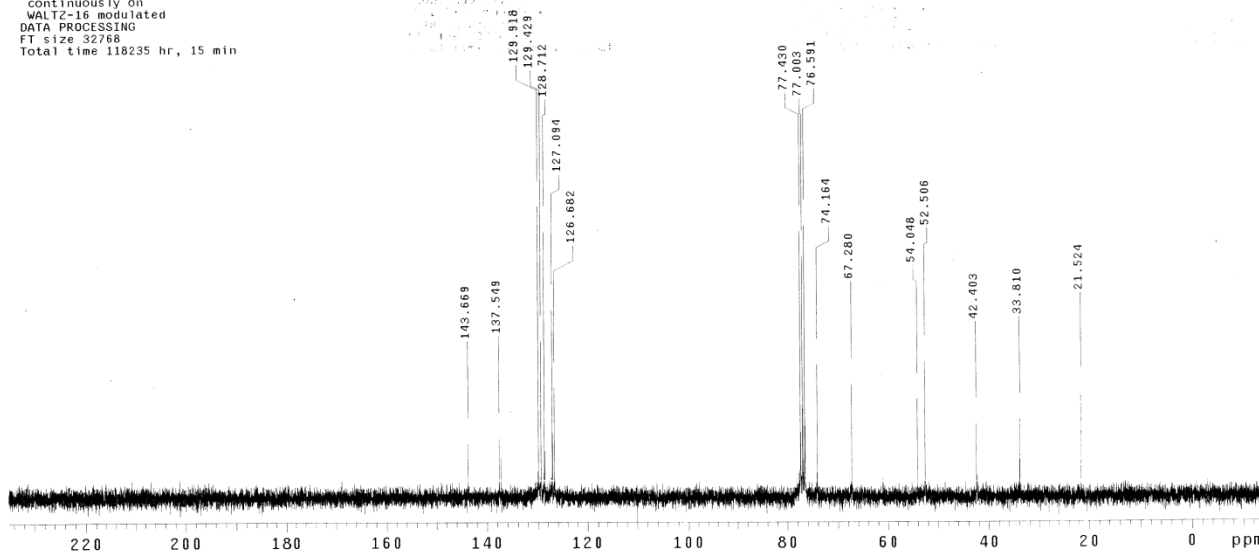



fs-V-N3-minor

Sample Name:

Date Collected on:  
chemmr400.chem.buffalo.edu-inova400

Archive directory:

Sample directory:

Fidfile: PROTON

Pulse Sequence: PROTON (s2pu1)  
Solvent: cdcl3

Data collected on: Feb 21 2012

Temp. 25.0 C / 298.1 K  
Operator: Chemler

Relax. delay 1.000 sec

Pulse 45.0 degrees

Acq. time 2.585 sec

Width 6387.7 Hz

8 Repetitions

OBSERVE H1, 399.9389026 MHz

DATA PROCESSING

FT size 32768

Total time 0 min 29 sec

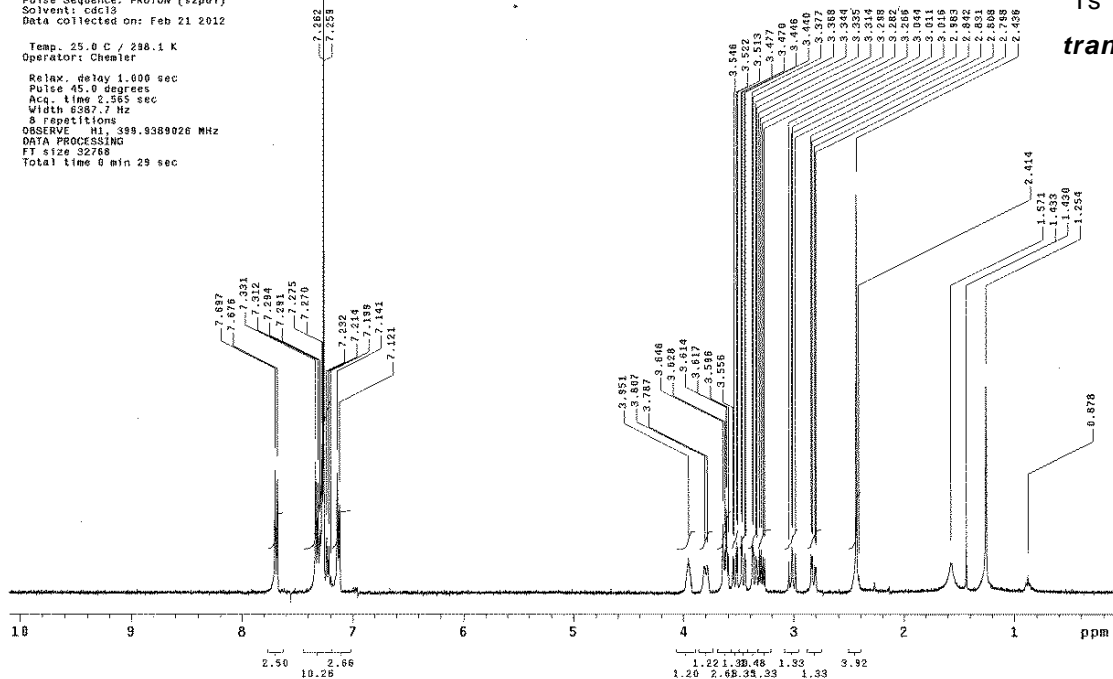

fs-V-53-carbon-min

Sample Name:

Date Collected on:  
roesy.chem.buffalo.edu-mercury300

Archive directory:

Sample directory:

Fidfile: CARBON

Pulse Sequence: CARBON (s2pu1)

Solvent: cdcl3

Data collected on: Jan 21 2012

Temp. 22.5 C / 295.6 K

Operator: Sherry

Relax. delay 1.000 sec

Pulse 45.0 degrees

Acq. time 0.868 sec

Width 18367.9 Hz

26496 repetitions

OBSERVE C13, 75.4536366 MHz

DECOUPLE H1, 300.0754430 MHz

Power 39 dB

continuously on

WALTZ-16 modulated

DATA PROCESSING

Line broadening 0.5 Hz

FT size 32768

Total time 565660 hr, 45 min

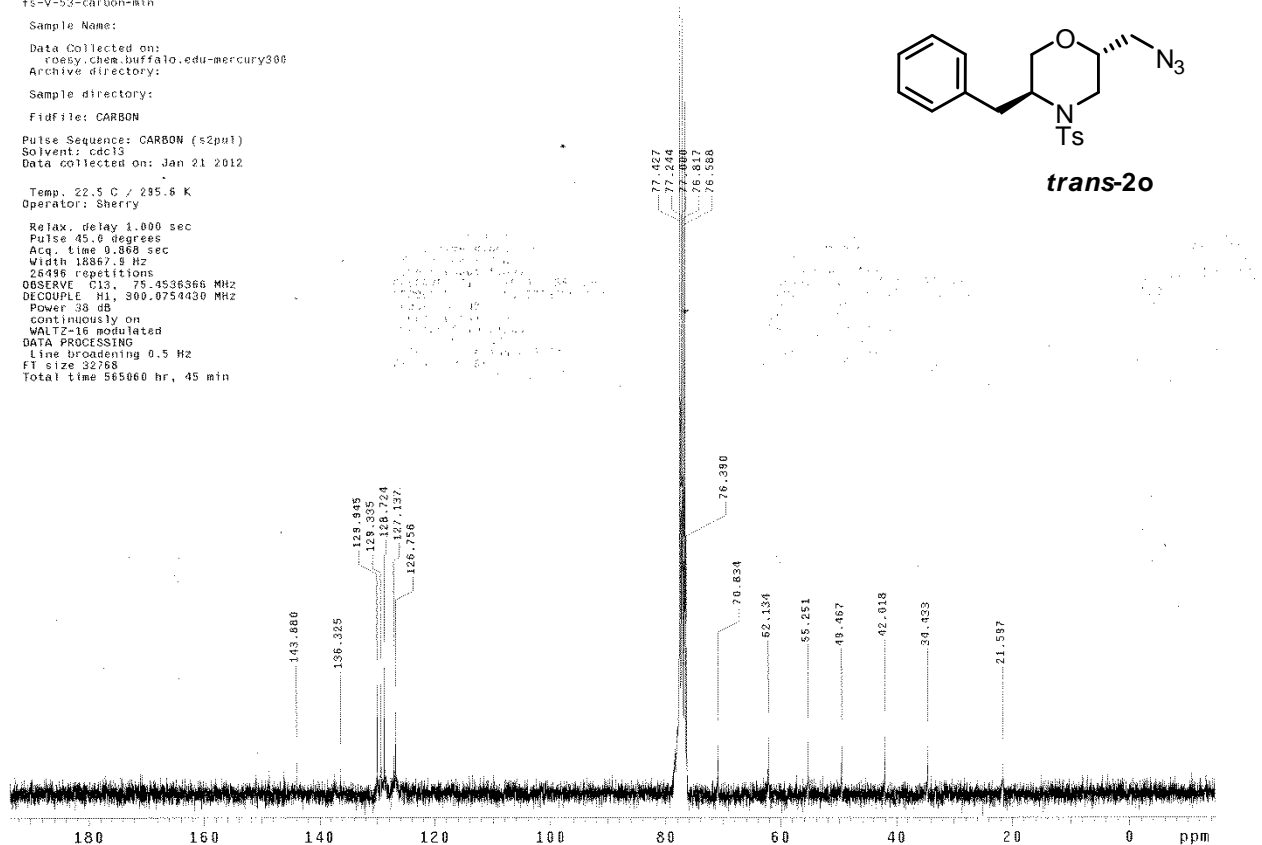

fs-IV-241-proton

Sample Name:

Data Collected on:  
roesy.chem.buffalo.edu-mercury300  
Archive directory:

Sample directory:

FidFile: PROTON

Pulse Sequence: PROTON (s2pul)  
Solvent: cdcl3  
Data collected on: Nov 18 2011

Temp. 25.0 C / 298.1 K  
Operator: Sherry

Relax. delay 1.000 sec  
Pulse 45.0 degrees  
Acq. time 1.706 sec  
Width 4803.1 Hz  
8 repetitions  
OBSERVE H1, 300.0738816 MHz  
DATA PROCESSING  
FT size 16384  
Total time 0 min 23 sec

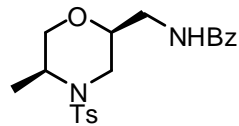

*cis*-2p

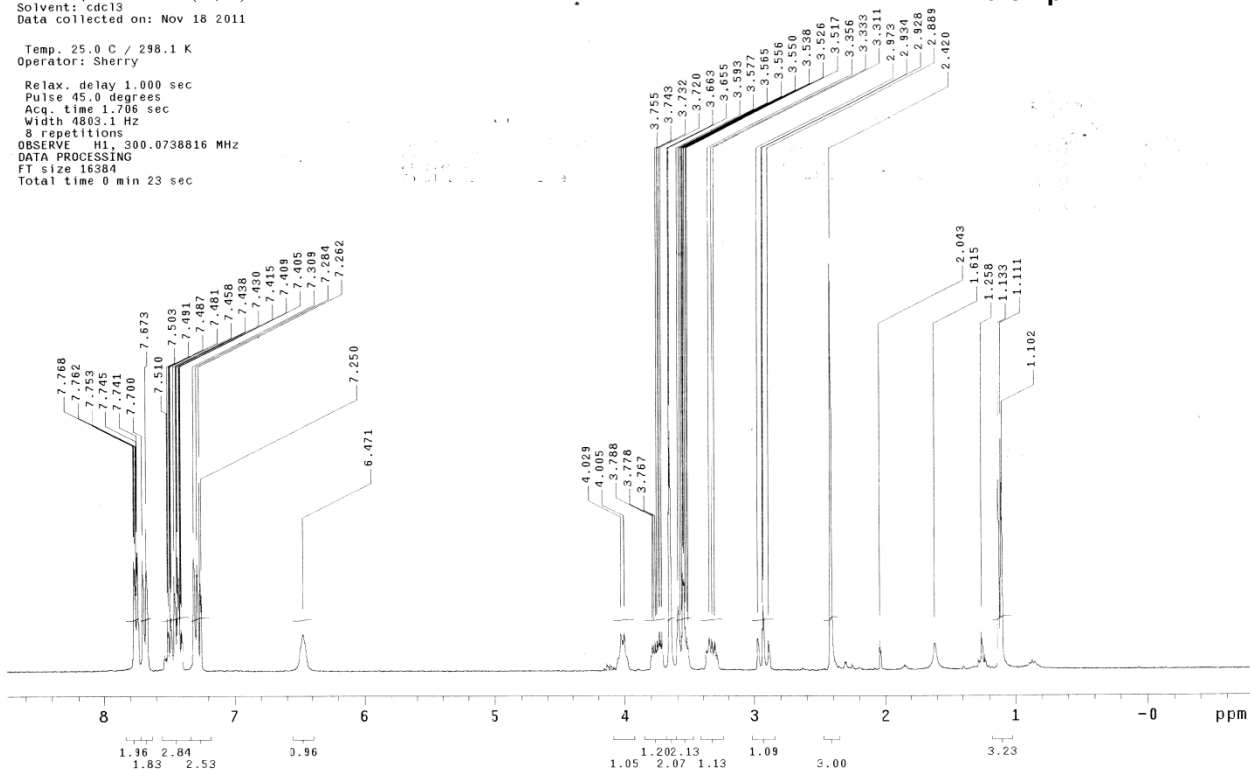

STANDARD CARBON PARAMETERS

Sample Name:

Data Collected on:  
roesy.chem.buffalo.edu-mercury300  
Archive directory:

Sample directory:

FidFile: CARBON

Pulse Sequence: CARBON (s2pul)  
Solvent: cdcl3  
Data collected on: Nov 17 2011

Temp. 99.0 C / 1272.2 K  
Operator: Sherry

Relax. delay 1.000 sec  
Pulse 45.0 degrees  
Acq. time 0.868 sec  
Width 18867.9 Hz  
24304 repetitions  
OBSERVE C13, 75.4536377 MHz  
DECOUPLE H1, 300.0754430 MHz  
Power 38 db  
continuously on  
WALTZ-16 modulated  
DATA PROCESSING  
Line broadening 0.5 Hz  
FT size 32768  
Total time 13237 hr, 8 min

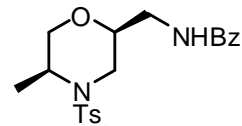

*cis*-2p

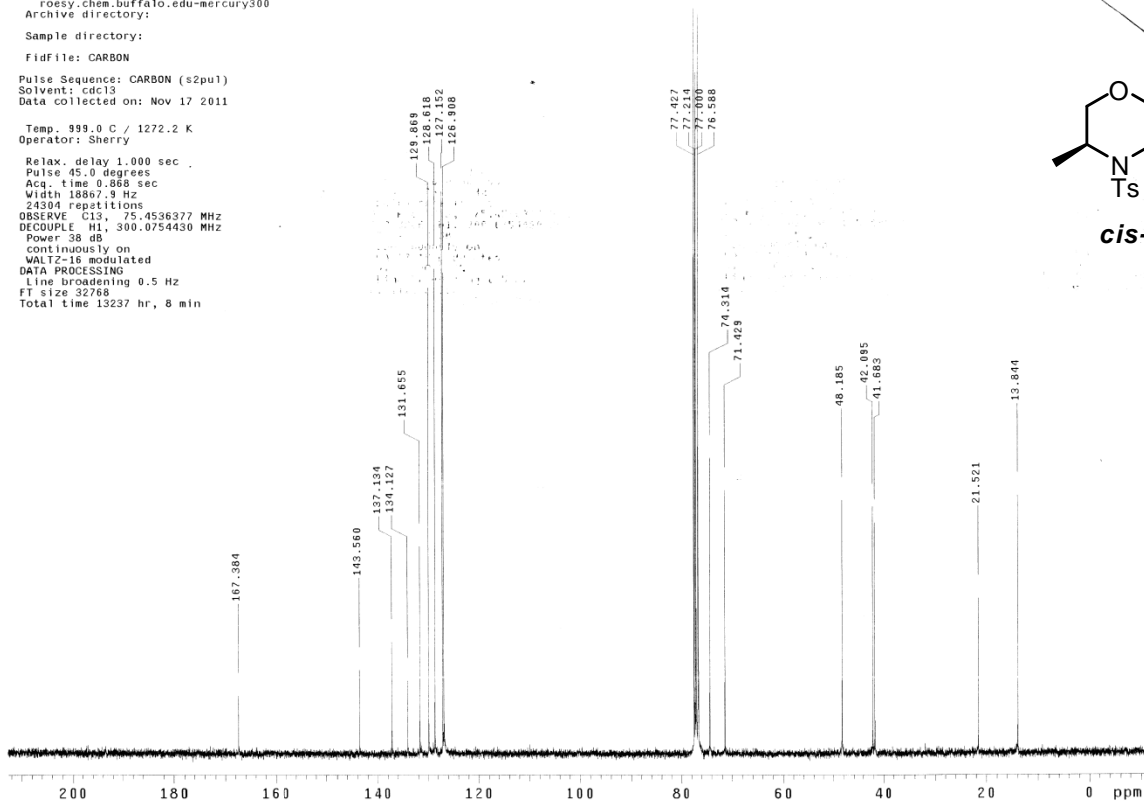

fs-V-56-proton  
 Sample Name:  
 Data Collected on:  
 chemmer400.chem.buffalo.edu-inovq400  
 Archive directory:  
 Sample directory:  
 FidFile: fs-v-56-proton

Pulse Sequence: PROTON (s2pul)  
 Solvent: cdcl3  
 Data collected on: Jan 2 2012  
 Temp. 25.0 C / 298.1 K  
 Operator: Chemler  
 Relax. delay 2.000 sec  
 Pulse 45.0 degrees  
 Acq. time 2.556 sec  
 Width 6987.7 Hz  
 8 repetitions  
 OBSERVE H1, 399.9308971  
 DATA PROCESSING  
 FT size 32768  
 Total time 0 min 29 sec

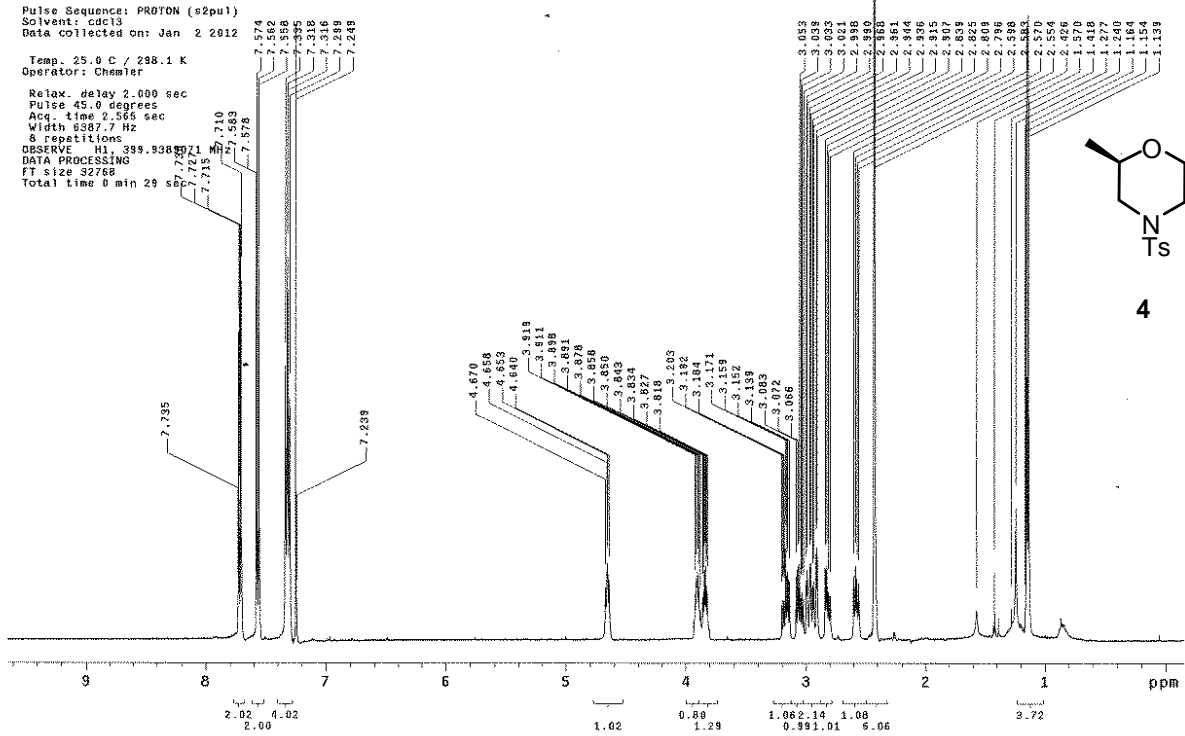

STANDARD PROTON PARAMETERS  
 Sample Name:  
 Data Collected on:  
 roesy.chem.buffalo.edu-mercury300  
 Archive directory:  
 Sample directory:  
 FidFile: fs-v-78-carbon  
 Pulse Sequence: CARBON (s2pul)  
 Solvent: cdcl3  
 Data collected on: Jan 19 2012  
 Temp. 22.0 C / 295.1 K  
 Operator: Sherry  
 Relax. delay 1.000 sec  
 Pulse 45.0 degrees  
 Acq. time 0.866 sec  
 Width 18867.8 Hz  
 4464 repetitions  
 OBSERVE C13, 75.4536375 MHz  
 DECOUPLE H1, 306.0754438 MHz  
 Power 30 dB  
 continuously on  
 WALTZ-16 modulated  
 DATA PROCESSING  
 FT size 32768  
 Total time 118235 hr, 15 min

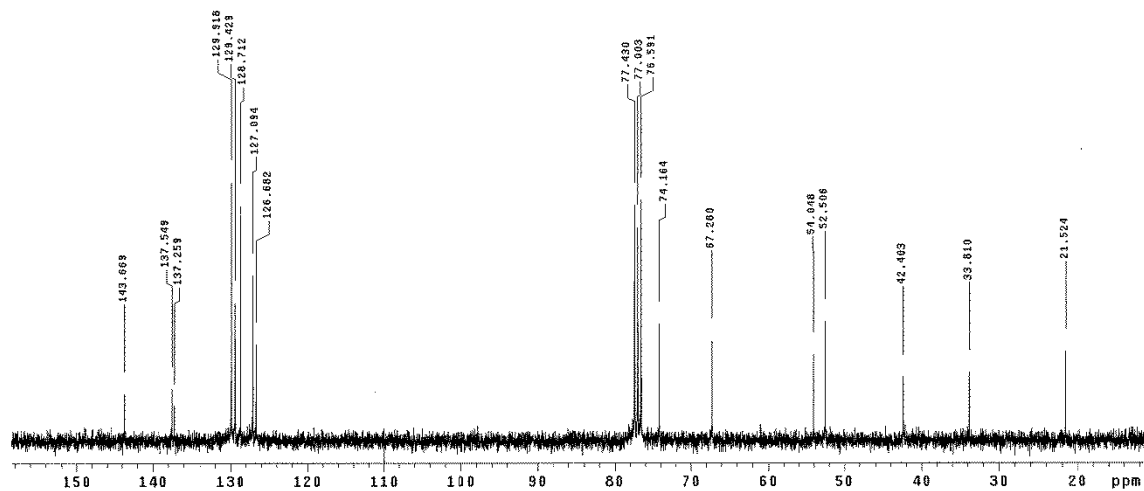

STANDARD PROTON PARAMETERS

Sample Name:  
 Data Collected on:  
 chemnmr400.chem.buffalo.edu-inova400  
 Archive directory:  
 Sample directory:  
 Fidfile: PROTON  
 Pulse Sequence: PROTON (s2pu1)  
 Solvent: c8s6  
 Data collected on: 2012  
 Temp. 25.0 C / 296.15 K  
 Operator: Chemler  
 Relax. delay 1.000 sec  
 Pulse 45.0 degrees  
 Acq. time 2.565 sec  
 Width 6387.7 Hz  
 8 repetitions  
 OBSERVE H1 399.939431 MHz  
 DATA PROCESSING  
 FT size 32768  
 Total time 0 min 29 sec

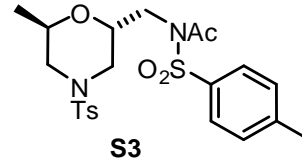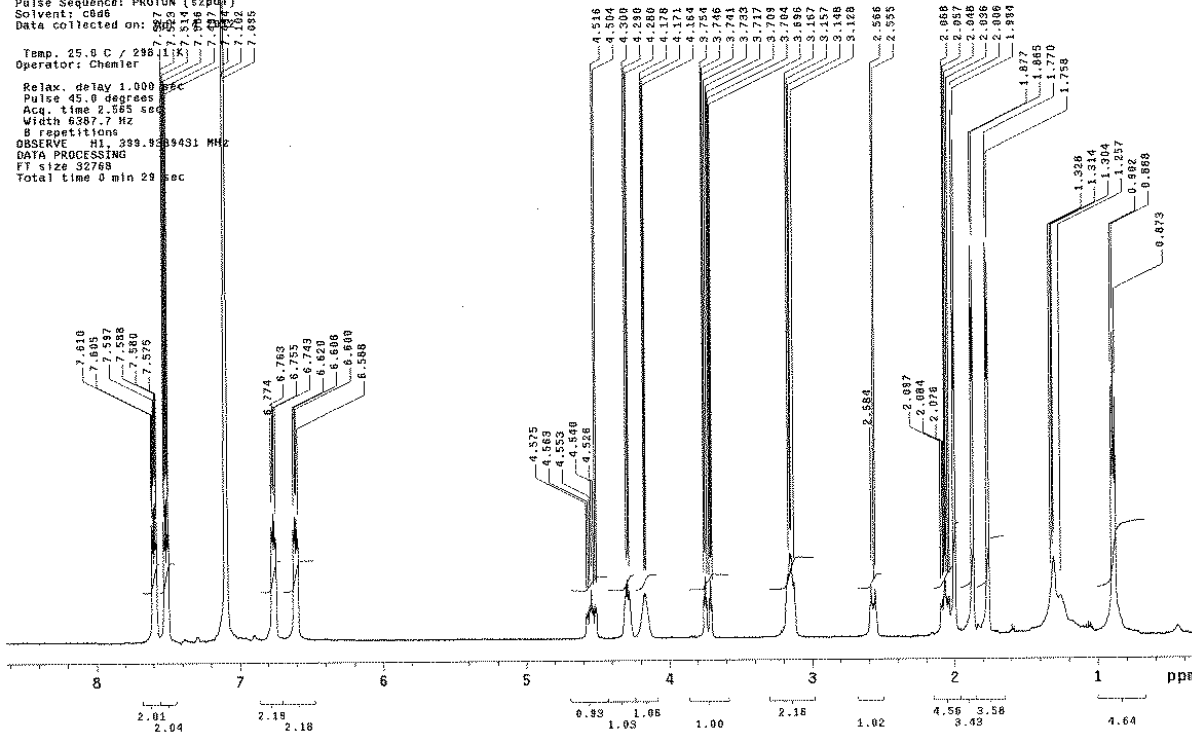

13C-V-136-carbon

Sample Name:  
 Data Collected on:  
 roesy.chem.buffalo.edu-mercury300  
 Archive directory:  
 Sample directory:  
 Fidfile: CARBON  
 Pulse Sequence: CARBON (s2pu1)  
 Solvent: cdcl3  
 Data collected on: Apr 1 2012  
 Temp. 21.0 C / 294.1 K  
 Operator: Sherry  
 Relax. delay 1.000 sec  
 Pulse 45.0 degrees  
 Acq. time 0.368 sec  
 Width 18667.9 Hz  
 32912 Repetitions  
 OBSERVE C13 TS 4536309 MHz  
 DECOUPLE H1 399.0754430 MHz  
 Power 38 dB  
 continuously on  
 WALTZ-16 modulated  
 DATA PROCESSING  
 Line broadening 0.5 Hz  
 FT size 32768  
 Total time 281914 hr, 59 min

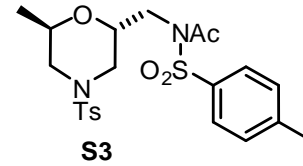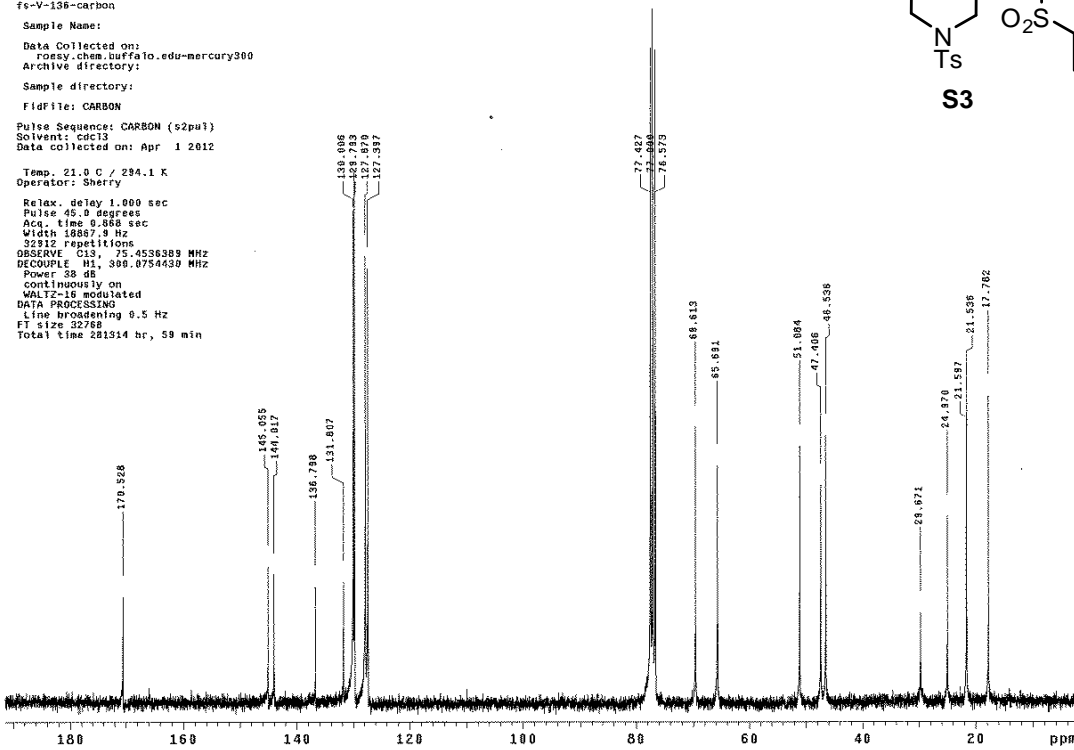

STANDARD PROTON PARAMETERS  
 Selective band center: 0.80 (ppm); width: 50.0 (Hz)

Sample Name:  
 Data Collected on:  
 Chemnmr400.chem.buffalo.edu-inova400  
 Archive directory:  
 Sample directory:  
 Fidfile: NOESY1D

Pulse Sequence: NOESY1D  
 Solvent: CDCl3  
 Data collected on: Apr 3 2012

Temp. 25.0 C / 298.1 K  
 Operator: Chemler

Relax. delay 1.000 sec  
 Pulse 90.0 degrees  
 Acq. time 2.047 sec  
 Width 2000.8 Hz  
 3600 repetitions  
 OBSERVE H1, 399.9388431 MHz  
 DATA PROCESSING  
 FT size 8192  
 Total time 3 hr, 44 min

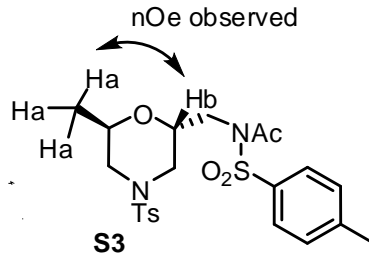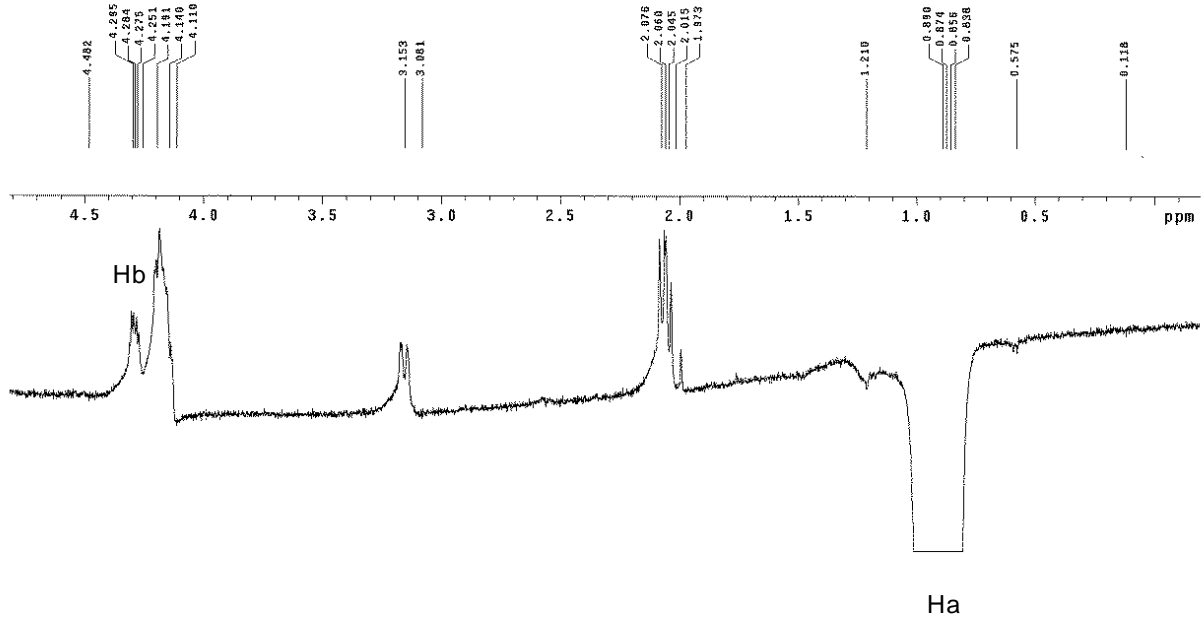

fs-V-168-proton

Sample Name:  
 Data Collected on:  
 roesy.chem.buffalo.edu-mercury300  
 Archive directory:  
 Sample directory:  
 Fidfile: PROTON

Pulse Sequence: PROTON (s2pu1)  
 Solvent: cdcl3  
 Data collected on: Jun 8 2012

Temp. 25.0 C / 298.1 K  
 Operator: Sherry

Relax. delay 1.000 sec  
 Pulse 45.0 degrees  
 Acq. time 1.785 sec  
 Width 4803.1 Hz  
 8 repetitions  
 OBSERVE H1 300.0738611 MHz  
 DATA PROCESSING  
 FT size 16384  
 Total time 0 min 23 sec

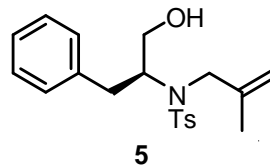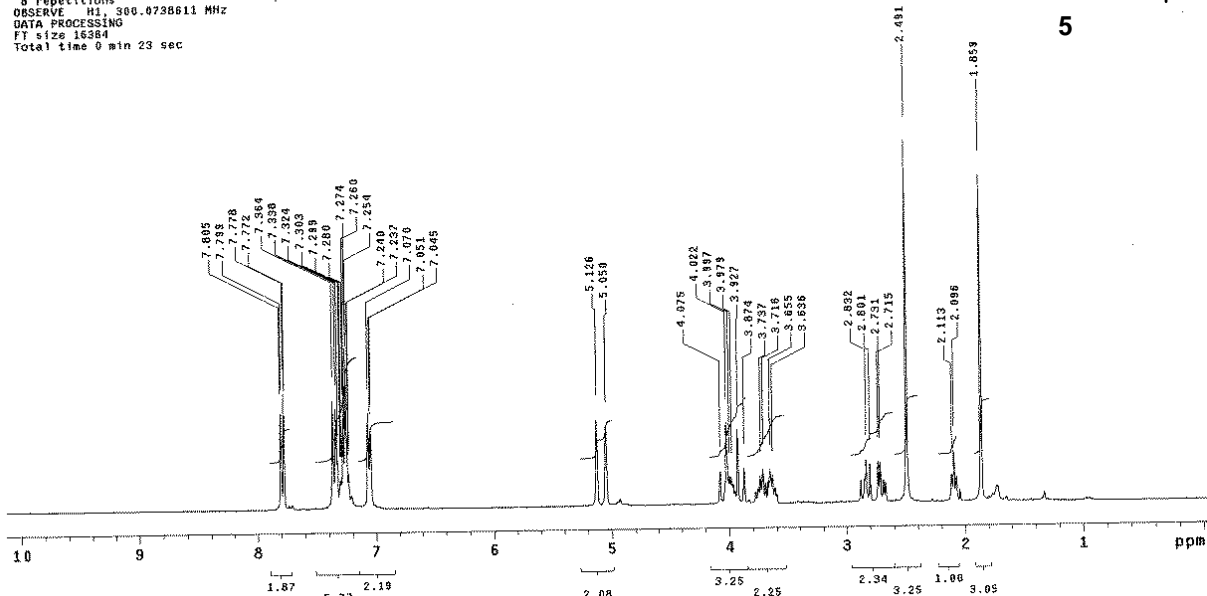

fs-V-168-carbon

Sample Name:  
 Data Collected on:  
 roesy.chem.buffalo.edu-mercury300  
 Archive directory:  
 Sample directory:  
 Fidfile: CARBON

Pulse Sequence: CARBON (s2pu1)  
 Solvent: cdcl3  
 Data collected on: Jun 8 2012

Temp. 22.7 C / 295.9 K  
 Operator: Sherry

Relax. delay 1.000 sec  
 Pulse 45.0 degrees  
 Acq. time 0.868 sec  
 Width 18867.9 Hz  
 736 repetitions  
 OBSERVE C13 75.4536375 MHz  
 DECOUPLE H1 300.0754430 MHz  
 Power 38 dB  
 continuously on  
 WALTZ-16 modulated  
 DATA PROCESSING  
 Line broadening 0.5 Hz  
 FT size 32768  
 Total time 11517 hr, 5 min

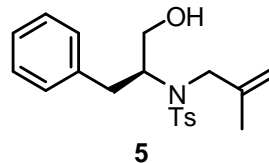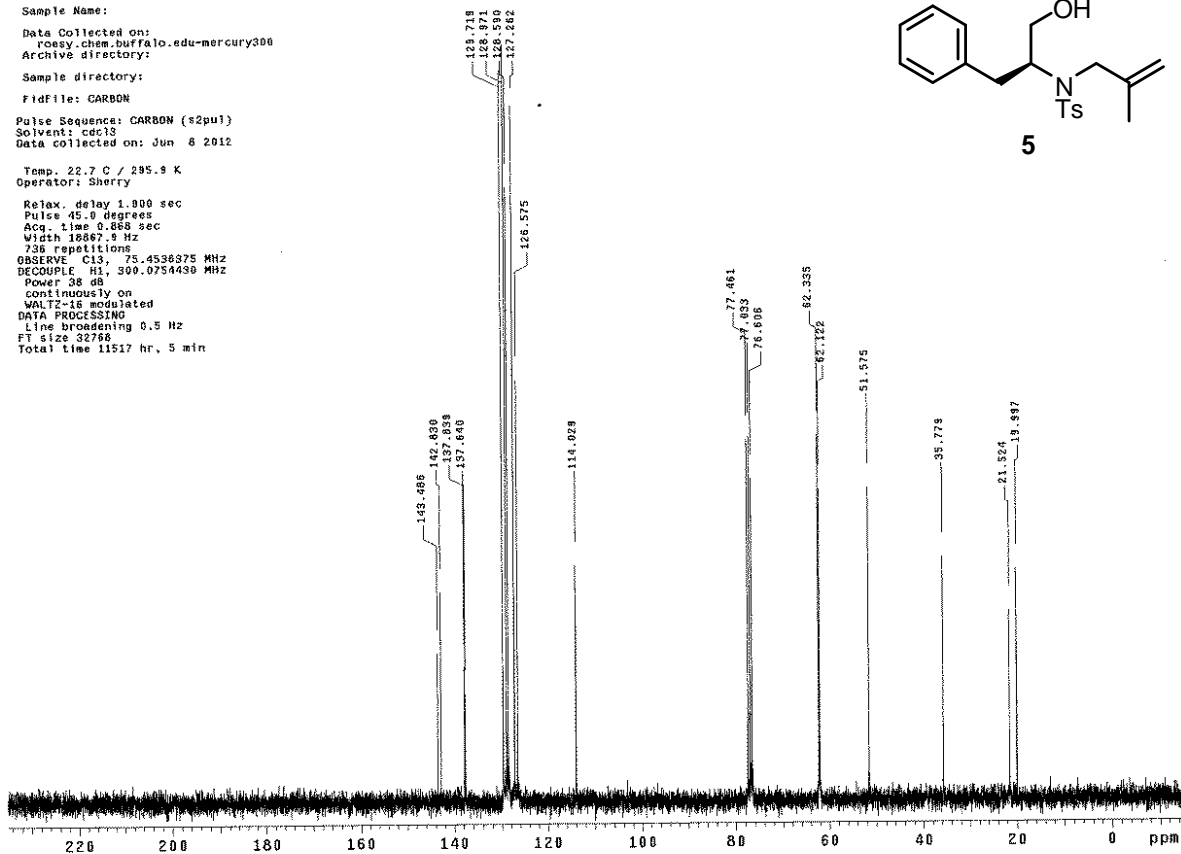

fs-V-70-f1-proton

Sample Name:  
DC-99pure  
Data Collected on:  
chemm500.chem.buffalo.edu-inova500  
Archive directory:  
Sample directory:  
Fidfile: fs-V-70-f1-proton  
Pulse Sequence: PROTON (s2pul)  
Solvent: cdcl3  
Data collected on: Jun 12 2012

Temp. 25.0 C / 298.1 K  
Operator: Chemler

Relax. delay 1.000 sec  
Pulse 45.0 degrees  
Acq. time 2.048 sec  
Width 8000.0 Hz  
16 repetitions  
OBSERVE H1, 499.8983908 MHz  
DATA PROCESSING  
FT size 32768  
Total time 0 min 49 sec

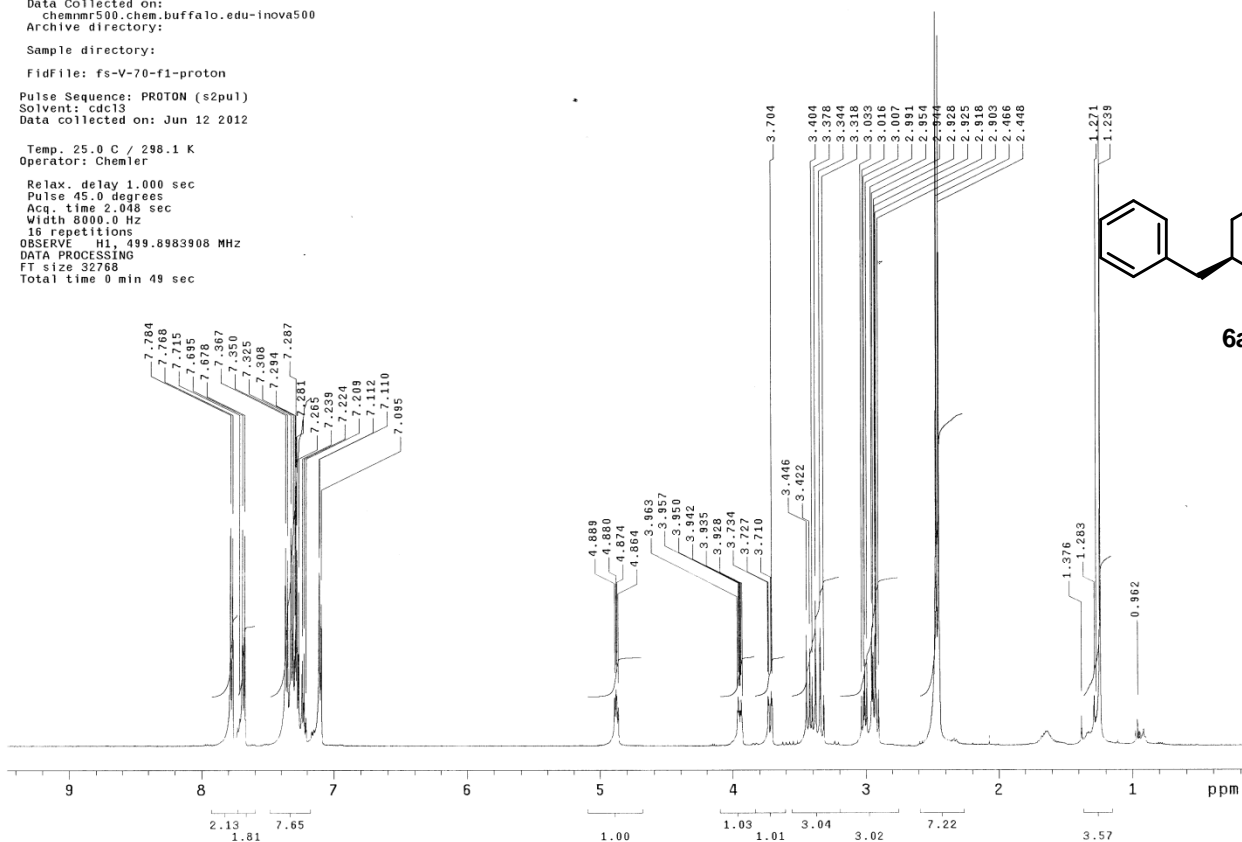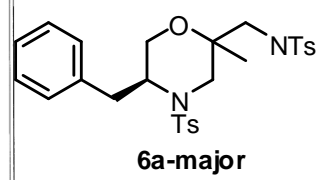

STANDARD CARBON PARAMETERS

Sample Name:  
Data Collected on:  
roesy.chem.buffalo.edu-mercury300  
Archive directory:  
Sample directory:  
Fidfile: CARBON  
Pulse Sequence: CARBON (e2pu1)  
Solvent: cdcl3  
Data collected on: Jun 11 2012  
Temp. 25.0 C / 298.1 K  
Operator: Sherry  
Relax. delay 1.000 sec  
Pulse 45.0 degrees  
Acq. time 0.008 sec  
Width 18867.0 Hz  
22464 repetitions  
OBSERVE C13, 75.4536388 MHz  
DECUPLE H1, 300.6754430 MHz  
Power 38 dB  
Continuously on  
WALTZ-16 modulated  
DATA PROCESSING  
Line broadening 0.5 Hz  
FT size 32768  
Total time 197 hr, 25 min

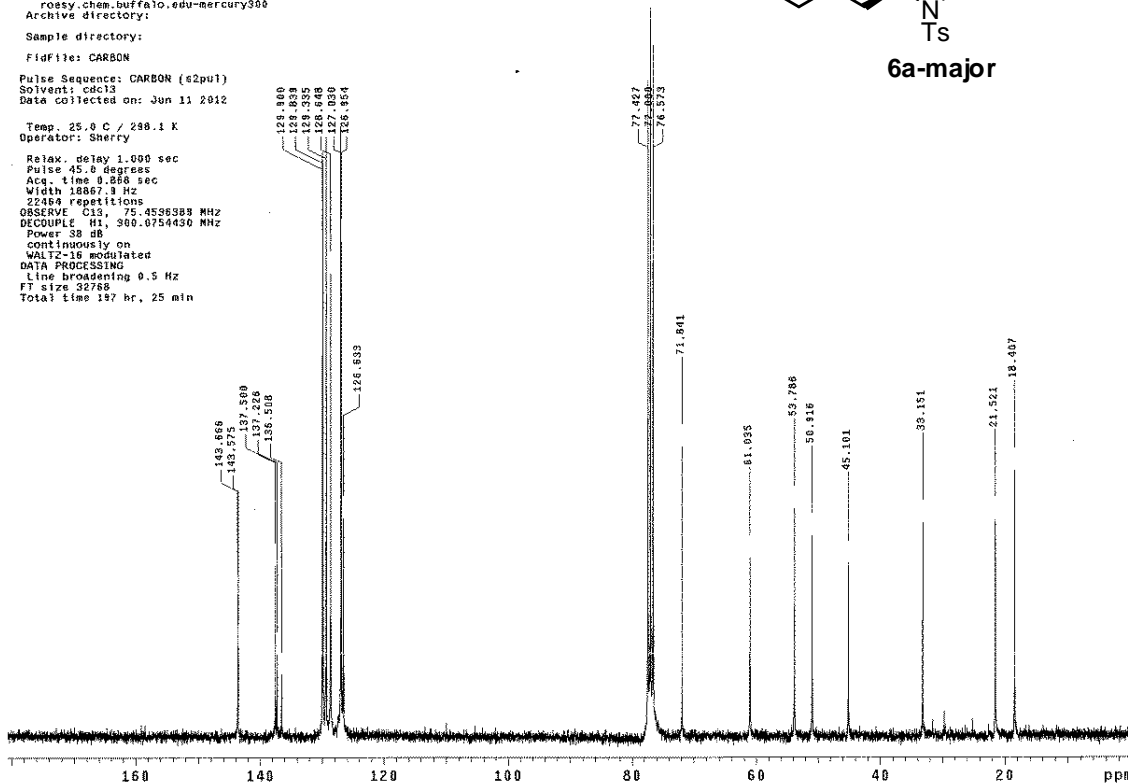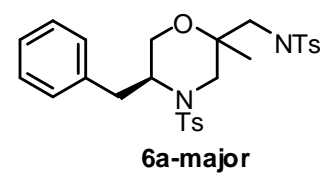

fs-V-70-2proton  
 Sample Name:  
 Data Collected on:  
 chemnar400.chem.buffalo.edu-1mova400  
 Archive directory:  
 Sample directory:  
 Fidfile: PROTON  
 Pulse Sequence: PROTON (s2pul)  
 Solvent: cdc13  
 Data collected on: Jun 12 2012  
 Operator: Chemler  
 Relax. delay 1.800 sec  
 Pulse 45.0 degrees  
 Acq. time 7.585 sec  
 Width 8387.7 Hz  
 8 repetitions  
 OBSERVE H1 399.9389019 MHz  
 DATA PROCESSING  
 FT size 32768  
 Total time 0 min 23 sec

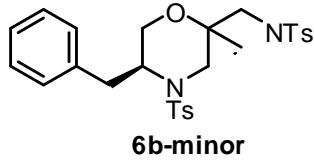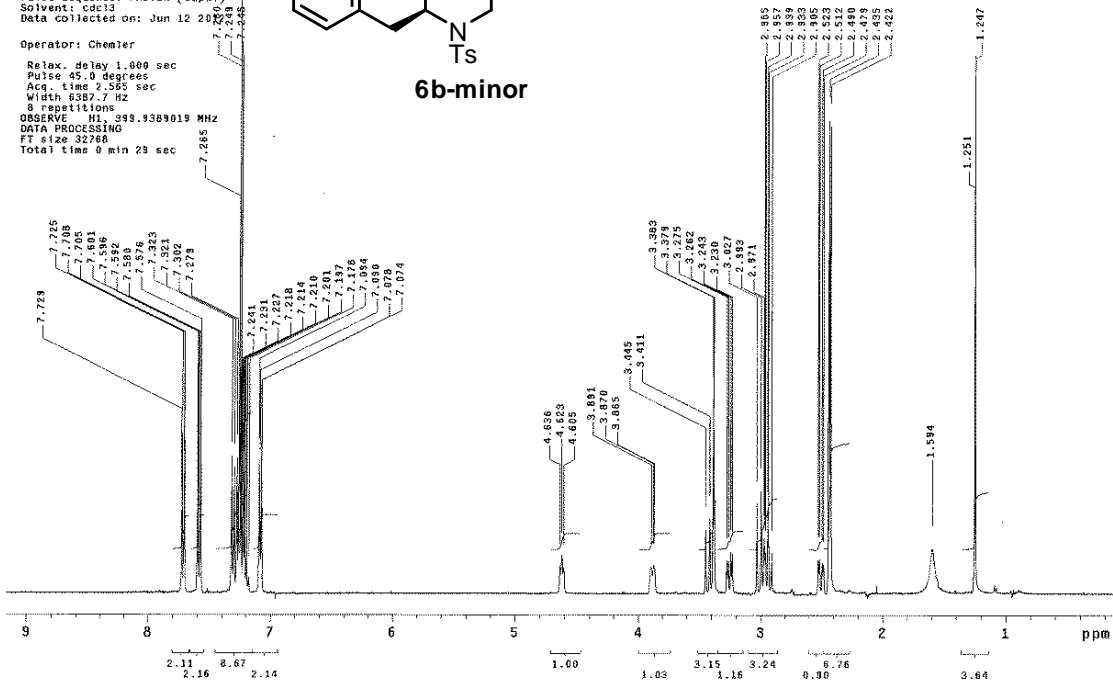

fs-V-170-f2-carbon  
 Sample Name:  
 Data Collected on:  
 rossy.chem.buffalo.edu-mercury300  
 Archive directory:  
 Sample directory:  
 Fidfile: CARBON  
 Pulse Sequence: CARBON (s2pul)  
 Solvent: cdc13  
 Data collected on: Jun 12 2012  
 Temp. 25.0 C / 298.1 K  
 Operator: Sherry  
 Relax. delay 1.000 sec  
 Pulse 45.0 degrees  
 Acq. time 0.868 sec  
 Width 18067.5 Hz  
 21600 repetitions  
 OBSERVE C13 75.4536375 MHz  
 DECOUPLE H1 399.0754430 MHz  
 Power 38 dB  
 CONTINUOUS on  
 WALTZ-16 modulated  
 DATA PROCESSING  
 Line broadening 0.5 Hz  
 FT size 32768  
 Total time 264 hr, 40 min

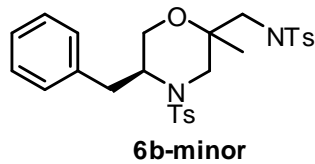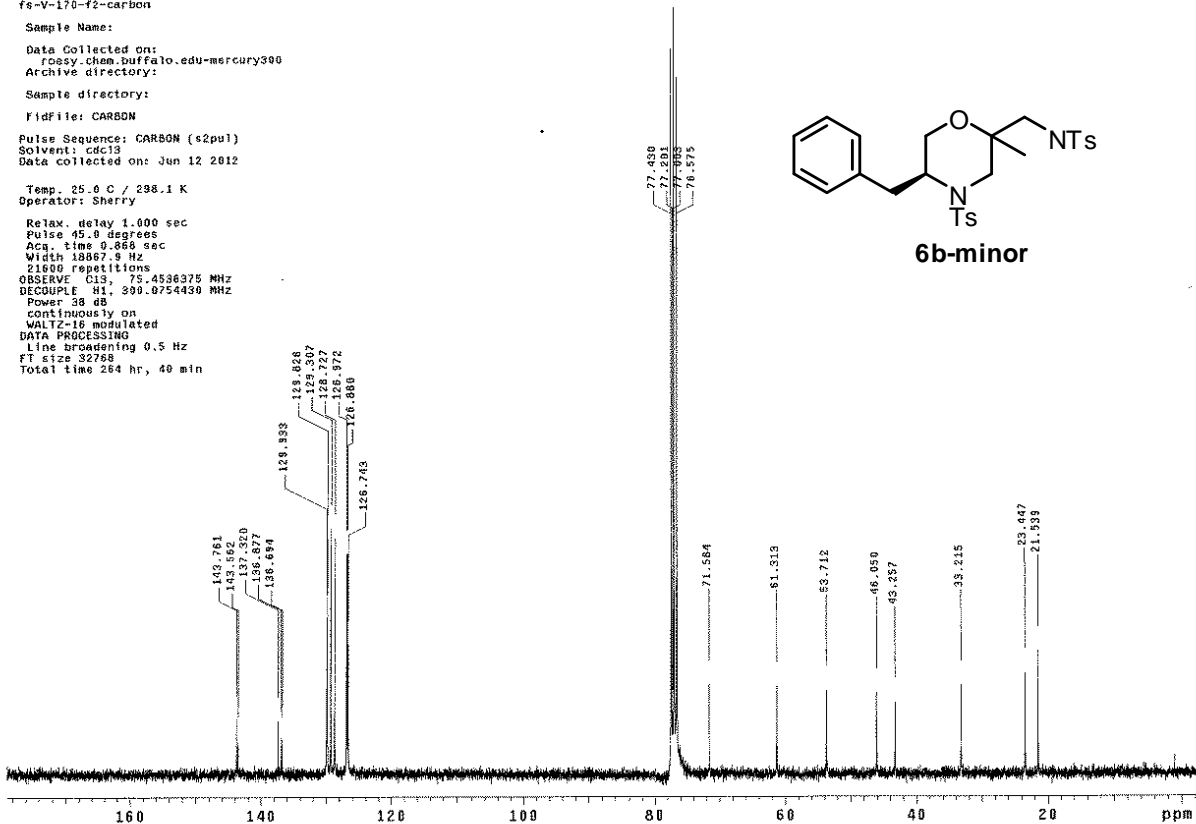





fs-ligand-cap-OH-carbon

Sample Name:

Data Collected on:

roesy.chem.buffalo.edu-mercury300

Archive directory:

Sample directory:

Fidfile: PROTON

Pulse Sequence: PROTON (s2pul)

Solvent: cdcl3

Data collected on: Mar 8 2012

Temp. 25.0 C / 298.1 K

Operator: Sherry

Relax. delay 1.000 sec

Pulse 45.0 degrees

Acq. time 1.705 sec

Width 4893.1 Hz

150 repetitions

OBSERVE H1, 300.0738816 MHz

DATA PROCESSING

FT size 18384

Total time 770541 hr, 56 min

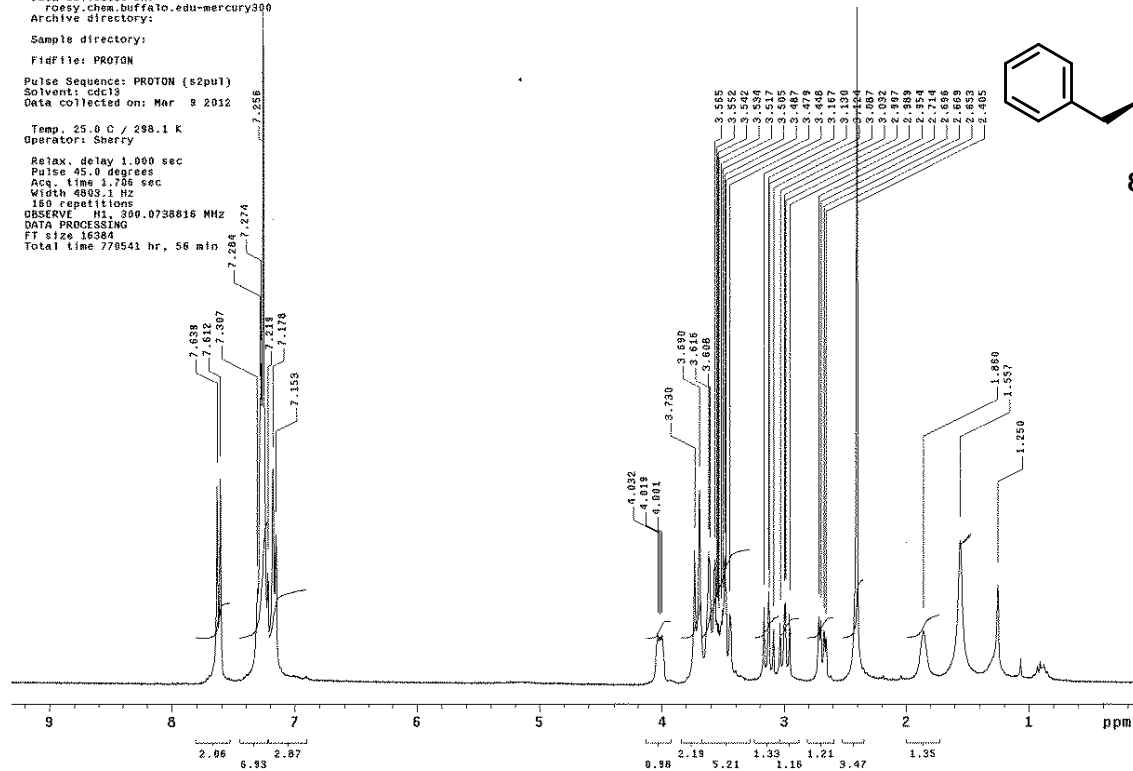

fs-ligand-cap-OH-proton

Sample Name:

Data Collected on:

roesy.chem.buffalo.edu-mercury300

Archive directory:

Sample directory:

Fidfile: CARBON

Pulse Sequence: CARBON (s2pul)

Solvent: cdcl3

Data collected on: Mar 8 2012

Temp. 25.0 C / 298.1 K

Operator: Sherry

Relax. delay 5.000 sec

Pulse 45.0 degrees

Acq. time 0.865 sec

Width 18867.9 Hz

726 repetitions

OBSERVE C13, 75.4536375 MHz

DECOUPLE H1, 300.0754430 MHz

Power 38 dB

continuously on

WALTZ-16 modulated

DATA PROCESSING

Line broadening 0.5 Hz

FT size 32768

Total time 727405 hr

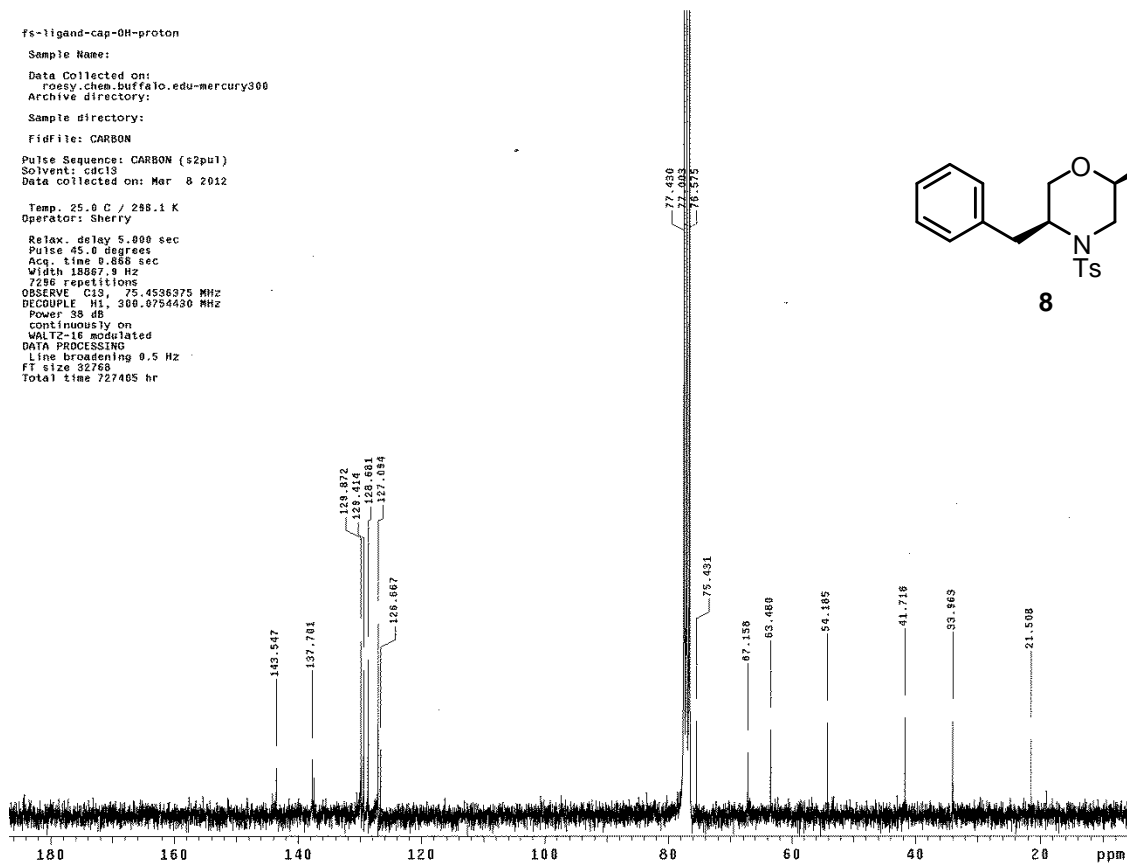

fs-V-99-proton  
 Sample Name:  
 Data Collected on:  
 roesy.chem.buffalo.edu-mercury300  
 Archive directory:  
 Sample directory:  
 Fidfile: PROTON  
 Pulse Sequence: PROTON (s2pu1)  
 Solvent: cdcl3  
 Data collected on: Mar 11 2012  
 Temp. 25.0 C / 298.1 K  
 Operator: Sherry  
 Relax. delay 1.000 sec  
 Pulse 45.0 degrees  
 Acq. time 1.796 sec  
 Width 4603.1 Hz  
 8 repetitions  
 OBSERVE H1, 300.0738816 MHz  
 DATA PROCESSING  
 FT size 16384  
 Total time 0 min 23 sec

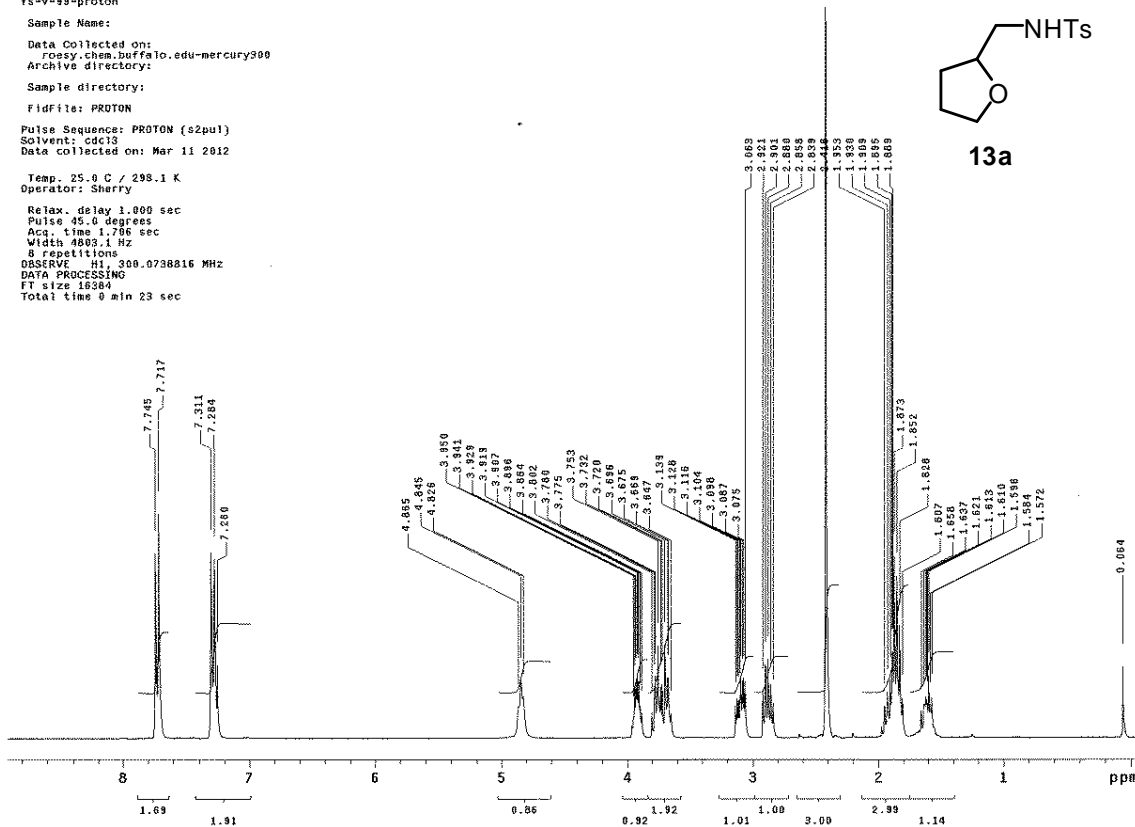

fs-V-99-carbon  
 Sample Name:  
 Data Collected on:  
 roesy.chem.buffalo.edu-mercury300  
 Archive directory:  
 Sample directory:  
 Fidfile: CARBON  
 Pulse Sequence: CARBON (s2pu1)  
 Solvent: cdcl3  
 Data collected on: Mar 11 2012  
 Temp. 22.8 C / 295.9 K  
 Operator: Sherry  
 Relax. delay 1.000 sec  
 Pulse 45.0 degrees  
 Acq. time 0.868 sec  
 Width 18697.3 Hz  
 4208 repetitions  
 OBSERVE C13, 75.4536375 MHz  
 DECOUPLE H1, 300.0754450 MHz  
 Power 38 dB  
 continuously on  
 WALTZ-16 modulated  
 DATA PROCESSING  
 Line broadening 0.5 Hz  
 FT size 32768  
 Total time 565060 hr, 45 min

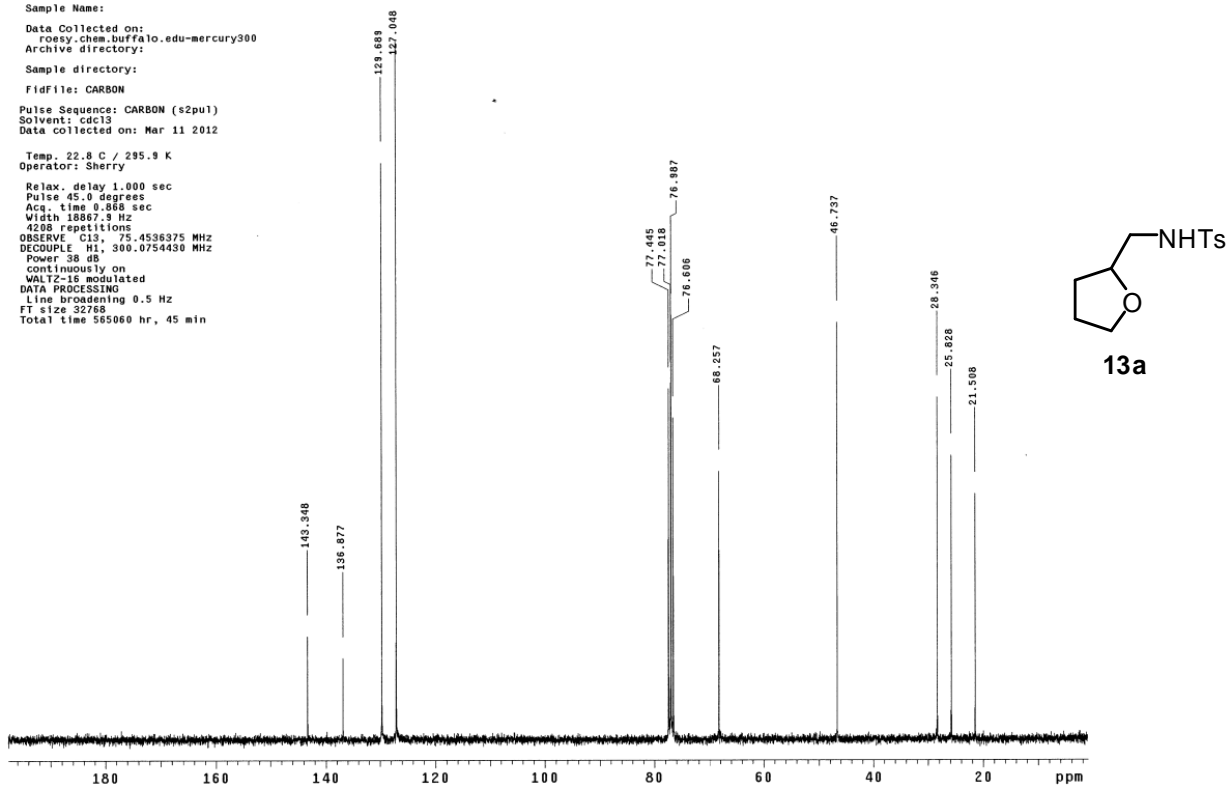

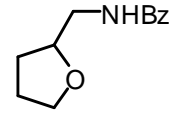

13b

fs-V-110-proton  
 Sample Name:  
 Data Collected on:  
 roesy.chem.buffalo.edu-mercury300  
 Archive directory:  
 Sample directory:  
 Fidfile: PROTON  
 Pulse Sequence: PROTON (s2pu1)  
 Solvent: cdcl3  
 Data collected on: Mar 2 2012  
 Temp. 25.0 C / 298.1 K  
 Operator: Sherry  
 Relax. delay 1.000 sec  
 Pulse 45.0 degrees  
 Acq. time 1.706 sec  
 Width 6603.1 Hz  
 56 repetitions  
 OBSERVE H1, 300.0738816 MHz  
 DATA PROCESSING  
 FT size 18384  
 Total time 770541 hr, 56 min

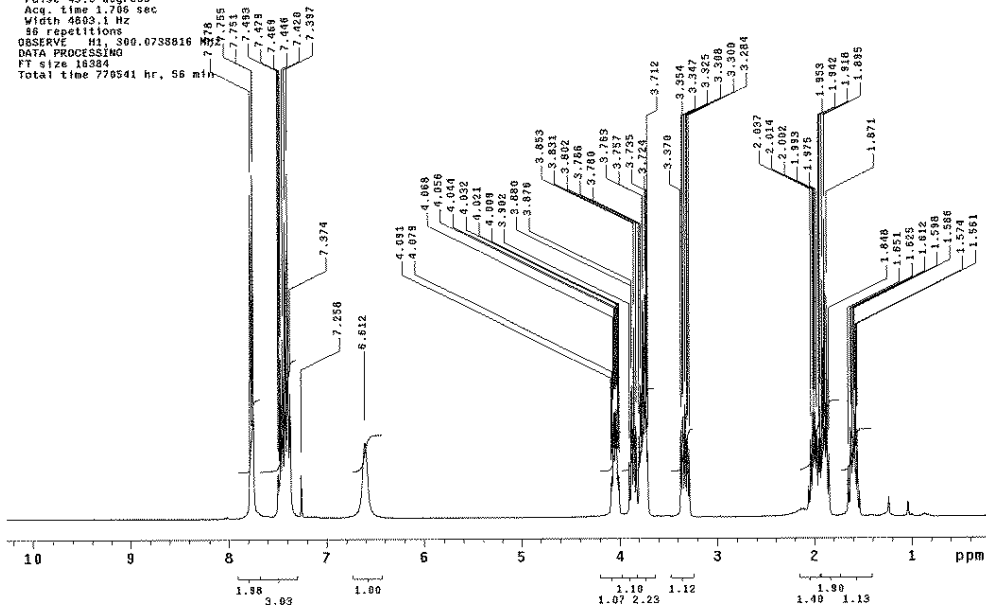

fs-V-110-carbon  
 Sample Name:  
 Data Collected on:  
 roesy.chem.buffalo.edu-mercury300  
 Archive directory:  
 Sample directory:  
 Fidfile: fs-V-110-carbon  
 Pulse Sequence: CARBON (s2pu1)  
 Solvent: cdcl3  
 Data collected on: Mar 2 2012  
 Temp. 25.0 C / 298.1 K  
 Operator: Sherry  
 Relax. delay 1.000 sec  
 Pulse 45.0 degrees  
 Acq. time 0.888 sec  
 Width 18867.9 Hz  
 224 repetitions  
 OBSERVE C13, 75.4536423 MHz  
 DECOUPLE H1, 300.0754430 MHz  
 Power 30 dB  
 continuously on  
 WALTZ-16 modulated  
 DATA PROCESSING  
 Line broadening 0.5 Hz  
 FT size 32768  
 Total time 263118 hr, 9 min

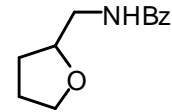

13b

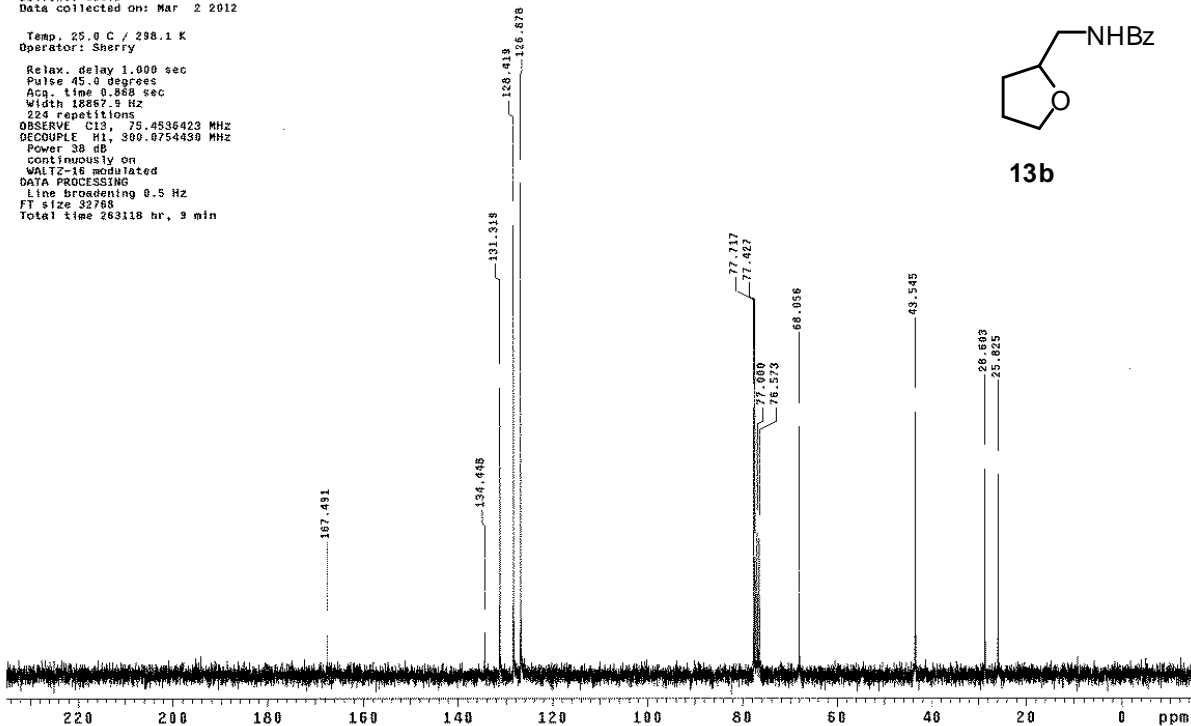

fs-V-136-proton

Sample Name:

Data Collected on:  
chemmr400.chem.buffalo.edu-inova400

Archive directory:

Sample directory:

Fidfile: PROTON

Pulse Sequence: PROTON (s2pu1)

Solvent: cdd6

Data collected on: Apr 5 2012

Temp. 25.0 C / 298.1 K

Operator: Chemlar

Relax. delay 2.000 sec

Pulse 45.0 degrees

Acq. time 2.555 sec

Width 6387.7 Hz

8 repetitions

OBSERVE H1, 399.9389328 MHz

DATA PROCESSING

FT size 32768

FT resolution 0.082 min 29 6879

FT scan rate 7.40250 min 7.0

FT S/N 1.384

FT F2 1.3333

FT F1 1.283

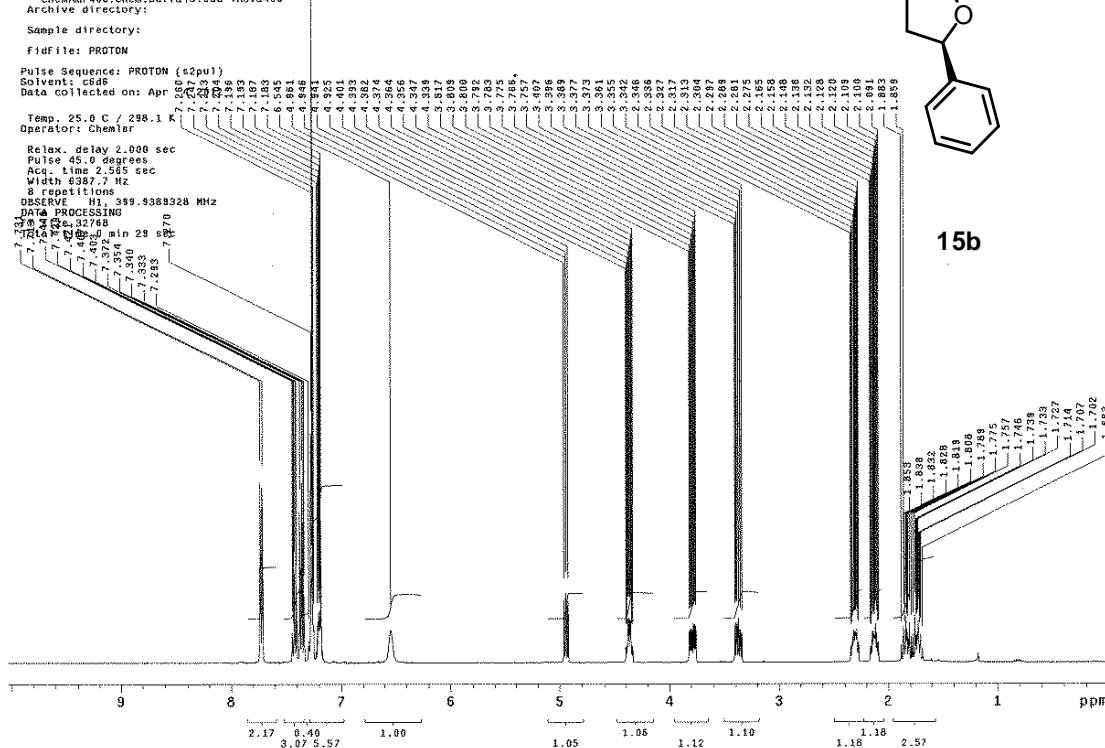

fs-V-147carbon

Sample Name:

Data Collected on:  
roesy.chem.buffalo.edu-mercury300

Archive directory:

Sample directory:

Fidfile: CARBON

Pulse Sequence: CARBON (s2pu1)

Solvent: cdc13

Data collected on: Apr 5 2012

Temp. 22.0 C / 295.1 K

Operator: Sherry

Relax. delay 1.000 sec

Pulse 45.0 degrees

Acq. time 0.868 sec

Width 18867.9 Hz

2480 repetitions

OBSERVE C13, 75.4596375 MHz

DECOUPLE H1, 300.0754430 MHz

Power 38 dB

continuously on

WALTZ-16 modulated

DATA PROCESSING

Line broadening 0.5 Hz

FT size 32768

Total time 25628 hr, 7 min

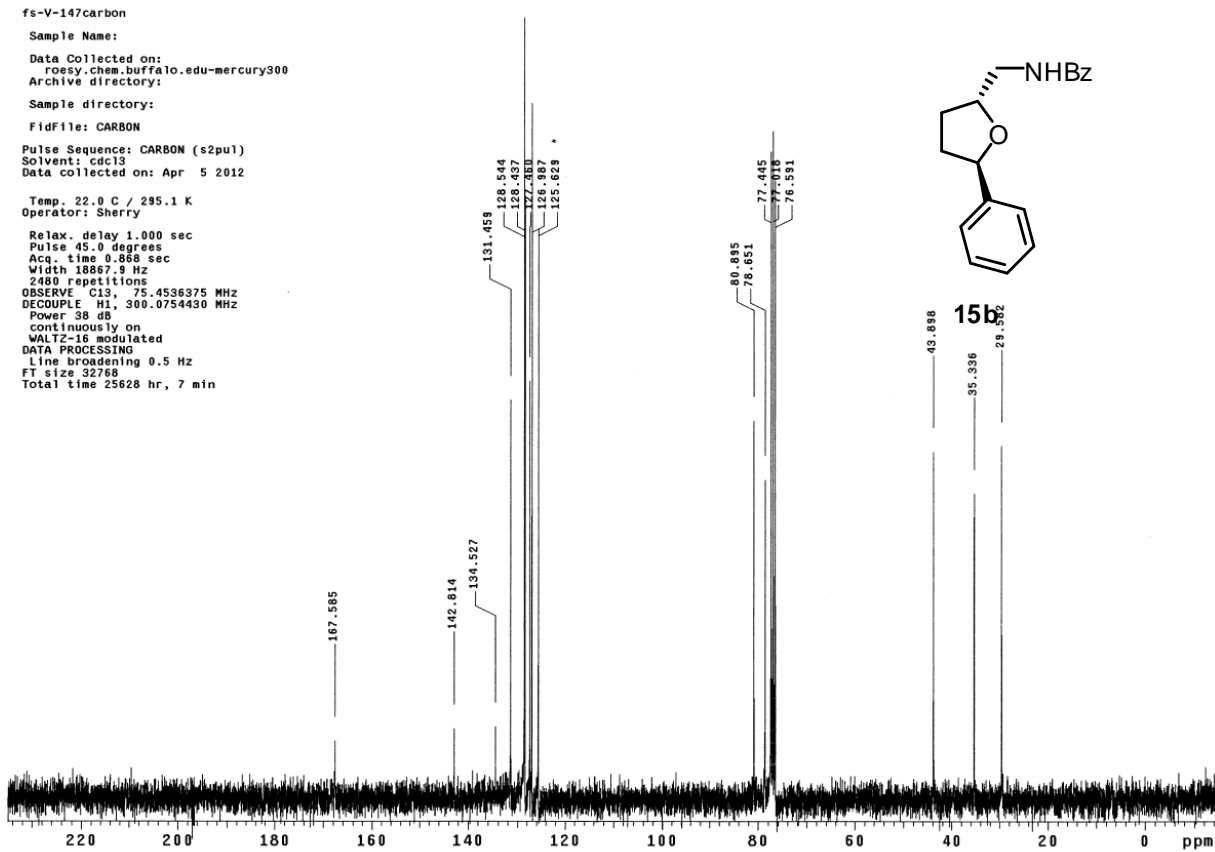

fs-V-147NDS-1

Sample Name:

Data Collected on:  
chemarr408.chem.buffalo.edu~nova408  
Archive directory:

Sample directory:

FidFile: NOESY10

Pulse Sequence: NOESY10

Solvent: c6d6

Data collected on: Apr 4 2012

Temp: 25.0 C / 298.1 K

Operator: Chemist

Relax. delay: 1.000 sec

Pulse: 90.0 degrees

Acq. time: 3.032 sec

Width: 2648.7 Hz

6400 repetitions

DESIKE: 91.3349369431 MHz

DATA PROCESSING

FT size: 16384

Total time: 6 hr, 21 min

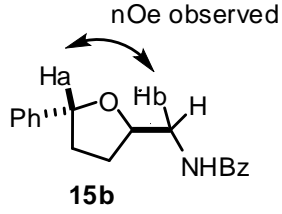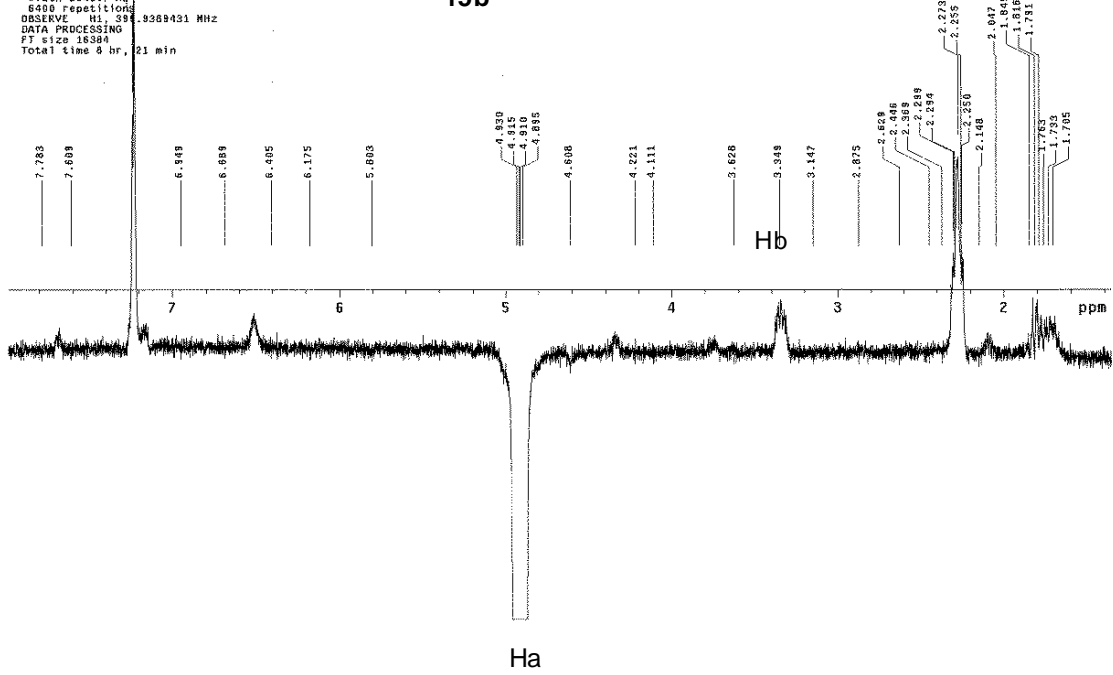

fs-V-145-proton

Sample Name:

Data Collected on:  
chemarr00.chem.buffalo.edu-inova400

Archive directory:

Sample directory:

Fidfile: PROTON

Pulse Sequence: PROTON (s2pul)  
Solvent: c6d6  
Data collected on: Apr 9 2012

Temp. 25.0 C / 298.1 K  
Operator: Chemler

Relax. delay 1.000 sec  
Pulse 45.0 degrees  
Acq. time 2.585 sec  
Width 6307.7 Hz  
8 repetitions  
OBSERVE H1, 399.9385087 MHz  
DATA PROCESSING  
F1 size 32768  
Total time 0 min 29 sec

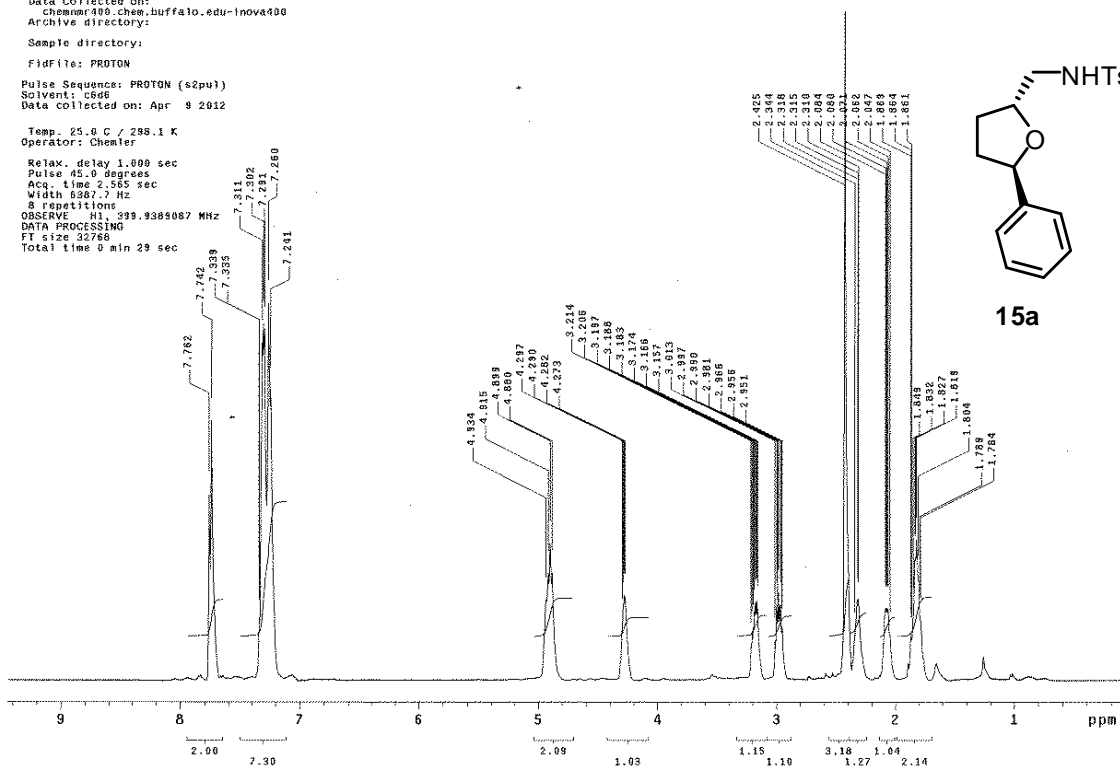

fs-V-145carbon

Sample Name:

Data Collected on:  
roxy.chem.buffalo.edu-mercury300

Archive directory:

Sample directory:

Fidfile: CARBON

Pulse Sequence: CARBON (s2pul)  
Solvent: cdcl3  
Data collected on: Apr 5 2012

Temp. 22.8 C / 295.9 K  
Operator: Sherry

Relax. delay 1.000 sec  
Pulse 45.0 degrees  
Acq. time 0.888 sec  
Width 18867.9 Hz  
488 repetitions  
OBSERVE C13, 75.4536430 MHz  
DECOUPLE H1, 300.0754430 MHz  
Power 98 dB  
continuously on  
WALTZ-16 modulated  
DATA PROCESSING  
Line broadening 0.5 Hz  
F1 size 32768  
Total time 187419 hr, 12 min

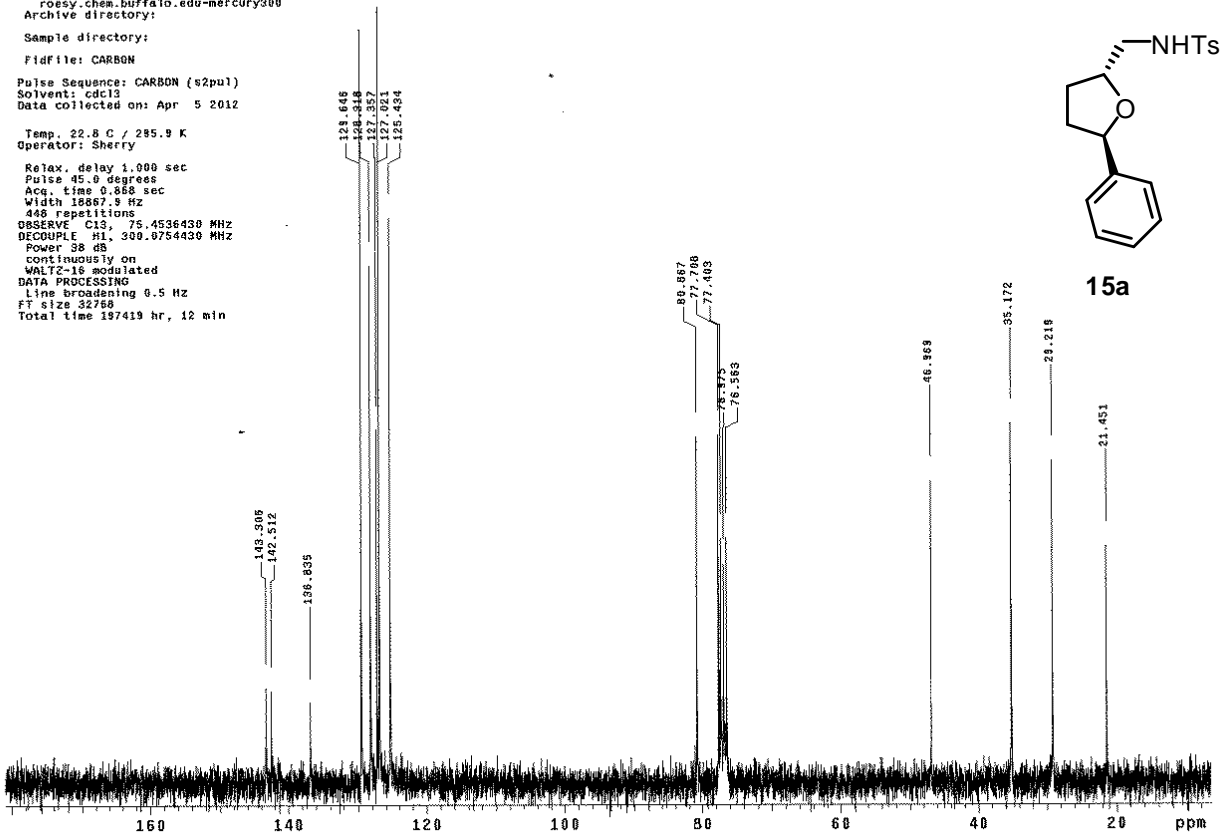

Supplement: NIHMS401310-supplement-2_si_002.pdf [file NIHMS401310-supplement-2_si_002.pdf]
